# Supplementary material for: Transcriptomic Profiling of Diverse Aedes aegypti Strains Reveals Increased Basal-level Immune Activation in Dengue Virus-refractory Populations and Identifies Novel Virus-vector Molecular Interactions
Source: PLoS Negl Trop Dis. 2013 Jul 4;7(7):e2295. doi: 10.1371/journal.pntd.0002295 (PMC3701703; doi:10.1371/journal.pntd.0002295)
Supplement: Table S2 — Log2-fold values and functional groups of transcripts that were enriched or depleted in each mosquito strain relative to Rock. Functional group abbreviations: CS, cytoskeletal and structural; CSR, chemosensory reception; DIV, diverse functions; DIG, blood and sugar food digestive; IMM, immunity; MET, metabolism; PROT, proteolysis; RSM, redox, stress and mitochondrion; RTT, replication, transcription, and translation; TRP, transport; UKN, unknown functions. MG, midgut; Car, carcass. (XLSX) [file pntd.0002295.s004.xlsx]

## Sheet: Master
Table S2. Log2-fold values and functional groups of transcripts that were enriched or depleted in each mosquito strain relative to Rock. Functional group abbreviations: CS, cytoskeletal and structural; CSR, chemosensory reception; DIV, diverse functions; DIG, blood and sugar food digestive; IMM, immunity; MET, metabolism; PROT, proteolysis; RSM, redox, stress and mitochondrion; RTT, replication, …
Ensembl Gene ID	Description	OUR_GO	IMM NAME	FAMILY	SUBFAMILY	GO_No	Blast_nr	anopheles	GO_term	CEGG	AED_V2 GAL immuneID_GeneName	Orl MG	Waco MG	PR MG	Kitts MG	Pfin MG	PTri MG	SIN MG	BKK MG	Orl Car	Waco Car	PR Car	Kitts Car	Pfin Car	PTri Car	SIN Car	BKK Car
AAEL000001	bystin	D					ENSANGP00000010976 [Anopheles gambiae str. PEST]	Bystin				0.242753	-0.357342	-0.701867	-0.394186	-0.661784	-1.00128	-0.506855	-0.518747	0.102172	-0.690038	-1.43866	-0.464685	-1.69214	-1.57048	-0.656938	-0.756038
AAEL000002	hypothetical protein	U																		-0.626172	1.65708	0.508289	0.735926	0.532657	0.792409	0.431184
AAEL000003	conserved hypothetical protein	D				GO:0004672,GO:0005739,GO:0006118,GO:0008152,GO:0019538	ENSANGP00000018621 [Anopheles gambiae str. PEST]	ABC-1	protein kinase activity;mitochondrion;electron transport;metabolism;protein metabolism			0.326377	1.26612	0.616211	0.528692	0.45953	0.668732	0.374205	0.806131	0.191038	0.218626	-0.269448	-0.228428	0.124846	0.131627		-0.0505077
AAEL000004	glycosyltransferase	D				GO:0006412,GO:0006464,GO:0006629,GO:0016740,GO:0019538	ENSANGP00000015233 [Anopheles gambiae str. PEST]	Alg9-like mannosyltransferase	protein biosynthesis;protein modification;lipid metabolism;transferase activity;protein metabolism			0.330336	0.661872							0.386017	0.675739	0.347791	-0.330336			-0.129364	0.875098
AAEL000005	hypothetical protein	D				GO:0003676,GO:0005634,GO:0008270			nucleic acid binding											0.276995	0.215751	-0.129796		0.47871	0.28381	0.176251	-0.219064
AAEL000006	phosphoenolpyruvate carboxykinase	M				GO:0000166,GO:0003824,GO:0005215,GO:0005739,GO:0005975,GO:0006091,GO:0006810,GO:0009058	ENSANGP00000018744 [Anopheles gambiae str. PEST]	Phosphoenolpyruvate carboxykinase (GTP)	nucleotide binding;catalytic activity;transporter activity;mitochondrion;carbohydrate metabolism;generation of precursor metabolites and energy;transport;biosynthesis											0.358282	0.773088	-0.295734	0.664935			0.685121	-0.772106
AAEL000007	conserved hypothetical protein	U					ENSANGP00000018627 [Anopheles gambiae str. PEST]
AAEL000008	wd and tetratricopeptide repeat protein	D				GO:0003677,GO:0005488,GO:0005489,GO:0005634,GO:0005975,GO:0006118,GO:0006629,GO:0006950,GO:0009628	ENSANGP00000000953 [Anopheles gambiae str. PEST]	Myb, DNA-binding;TonB box, N-terminal;WD-40 repeat;G-protein, beta subunit;Groucho/transducin-like enhancer;Tetratricopeptide TPR_1;Tetratricopeptide TPR_2;Tetratricopeptide region	DNA binding;binding;electron transporter activity;nucleus;carbohydrate metabolism;electron transport;lipid metabolism;response to stress;response to abiotic stimulus
AAEL000009	hypothetical protein	U					indora [Wolbachia endosymbiont of Drosophila ananassae]														-1.55736
AAEL000010	ribosomal protein L36, putative	RTT				GO:0003676,GO:0005198,GO:0005829,GO:0005840,GO:0006412			nucleic acid binding			-0.393307	-0.0622356	0.0999628	0.193938	-0.145183	0.119383	-0.225843	0.272762	-0.247136	0.168681	0.079865	0.791569	0.667198	0.703107	1.54346	0.483249
AAEL000011	conserved hypothetical protein	U					ENSANGP00000018627 [Anopheles gambiae str. PEST]
AAEL000012	Gustatory receptor 61a, putative	CSR					ENSANGP00000022902 [Anopheles gambiae str. PEST]	Trehalose receptor
AAEL000013	peptidyl-prolyl cis-trans isomerase (cyclophilin)	D				GO:0003824,GO:0009607,GO:0015031,GO:0016043,GO:0019538	ENSANGP00000013567 [Anopheles gambiae str. PEST]	Peptidyl-prolyl cis-trans isomerase, cyclophilin type;Tetratricopeptide TPR_1;Tetratricopeptide TPR_2;Tetratricopeptide region	catalytic activity;response to biotic stimulus;protein transport;cell organization and biogenesis;protein metabolism				-0.340023	-0.130897	-0.206621	-0.229345	-0.249615	-0.46738	-0.326474							-0.144322	-0.213551
AAEL000014	cyclic-nucleotide-gated cation channel	TRP				GO:0004872,GO:0005216,GO:0005623,GO:0006811,GO:0007165,GO:0007582	ENSANGP00000000954 [Anopheles gambiae str. PEST]	Cyclic nucleotide-binding;Ion transport;K+ channel, pore region	receptor activity;ion channel activity;cell;ion transport;signal transduction;physiological process
AAEL000015	phd finger transcription factor	D				GO:0003677	ENSANGP00000005615 [Anopheles gambiae str. PEST]	Bromo adjacent region	DNA binding
AAEL000016	conserved hypothetical protein	D					ENSANGP00000016674 [Anopheles gambiae str. PEST]	Phospholipase/Carboxylesterase;Protein of unknown function DUF341				0.093344	-0.218281		-0.259019		0.246084	-0.121191	0.0252245	0.435855	0.324079		-0.0862327	0.123173	0.217677	0.135544	0.322846
AAEL000017	hypothetical protein	U																				2.62085		3.63076	3.13328
AAEL000018	conserved hypothetical protein	U					ENSANGP00000022485 [Anopheles gambiae str. PEST]
AAEL000019	conserved hypothetical protein	U					i23M [Aedes albopictus]													-0.363108	0.169675		-0.348371		0.614594	-0.54745	0.531644
AAEL000020	conserved hypothetical protein	U
AAEL000021	conserved hypothetical protein	U
AAEL000022	conserved hypothetical protein	U					ENSANGP00000018846 [Anopheles gambiae str. PEST]					-0.159729	-0.46782	-0.322492	-0.139668	-0.351607	-0.260477	-0.481683	-0.264529	-0.388768	-0.219225	-0.238853	-0.0665169	-0.17799	-0.201726	-0.39511	-0.468391
AAEL000023	hypothetical protein	U					PREDICTED: similar to erythroid differentiationlated factor 1, partial [Strongylocentrotus purpuratus]
AAEL000024	dopachrome-conversion enzyme (DCE), putative	I				GO:0003824,GO:0005102,GO:0005198,GO:0005576,GO:0006519,GO:0007275,GO:0009058,GO:0019748	ENSANGP00000020299 [Anopheles gambiae str. PEST]	Major royal jelly protein	catalytic activity;receptor binding;structural molecule activity;extracellular region;amino acid and derivative metabolism;development;biosynthesis;secondary metabolism											-0.473826	-0.906888	-0.651257	-0.293887	-0.348123	-0.616617	-0.504276	-0.3304
AAEL000025	phosphoenolpyruvate carboxykinase	M				GO:0000166,GO:0003824,GO:0005215,GO:0005739,GO:0005975,GO:0006091,GO:0006810,GO:0009058	ENSANGP00000018744 [Anopheles gambiae str. PEST]	Phosphoenolpyruvate carboxykinase (GTP)	nucleotide binding;catalytic activity;transporter activity;mitochondrion;carbohydrate metabolism;generation of precursor metabolites and energy;transport;biosynthesis
AAEL000026	dynein light chain, putative	CS					ENSANGP00000017625 [Anopheles gambiae str. PEST]						-0.394932		-0.251333	-0.391065			-0.41228	0.297752				0.238414	0.34222	0.193505	-0.0979544
AAEL000027	conserved hypothetical protein	U					ENSANGP00000018627 [Anopheles gambiae str. PEST]
AAEL000028	serine protease	I				GO:0003677,GO:0003700,GO:0005634,GO:0006350,GO:0008233,GO:0009607,GO:0019538,GO:0030234,GO:0050789	ENSANGP00000023886 [Anopheles gambiae str. PEST]	Peptidase S1 and S6, chymotrypsin/Hap;Peptidase S1A, chymotrypsin	DNA binding				-0.367758	0.120342	-0.326958	0.599574		-0.409617	0.355915	-0.448071	-0.290485	-0.314187	-0.58098	-0.537238	-0.523452	-0.440305	-0.0147239
AAEL000029	dopachrome-conversion enzyme (DCE), putative	I				GO:0003824,GO:0005102,GO:0005198,GO:0005576,GO:0006519,GO:0007275,GO:0009058,GO:0019748	ENSANGP00000013424 [Anopheles gambiae str. PEST]	Major royal jelly protein	catalytic activity;receptor binding;structural molecule activity;extracellular region;amino acid and derivative metabolism;development;biosynthesis;secondary metabolism
AAEL000030	clip-domain serine protease, putative	I				GO:0008233,GO:0019538	ENSANGP00000012642 [Anopheles gambiae str. PEST]	Peptidase S1 and S6, chymotrypsin/Hap;Peptidase S1A, chymotrypsin	peptidase activity;protein metabolism											-0.775838	-0.143292	-0.0647866	-0.738624	-0.509813	0.258354	-0.0393344	1.01989
AAEL000031	conserved hypothetical protein	U					ENSANGP00000018627 [Anopheles gambiae str. PEST]
AAEL000032	ribosomal protein S6	RTT				GO:0003676,GO:0005198,GO:0005829,GO:0005840,GO:0006412,GO:0007582,GO:0009607,GO:0050789	ribosomal protein S6 [Aedes aegypti]	Ribosomal protein S6e;Histone H5;Treacher Collins syndrome protein Treacle;Melatonin receptor type 1C;Acid shock	nucleic acid binding			0.221492	0.353662	0.363563	0.440211	0.16661	0.22615	0.468944	0.194044	-0.402235	0.336822	-0.0567025	0.663561	0.254603	0.175539	0.444588	-0.15685
AAEL000033	conserved hypothetical protein	U					ENSANGP00000013540 [Anopheles gambiae str. PEST]																	0.0432185	-0.255858
AAEL000034	meiotic recombination repair protein 11 (mre11)	REDOX/STRESS/MIT				GO:0003676,GO:0004518,GO:0005488,GO:0005634,GO:0006259,GO:0006950,GO:0006996,GO:0007049,GO:0009719	ENSANGP00000013179 [Anopheles gambiae str. PEST]	Metallophosphoesterase;Mre11, DNA-binding	nucleic acid binding;nuclease activity;binding;nucleus;DNA metabolism;response to stress;organelle organization and biogenesis;cell cycle;response to endogenous stimulus											0.271357	0.882479	0.266479		0.84652	0.399999	0.43212	0.542736
AAEL000035	Odorant-binding protein 56e, putative	CSR				GO:0005549,GO:0006810	odorant-binding protein AgamOBP13 [Anopheles gambiae]	Pheromone/general odorant binding protein, PBP/GOBP	odorant binding;transport
AAEL000036	hypothetical protein	U					ENSANGP00000026929 [Anopheles gambiae str. PEST]
AAEL000037	serine protease	I				GO:0003677,GO:0003700,GO:0005634,GO:0006350,GO:0008233,GO:0009607,GO:0019538,GO:0030234,GO:0050789	ENSANGP00000023886 [Anopheles gambiae str. PEST]	Peptidase S1 and S6, chymotrypsin/Hap;Peptidase S1A, chymotrypsin	DNA binding;transcription factor activity;nucleus;transcription;peptidase activity;response to biotic stimulus;protein metabolism;enzyme regulator activity;regulation of biological process											0.311617	-0.778264			0.761396	0.470699	-0.261192	0.240502
AAEL000038	serine protease	I	none	CLIP	CLIP-SP-CLIP-SP	GO:0000003,GO:0003677,GO:0003700,GO:0005576,GO:0005634,GO:0006350,GO:0007165,GO:0007275,GO:0008233,GO:0009607,GO:0019538,GO:0030154,GO:0030234,GO:0050789	serine protease [Armigeres subalbatus]	Peptidase S1 and S6, chymotrypsin/Hap;Peptidase S1A, chymotrypsin	reproduction;DNA binding;transcription factor activity;extracellular region;nucleus;transcription;signal transduction;development;peptidase activity;response to biotic stimulus;protein metabolism;cell differentiation;enzyme regulator activity;regulation o	Aaeg:N18126		-0.339789	-0.273211		0.558908	0.691905	-0.320417	0.151024		-0.451855	-0.139042	0.252723	0.339789	-0.169032	-0.252422	-0.495981	0.219452
AAEL000039	conserved hypothetical protein	U					ENSANGP00000016965 [Anopheles gambiae str. PEST]
AAEL000040	elastase, putative	I				GO:0004252,GO:0006508	ENSANGP00000020749 [Anopheles gambiae str. PEST]	Peptidase S1 and S6, chymotrypsin/Hap;Peptidase S1A, chymotrypsin	serine-type endopeptidase activity;proteolysis			-0.203074	-0.467232							-0.457754	0.138892	-0.0383976	0.203074	0.661892	-0.340751	-0.869716	-0.101586
AAEL000041	forkhead box protein (AaegFOXM2)	D				GO:0003700,GO:0005634,GO:0006355,GO:0043565	ENSANGP00000018609 [Anopheles gambiae str. PEST]	Fork head transcription factor	transcription factor activity;nucleus;regulation of transcription\, DNA-dependent;sequence-specific DNA binding
AAEL000042	conserved hypothetical protein	REDOX/STRESS/MIT				GO:0005515,GO:0019538	ENSANGP00000018929 [Anopheles gambiae str. PEST]	Heat shock protein DnaJ;Heat shock protein DnaJ, N-terminal	protein binding;protein metabolism
AAEL000043	Gustatory receptor 64e, putative	CSR					ENSANGP00000025206 [Anopheles gambiae str. PEST]	Trehalose receptor
AAEL000044	ornithine decarboxylase	M				GO:0003824,GO:0006519,GO:0009058	ENSANGP00000008816 [Anopheles gambiae str. PEST]	Orn/DAP/Arg decarboxylase 2;Ornithine decarboxylase	catalytic activity
AAEL000045	nmda receptor glutamate-binding chain	D				GO:0004872,GO:0005886,GO:0043234			receptor activity;plasma membrane;protein complex
AAEL000046	conserved hypothetical protein	U					ENSANGP00000017069 [Anopheles gambiae str. PEST]
AAEL000047	conserved hypothetical protein	U					ENSANGP00000018627 [Anopheles gambiae str. PEST]
AAEL000048	gustatory receptor for trehalose (trehalose receptor)	CSR				GO:0004872,GO:0005623,GO:0007582	ENSANGP00000024321 [Anopheles gambiae str. PEST]	Cellulose synthase, subunit A;Trehalose receptor	receptor activity;cell;physiological process
AAEL000049	three prime repair exonuclease 1, putative	D					ENSANGP00000026876 [Anopheles gambiae str. PEST]							-0.189521	0.0898812	-0.270171	-0.451399	-0.147782	-0.18873
AAEL000050	conserved hypothetical protein	U					ENSANGP00000022188 [Anopheles gambiae str. PEST]
AAEL000051	Odorant-binding protein 56e, putative	CSR				GO:0005549,GO:0006810	odorant-binding protein AgamOBP19 [Anopheles gambiae]	Pheromone/general odorant binding protein, PBP/GOBP	odorant binding;transport			-0.351408	-0.670214	-0.486302	-0.979711		-0.784012	-0.706906	-1.1862								0.407002
AAEL000052	conserved hypothetical protein	U					ENSANGP00000018627 [Anopheles gambiae str. PEST]
AAEL000053	myotubularin	D				GO:0004721,GO:0019538	ENSANGP00000013574 [Anopheles gambiae str. PEST]	Myotubularinlated	phosphoprotein phosphatase activity;protein metabolism											0.212219	-0.0737532			-0.168366		0.156838	-0.353343
AAEL000054	mixed-lineage leukemia protein, mll	M				GO:0000003,GO:0003677,GO:0003824,GO:0005488,GO:0005622,GO:0005634,GO:0005654,GO:0006259,GO:0006350,GO:0006464,GO:0006996,GO:0007275,GO:0007582,GO:0016740,GO:0030528,GO:0040029,GO:0043234	ENSANGP00000002662 [Anopheles gambiae str. PEST]	H+-transporting two-sector ATPase, alpha/beta subunit, central region;Zinc finger, PHD-type;Antifreeze protein, type I;Involucrin repeat;FYch, N-terminal;Zinc finger, C2H2-type;FYch, C-terminal;Nuclear protein SET;SETlated region	reproduction;DNA binding;catalytic activity;binding;intracellular;nucleus;nucleoplasm;DNA metabolism;transcription;protein modification;organelle organization and biogenesis;development;physiological process;transferase activity;transcription regulator ac											0.269905	0.397341	0.198624		0.534702			-0.23032
AAEL000055	conserved hypothetical protein	U					ENSANGP00000017075 [Anopheles gambiae str. PEST]														2.63002	2.90911		2.79858	2.7935	1.03835
AAEL000056	conserved hypothetical protein	D					ENSANGP00000010949 [Anopheles gambiae str. PEST]	Retrotransposon gag protein
AAEL000057	toll	I	TOLL5B	TOLL	TOLL	GO:0004872,GO:0005515,GO:0005623,GO:0005886,GO:0006950,GO:0007165,GO:0007275,GO:0007582,GO:0008283,GO:0009607,GO:0009790,GO:0019748,GO:0030154,GO:0050789	Tolllated protein; AeToll1 [Aedes aegypti]	Carbohydrate kinase, FGGY;Interleukin-1 receptor, type I/Toll precursor;Leucinech repeat;Leucinech repeat, cysteinech flanking region, N-terminal;Toll-Interleukin receptor;Leucinech repeat, typical subtype	receptor activity;protein binding;cell;plasma membrane;response to stress;signal transduction;development;physiological process;cell proliferation;response to biotic stimulus;embryonic development;secondary metabolism;cell differentiation;regulation of bi	Aaeg:N18103
AAEL000058	hypothetical protein	U					CG11073-PA [Drosophila melanogaster]
AAEL000059	proacrosin, putative	M				GO:0006519,GO:0008233,GO:0009058,GO:0019538,GO:0030234,GO:0050789	serine protease [Anopheles gambiae]	Aldehyde dehydrogenase;Peptidase S1 and S6, chymotrypsin/Hap;Peptidase S1A, chymotrypsin	amino acid and derivative metabolism;peptidase activity;biosynthesis;protein metabolism;enzyme regulator activity;regulation of biological process												-0.221415				0.409516		-0.588275
AAEL000060	Gustatory receptor 64a, putative	CSR				GO:0004872,GO:0005623,GO:0007582	ENSANGP00000023700 [Anopheles gambiae str. PEST]	Trehalose receptor	receptor activity;cell;physiological process
AAEL000061	hypothetical protein	U					hypothetical protein [Trypanosoma cruzi strain CL Brener]
AAEL000062	adenylate cyclase	D				GO:0003824,GO:0005623,GO:0006139,GO:0007165,GO:0009058	ENSANGP00000006240 [Anopheles gambiae str. PEST]	Phosphopantetheine attachment site;Adenylyl cyclase class-3/4/guanylyl cyclase;Adenylate cyclase-like	catalytic activity;cell;nucleobase\, nucleoside\, nucleotide and nucleic acid metabolism;signal transduction;biosynthesis					-0.213833			-0.407206	0.502893
AAEL000063	conserved hypothetical protein	U					ENSANGP00000018627 [Anopheles gambiae str. PEST]
AAEL000064	dopachrome-conversion enzyme (DCE) isoenzyme, putative	I				GO:0003824,GO:0005102,GO:0005198,GO:0005576,GO:0006519,GO:0007275,GO:0009058,GO:0019748	dopachrome conversion enzyme [Aedes aegypti]	Calcium-binding EF-hand;Major royal jelly protein	catalytic activity;receptor binding;structural molecule activity;extracellular region;amino acid and derivative metabolism;development;biosynthesis;secondary metabolism											-0.248047	0.600375		-0.351638		-0.412185	-0.902815	0.332883
AAEL000065	conserved hypothetical protein	D				GO:0003676,GO:0005634,GO:0008270	ENSANGP00000010927 [Anopheles gambiae str. PEST]	Zinc finger, C2H2-type	nucleic acid binding;nucleus;zinc ion binding											-0.0938062				-0.489491
AAEL000066	conserved hypothetical protein	U					ENSANGP00000022485 [Anopheles gambiae str. PEST]
AAEL000067	hypothetical protein	D					ENSANGP00000027613 [Anopheles gambiae str. PEST]	Histamine H3 receptor;Prolinech region				0.23156	0.116747	0.249148	0.0426234		0.14894	0.104908	0.237176		0.211139	0.461858	-0.23156		0.177683	0.230296	0.455115
AAEL000068	ribosomal protein S25, putative	RTT				GO:0003723,GO:0005198,GO:0005829,GO:0005840,GO:0006412			RNA binding			-0.264634	-0.253748	-0.0643097	-0.348382	-0.18352	-0.305232	-0.345214	-0.161479	0.184794	-0.274744	-0.480687	-0.134205	-0.155575	0.0153694	0.0974664	-0.660461
AAEL000069	Gustatory receptor 64a, putative	CSR					ENSANGP00000023700 [Anopheles gambiae str. PEST]	Trehalose receptor
AAEL000070	conserved hypothetical protein	D					ENSANGP00000013505 [Anopheles gambiae str. PEST]	Cytoplasmic fragile X mental retardation protein interacting protein												-0.184357	-0.213936	-0.204571		-0.166901		0.297708	-0.283246
AAEL000071	Odorant-binding protein 56a, putative	CSR				GO:0005549,GO:0006810	odorant-binding protein AgamOBP6 [Anopheles gambiae]	Pheromone/general odorant binding protein, PBP/GOBP	odorant binding;transport
AAEL000072	hypothetical protein	PROT					carboxypeptidase B [Ochlerotatus triseriatus]	Peptidase M14, carboxypeptidase A
AAEL000073	Odorant-binding protein 56e, putative	CSR				GO:0005549,GO:0006810	odorant-binding protein AgamOBP20 [Anopheles gambiae]	Pheromone/general odorant binding protein, PBP/GOBP	odorant binding;transport
AAEL000074	serine protease	I				GO:0006519,GO:0008233,GO:0009058,GO:0019538,GO:0030234,GO:0050789		Peptidase S1 and S6, chymotrypsin/Hap;Peptidase S1A, chymotrypsin	amino acid and derivative metabolism;peptidase activity;biosynthesis;protein metabolism;enzyme regulator activity;regulation of biological process											0.0928434	-0.145336	-0.305098	-0.193055	-0.184794	0.0469462	-0.325897	0.14468
AAEL000075	Gustatory receptor 64f, putative	CSR				GO:0004872,GO:0005623,GO:0007582	ENSANGP00000024727 [Anopheles gambiae str. PEST]	Trehalose receptor	receptor activity;cell;physiological process
AAEL000076	dimethyladenosine transferase	M				GO:0003676,GO:0006139,GO:0016740			nucleic acid binding;nucleobase\, nucleoside\, nucleotide and nucleic acid metabolism;transferase activity
AAEL000077	cation efflux protein/ zinc transporter	TRP				GO:0005215,GO:0005623,GO:0006811	ENSANGP00000017072 [Anopheles gambiae str. PEST]	HMW kininogen;Cation efflux protein	transporter activity;cell;ion transport			-0.192521	-0.216278	-0.316169	-0.15523	-0.189697	-0.313511	-0.246143	-0.500189	-0.25269	-0.277129	-0.246562	0.192521	-0.377692	-0.28794	-0.162265	-0.41857
AAEL000078	conserved hypothetical protein	D					glycoprotein gp2 [Equine herpesvirus 1]
AAEL000079	hypothetical protein	D					ENSANGP00000015218 [Anopheles gambiae str. PEST]	Leucinech repeat;Leucinech repeat, ribonuclease inhibitor type												0.281919		0.347541		0.229846		0.338651	-0.441143
AAEL000080	phosphoenolpyruvate carboxykinase	M				GO:0000166,GO:0003824,GO:0005215,GO:0005739,GO:0005975,GO:0006091,GO:0006810,GO:0009058	ENSANGP00000018744 [Anopheles gambiae str. PEST]	Phosphoenolpyruvate carboxykinase (GTP)	nucleotide binding;catalytic activity;transporter activity;mitochondrion;carbohydrate metabolism;generation of precursor metabolites and energy;transport;biosynthesis												1.39555	0.256828		0.455359		0.775993	0.537955
AAEL000081	peroxisome assembly factor-2 (peroxisomal-type atpase 1)	REDOX/STRESS/MIT				GO:0000003,GO:0000166,GO:0005622,GO:0005737,GO:0005783,GO:0005856,GO:0006810,GO:0006996,GO:0007010,GO:0007049,GO:0007582,GO:0008233,GO:0009653,GO:0015031,GO:0016043,GO:0016787,GO:0019538,GO:0030154,GO:0043234,GO:0050789	smallminded CG8571-PA, isoform A [Drosophila melanogaster]	AAA-protein subdomain;CbxX/CfqX;AAA ATPase, central region;ATPase associated with various cellular activities, AAA-5	reproduction;nucleotide binding;intracellular;cytoplasm;endoplasmic reticulum;cytoskeleton;transport;organelle organization and biogenesis;cytoskeleton organization and biogenesis;cell cycle;physiological process;peptidase activity;morphogenesis;protein t											0.140921	0.265382	0.138401				0.0850559	-0.175329
AAEL000082	Gustatory receptor 64a, putative	CSR					ENSANGP00000023560 [Anopheles gambiae str. PEST]	Trehalose receptor
AAEL000083	conserved hypothetical protein	D					CNG channel-like CG9176-PB, isoform B [Drosophila melanogaster]
AAEL000084	elongin b	D				GO:0005515,GO:0005654,GO:0006350,GO:0030528,GO:0043234	ENSANGP00000016615 [Anopheles gambiae str. PEST]	Ubiquitin	protein binding;nucleoplasm;transcription;transcription regulator activity;protein complex			0.182333	0.183184	0.238887	0.201129	0.261474	0.35288	0.260058	0.357876	0.0560929	-0.219374		-0.182333	-0.0931116
AAEL000085	pupal cuticle protein, putative	CS					ENSANGP00000022159 [Anopheles gambiae str. PEST]
AAEL000086	clip-domain serine protease, putative	I				GO:0000003,GO:0003677,GO:0003700,GO:0005576,GO:0005634,GO:0006350,GO:0007165,GO:0007275,GO:0008233,GO:0009607,GO:0019538,GO:0030154,GO:0030234,GO:0050789	serine protease 14D [Anopheles gambiae]	Peptidase S1 and S6, chymotrypsin/Hap;Peptidase S1A, chymotrypsin	reproduction;DNA binding;transcription factor activity;extracellular region;nucleus;transcription;signal transduction;development;peptidase activity;response to biotic stimulus;protein metabolism;cell differentiation;enzyme regulator activity;regulation o
AAEL000087	macroglobulin/complement	I	TEP22	TEP	TEP	GO:0006950,GO:0007582,GO:0009607,GO:0030234	ENSANGP00000021282 [Anopheles gambiae str. PEST]	Alpha-2-macroglobulin;Alpha-2-macroglobulin, N-terminal;Alpha-2-macroglobulin, N-terminal 2;A-macroglobulin complement component;A-macroglobulin receptor	response to stress;physiological process;response to biotic stimulus;enzyme regulator activity	Aaeg:N18082										0.404266	0.43623	0.428658	-0.509991	0.431471	0.26587	-0.367294	0.610896
AAEL000088	brefeldin A-sensitive peripheral Golgi protein, putative	D				GO:0005623,GO:0005794,GO:0006810,GO:0006996,GO:0007030,GO:0015031,GO:0016020,GO:0016043	ENSANGP00000018907 [Anopheles gambiae str. PEST]	COG complex component, COG2	cell;Golgi apparatus;transport;organelle organization and biogenesis;Golgi organization and biogenesis;protein transport;membrane;cell organization and biogenesis				-0.101946
AAEL000089	conserved hypothetical protein	U					ENSANGP00000022485 [Anopheles gambiae str. PEST]
AAEL000090	secretory carrier-associated membrane protein (scamp)	D				GO:0005215,GO:0005488,GO:0005623,GO:0006810,GO:0007267,GO:0015031,GO:0016023,GO:0016043	ENSANGP00000010931 [Anopheles gambiae str. PEST]	SCAMP	transporter activity;binding;cell;transport;cell-cell signaling;protein transport;cytoplasmic membrane-bound vesicle;cell organization and biogenesis				0.0989297	0.198668	0.749153	0.252488	0.325197	0.127765	0.410205
AAEL000091	sumo-1-activating enzyme E1a	D				GO:0003824,GO:0005515,GO:0005634,GO:0006350,GO:0006464,GO:0009056,GO:0015031,GO:0016043,GO:0019538,GO:0043234,GO:0050789	ENSANGP00000023276 [Anopheles gambiae str. PEST]	UBA/THIF-type NAD/FAD binding fold	catalytic activity;protein binding;nucleus;transcription;protein modification;catabolism;protein transport;cell organization and biogenesis;protein metabolism;protein complex;regulation of biological process											0.247759	0.149352	0.207735		0.182066	0.159062		-0.127405
AAEL000092	glutathione-s-transferase theta, gst	REDOX/STRESS/MIT						Glutathione S-transferase, N-terminal;Glutathione S-transferase, C-terminal				-0.131208	-0.272647	0.394441	0.487125	-0.177888		0.217011
AAEL000093	conserved hypothetical protein	D				GO:0005886,GO:0007049,GO:0007165,GO:0007582,GO:0009790,GO:0030234,GO:0050789	ENSANGP00000021695 [Anopheles gambiae str. PEST]	Ras GTPase-activating protein;Tec/Btk;C2;Pleckstrin-like	plasma membrane;cell cycle;signal transduction;physiological process;embryonic development;enzyme regulator activity;regulation of biological process											0.0787053	0.28607	0.172487			0.19204	0.313635
AAEL000094	hypothetical protein	U					ENSANGP00000022007 [Anopheles gambiae str. PEST]
AAEL000095	conserved hypothetical protein	U					ENSANGP00000018627 [Anopheles gambiae str. PEST]
AAEL000096	conserved hypothetical protein	U					ENSANGP00000010378 [Anopheles gambiae str. PEST]
AAEL000097	n-acetylneuraminate synthetase	D				GO:0003824,GO:0005488,GO:0005975,GO:0006412,GO:0006464,GO:0006950,GO:0007582,GO:0009058,GO:0009628	ENSANGP00000003869 [Anopheles gambiae str. PEST]	N-acetylneuraminic acid synthase, N-terminal;Antifreeze-like/N-acetylneuraminic acid synthase C-terminal	catalytic activity;binding;carbohydrate metabolism;protein biosynthesis;protein modification;response to stress;physiological process;biosynthesis;response to abiotic stimulus
AAEL000098	hypothetical protein	RTT					DNA-directed RNA polymerase (EC 2.7.7.6) II largest chain [Cryptosporidium hominis TU502]						-0.126199	-0.380678		-0.275233	-0.168636	-0.371223	-0.622259
AAEL000099	serine protease	I				GO:0008233,GO:0009607,GO:0019538,GO:0030234	ENSANGP00000023886 [Anopheles gambiae str. PEST]	Peptidase S1 and S6, chymotrypsin/Hap;Peptidase S1A, chymotrypsin	peptidase activity;response to biotic stimulus;protein metabolism;enzyme regulator activity
AAEL000100	hypothetical protein	U					conserved hypothetical protein [Bacillus clausii KSM-K16]														1.65042	0.690733		1.00854	1.12507	0.712987
AAEL000101	AMP dependent coa ligase	M				GO:0003824,GO:0006629,GO:0009058,GO:0016740	ENSANGP00000003832 [Anopheles gambiae str. PEST]	AMP-dependent synthetase and ligase	catalytic activity;lipid metabolism;biosynthesis;transferase activity			0.658063	-0.931784			0.266776		0.38612	1.08919	-0.36059	-0.754377	-0.682103		-0.648309	-0.458341		-0.222825
AAEL000102	conserved hypothetical protein	D				GO:0006777	ENSANGP00000010487 [Anopheles gambiae str. PEST]	Phytanoyl-CoA dioxygenase				-0.237168	-0.390678	-0.212866	-0.0161319	-0.210299	0.0504172	0.0719253	0.338253	-0.48239	-0.286475	-0.301803	0.159428	-0.367497	-0.275189	-0.212327	-0.442467
AAEL000103	conserved hypothetical protein	D					ENSANGP00000015725 [Anopheles gambiae str. PEST]	Vascular endothelial growth factor receptor, VEGFR;Immunoglobulin I-set;Immunoglobulin V-set;Immunoglobulin;Immunoglobulin-like
AAEL000104	notum	M				GO:0005615,GO:0005975,GO:0007165,GO:0007275,GO:0019538,GO:0050789	ENSANGP00000020476 [Anopheles gambiae str. PEST]	Pectinacetylesterase	;carbohydrate metabolism;signal transduction;development;protein metabolism;regulation of biological process
AAEL000105	beta-alanine synthase, putative	D				GO:0008152,GO:0016787	ENSANGP00000011026 [Anopheles gambiae str. PEST]	Nitrilase/cyanide hydratase and apolipoprotein N-acyltransferase	metabolism;hydrolase activity											0.713229	1.28841	0.483477	1.07794	0.309131	4.16458		0.658661
AAEL000106	conserved hypothetical protein	U					ENSANGP00000022119 [Anopheles gambiae str. PEST]															-0.200572
AAEL000107	hypothetical protein	D				GO:0003676,GO:0005488,GO:0005634,GO:0006139,GO:0006350,GO:0008283,GO:0030528,GO:0050789		Zinc finger, C2H2-type;Zinc finger, C2H2-subtype	nucleic acid binding;binding;nucleus;nucleobase\, nucleoside\, nucleotide and nucleic acid metabolism;transcription;cell proliferation;transcription regulator activity;regulation of biological process											-0.137629	0.214956	0.185784		0.662253	0.363587	0.336776
AAEL000108	leucine aminopeptidase	PROT				GO:0005622,GO:0008233,GO:0019538	ENSANGP00000018393 [Anopheles gambiae str. PEST]	Peptidase M17, leucyl aminopeptidase, C-terminal;Peptidase M17, leucyl aminopeptidase, N-terminal	intracellular;peptidase activity;protein metabolism
AAEL000109	enolase-phosphatase e-1	M				GO:0003824,GO:0008152	ENSANGP00000018103 [Anopheles gambiae str. PEST]	Haloacid dehalogenase/epoxide hydrolase;Haloacid dehalogenase-like hydrolase	catalytic activity;metabolism
AAEL000110	conserved hypothetical protein	D				GO:0003676,GO:0005634,GO:0008270	PREDICTED: similar to Zinc finger protein Kr18 (HKr18) isoform 1 [Danio rerio]	Zinc finger, C2H2-type;Zinc finger, C2H2-subtype	nucleic acid binding;nucleus;zinc ion binding
AAEL000111	nitrilase, putative	M				GO:0008152,GO:0016787	ENSANGP00000010981 [Anopheles gambiae str. PEST]	Nitrilase/cyanide hydratase and apolipoprotein N-acyltransferase	metabolism;hydrolase activity											-0.269044	0.306573	0.429576		-0.204628	-0.366759		0.335722
AAEL000112	conserved hypothetical protein	U					ENSANGP00000026769 [Anopheles gambiae str. PEST]
AAEL000113	conserved hypothetical protein	D					ENSANGP00000023153 [Anopheles gambiae str. PEST]	Ankyrin
AAEL000114	nucleoprotein, putative	D				GO:0019013	nucleocapsid major protein [Flanders virus]		viral nucleocapsid
AAEL000115	conserved hypothetical protein	D				GO:0003723			RNA binding			0.000663621	0.436716	-0.240475	0.182775	-0.238902		-0.0257591	-0.167258	-0.686797	0.304457	-0.30807	0.141137	-0.167933	0.0753219	-0.0712862	-0.333549
AAEL000116	conserved hypothetical protein	D				GO:0003723,GO:0003824,GO:0007049,GO:0050789	ENSANGP00000015405 [Anopheles gambiae str. PEST]		RNA binding;catalytic activity;cell cycle;regulation of biological process
AAEL000117	conserved hypothetical protein	U					ENSANGP00000026769 [Anopheles gambiae str. PEST]
AAEL000118	cleavage and polyadenylation specificity factor	M				GO:0003723,GO:0004518,GO:0005654,GO:0006139,GO:0043234	ENSANGP00000021939 [Anopheles gambiae str. PEST]	RNA-metabolising metallo-beta-lactamase	RNA binding;nuclease activity;nucleoplasm;nucleobase\, nucleoside\, nucleotide and nucleic acid metabolism;protein complex				0.0672348			-0.237958		0.12264	0.0789342			-0.153001					-0.211815
AAEL000119	AMP dependent coa ligase	M				GO:0003824,GO:0006629,GO:0009058,GO:0016740	ENSANGP00000025031 [Anopheles gambiae str. PEST]	AMP-dependent synthetase and ligase	catalytic activity;lipid metabolism;biosynthesis;transferase activity
AAEL000120	hypothetical protein	D				GO:0019013	nucleoprotein N [Bovine ephemeral fever virus]		viral nucleocapsid
AAEL000121	dihydropyridine-sensitive l-type calcium channel	TRP				GO:0005216,GO:0005623,GO:0006811,GO:0007582	ENSANGP00000021218 [Anopheles gambiae str. PEST]	Glutamine amidotransferase, class-II;von Willebrand factor, type A;Cache	ion channel activity;cell;ion transport;physiological process
AAEL000122	conserved hypothetical protein	D				GO:0003676,GO:0005634,GO:0008270	PREDICTED: similar to Zinc finger protein 180 (HHZ168) [Danio rerio]	Zinc finger, C2H2-type;Zinc finger, C2H2-subtype	nucleic acid binding;nucleus;zinc ion binding													-0.209049
AAEL000123	conserved hypothetical protein	D				GO:0005576,GO:0007165	ENSANGP00000001322 [Anopheles gambiae str. PEST]	Immunoglobulin;Immunoglobulin I-set;Immunoglobulin-like	extracellular region;signal transduction
AAEL000124	conserved hypothetical protein	CSR					ENSANGP00000020483 [Anopheles gambiae str. PEST]	Pheromone/general odorant binding protein, PBP/GOBP													-1.03114			-0.632909			0.184062
AAEL000125	hypothetical protein	D				GO:0003676,GO:0005634,GO:0008270			nucleic acid binding;nucleus;zinc ion binding												0.204505	-0.281374	-0.602629			-0.367491	-0.484983
AAEL000126	molybdopterin cofactor synthesis protein a	D				GO:0003824,GO:0005488,GO:0005941,GO:0009058	ENSANGP00000020395 [Anopheles gambiae str. PEST]	MoaA/nifB/pqqE;Radical SAM;Molybdenum cofactor synthesis C-terminal	catalytic activity;binding;unlocalized protein complex;biosynthesis
AAEL000127	AMP dependent coa ligase	M				GO:0003824,GO:0006629,GO:0009058,GO:0016740	ENSANGP00000014318 [Anopheles gambiae str. PEST]	AMP-dependent synthetase and ligase	catalytic activity;lipid metabolism;biosynthesis;transferase activity			0.362177		1.14469	1.20401	1.35196	0.338913	0.44815					-0.362177	-0.226457	-0.515714	-0.276904
AAEL000128	P130	D				GO:0000003,GO:0003677,GO:0005515,GO:0005634,GO:0005654,GO:0005694,GO:0006259,GO:0006350,GO:0007049,GO:0008283,GO:0030528,GO:0043234,GO:0050789	Retinoblastoma-family protein CG7413-PA [Drosophila melanogaster]	Retinoblastoma-associated protein, A-box;Retinoblastoma-associated protein, B-box	reproduction;DNA binding;protein binding;nucleus;nucleoplasm;chromosome;DNA metabolism;transcription;cell cycle;cell proliferation;transcription regulator activity;protein complex;regulation of biological process											-0.127904	-0.270228						-0.215927
AAEL000129	hypothetical protein	U					ENSANGP00000014226 [Anopheles gambiae str. PEST]
AAEL000130	nucleoprotein, putative	D				GO:0019013	nucleocapsid major protein [Flanders virus]		viral nucleocapsid
AAEL000131	sterol desaturase	M				GO:0003824,GO:0006629	GA15176-PA [Drosophila pseudoobscura]	Sterol desaturase;SUR2-type hydroxylase/desaturase, catalytic region	catalytic activity;lipid metabolism
AAEL000132	AMP dependent coa ligase	M				GO:0003824,GO:0006629,GO:0009058,GO:0016740	ENSANGP00000025031 [Anopheles gambiae str. PEST]	AMP-dependent synthetase and ligase	catalytic activity;lipid metabolism;biosynthesis;transferase activity
AAEL000133	conserved hypothetical protein	U					ENSANGP00000013192 [Anopheles gambiae str. PEST]
AAEL000134	conserved hypothetical protein	U					ENSANGP00000004077 [Anopheles gambiae str. PEST]	RUN
AAEL000135	sterol desaturase	M				GO:0003824,GO:0006629	CG1998-PA [Drosophila melanogaster]	Sterol desaturase;SUR2-type hydroxylase/desaturase, catalytic region	catalytic activity;lipid metabolism			0.0468118	-0.565599	-0.489933	-0.171618	-0.167409	-0.276136	-0.516245	-0.5956			-0.313381	-0.0468118		-0.452416
AAEL000136	conserved hypothetical protein	D				GO:0003676,GO:0005634,GO:0008270	PREDICTED: similar to zinc finger and BTB domain containing 40 isoform 1 [Bos taurus]	Zinc finger, C2H2-type;Peptidase M, neutral zinc metallopeptidases, zinc-binding site;Zinc finger, C2H2-subtype	nucleic acid binding;nucleus;zinc ion binding											0.367406	0.262172			0.295632	0.373569	0.448031	-0.131568
AAEL000137	conserved hypothetical protein	D				GO:0005215,GO:0005623,GO:0007582	ENSANGP00000015398 [Anopheles gambiae str. PEST]	Sodium:dicarboxylate symporter;Sodium/hydrogen exchanger	transporter activity;cell;physiological process											-0.540831			-0.173754	-0.477347	-0.455616	-0.383331	-0.130007
AAEL000138	NADH dehydrogenase, putative	REDOX/STRESS/MIT				GO:0003824,GO:0005489,GO:0005739,GO:0006118,GO:0043234	ENSANGP00000015544 [Anopheles gambiae str. PEST]	Complex 1 LYR protein	catalytic activity;electron transporter activity;mitochondrion;electron transport;protein complex				0.119258	0.31692	0.0321499	0.0564335	0.143784	-0.0488953	0.25857	0.416191	-0.126116	0.665796		-0.0610989			0.369075
AAEL000139	conserved hypothetical protein	CSR					putative odorant-binding protein OBPjj17 [Anopheles gambiae]
AAEL000140	conserved hypothetical protein	D				GO:0003676,GO:0005634,GO:0008270	ENSANGP00000004080 [Anopheles gambiae str. PEST]	Zinc finger, C2H2-type;Zinc finger, C2H2-subtype	nucleic acid binding;nucleus;zinc ion binding				-0.119715		0.624431			-0.224153	0.142853	0.206181	0.17365	-0.0997238				0.166396	-0.0480546
AAEL000141	immunophilin FKBP46, putative	D					hypothetical protein SPBC1711.05 [Schizosaccharomyces pombe 972h-]
AAEL000142	hypothetical protein	D				GO:0003676,GO:0005634,GO:0008270	PREDICTED: similar to zinc finger protein 91 (HPF7, HTF10) [Danio rerio]	Zinc finger, C2H2-type;Zinc finger, C2H2-subtype	nucleic acid binding;nucleus;zinc ion binding												0.0736002
AAEL000143	conserved hypothetical protein	D				GO:0008152,GO:0016787	ENSANGP00000010992 [Anopheles gambiae str. PEST]	Nitrilase/cyanide hydratase and apolipoprotein N-acyltransferase	metabolism;hydrolase activity			-0.276512	-0.416134	0.129369						-0.338429	-0.124735	-0.165088	-0.264242	-0.350608	-0.302911		-0.21525
AAEL000144	conserved hypothetical protein	CS				GO:0005576,GO:0006030,GO:0008061	ENSANGP00000026747 [Anopheles gambiae str. PEST]	Chitin binding Peritrophin-A	extracellular region;chitin metabolism;chitin binding
AAEL000145	hypothetical protein	U					GH26447p [Drosophila melanogaster]						-0.0878683
AAEL000146	nitrilase, putative	M				GO:0008152,GO:0016787			metabolism;hydrolase activity
AAEL000147	single-stranded DNA binding protein, putative	D				GO:0003677,GO:0005694,GO:0005739,GO:0006259,GO:0006950,GO:0007005,GO:0009719	ENSANGP00000003047 [Anopheles gambiae str. PEST]	Single-strand binding protein/Primosomal replication protein n;Single-stranded DNA binding	DNA binding;chromosome;mitochondrion;DNA metabolism;response to stress;mitochondrion organization and biogenesis;response to endogenous stimulus			0.524062	0.354171	0.390226	0.188517			-0.189953	0.245884	0.305956	0.125481			0.116132		0.0385362	-0.224342
AAEL000148	conserved hypothetical protein	D				GO:0003676,GO:0005634,GO:0008270			nucleic acid binding;nucleus;zinc ion binding											-0.101392	-0.163313	-0.273455		-0.129871		-0.253473	-0.362397
AAEL000149	sap30	D				GO:0003682,GO:0005515,GO:0006350,GO:0030528,GO:0050789	ENSANGP00000022106 [Anopheles gambiae str. PEST]		chromatin binding;protein binding;transcription;transcription regulator activity;regulation of biological process
AAEL000150	nitrilase, putative	M				GO:0008152,GO:0016787	ENSANGP00000010981 [Anopheles gambiae str. PEST]	Nitrilase/cyanide hydratase and apolipoprotein N-acyltransferase	metabolism;hydrolase activity
AAEL000151	conserved hypothetical protein	U
AAEL000152	conserved hypothetical protein	D					CG14870-PA [Drosophila melanogaster]	B9
AAEL000153	conserved hypothetical protein	D				GO:0003824,GO:0006519	ENSANGP00000010429 [Anopheles gambiae str. PEST]	DOMON;DOMON related	catalytic activity;amino acid and derivative metabolism
AAEL000154	conserved hypothetical protein	U					ENSANGP00000021913 [Anopheles gambiae str. PEST]													0.219149				-0.0740968	-0.158239
AAEL000155	hypothetical protein	D				GO:0005515,GO:0006355,GO:0008270	Helicase, C-terminal:DEAD/DEAH box helicase, N-terminal [Xanthobacter autotrophicus Py2]		protein binding;regulation of transcription\, DNA-dependent;zinc ion binding
AAEL000156	conserved hypothetical protein	D				GO:0005886,GO:0007165,GO:0007610,GO:0009628,GO:0009653,GO:0030154	ENSANGP00000015361 [Anopheles gambiae str. PEST]	Vascular cell adhesion molecule-1;Adenovirus fibre protein;Immunoglobulin I-set;Immunoglobulin V-set;Immunoglobulin;Immunoglobulin-like	plasma membrane;signal transduction;behavior;response to abiotic stimulus;morphogenesis;cell differentiation
AAEL000157	hypothetical protein	D				GO:0003676,GO:0005634,GO:0008270		Zinc finger, C2H2-type	nucleic acid binding;nucleus;zinc ion binding											0.148155	0.148577	-0.202781		0.144063		-0.235611	-0.492868
AAEL000158	t-box transcription factor tbx2	RTT				GO:0003700,GO:0005634,GO:0006350,GO:0007275,GO:0009653,GO:0030528,GO:0050789		Transcription factor, T-box	transcription factor activity;nucleus;transcription;development;morphogenesis;transcription regulator activity;regulation of biological process
AAEL000159	nipsnap	D					ENSANGP00000014771 [Anopheles gambiae str. PEST]	NIPSNAP				-0.30769	-0.0244935	0.457833	-0.536244	0.0873573		0.343708	0.481373	-0.182142	-0.243521	-0.143893	-0.119482	-0.157711	-0.200171		-0.283047
AAEL000160	hypothetical protein	U											-0.612623	0.0863736	-0.667043	-0.340802	-0.452172	-0.25607		-0.0910148	-0.273105	-0.296214	-0.329897				-0.177359
AAEL000161	conserved hypothetical protein	D				GO:0015031,GO:0016043,GO:0030234	ENSANGP00000003257 [Anopheles gambiae str. PEST]	RUN;RabGAP/TBC	protein transport;cell organization and biogenesis;enzyme regulator activity				-0.444013			-0.694421	-0.616982
AAEL000162	gustatory receptor 43a	CSR				GO:0004872,GO:0005623,GO:0007582	ENSANGP00000017595 [Anopheles gambiae str. PEST]		receptor activity;cell;physiological process
AAEL000163	mitochondrial inner membrane protein translocase, 22kD-subunit, putative	REDOX/STRESS/MIT				GO:0005215,GO:0005739,GO:0015031,GO:0016043,GO:0043234	ENSANGP00000014763 [Anopheles gambiae str. PEST]	Mitochondrial import inner membrane translocase, subunit Tim17/22	transporter activity;mitochondrion;protein transport;cell organization and biogenesis;protein complex			-0.242645	0.145516	0.252792	-0.0409285				0.287367	-0.362459	0.223423		-0.277792		-0.261596	-0.255707	0.254148
AAEL000164	d-amino acid oxidase	TRP				GO:0006118,GO:0016491	ENSANGP00000020495 [Anopheles gambiae str. PEST]	D-amino acid oxidase;FAD dependent oxidoreductase	electron transport;oxidoreductase activity			-0.395888	0.681435			0.353049		-0.396171	0.710969				0.395888
AAEL000165	conserved hypothetical protein	D					putative salivary Cysch secreted peptide [Aedes albopictus]													0.307133	0.360793	0.37985	0.651629	0.617297	0.751142	0.740449	1.02191
AAEL000166	conserved hypothetical protein	U					ENSANGP00000029294 [Anopheles gambiae str. PEST]
AAEL000167	hypothetical protein	U					CG14438-PB, isoform B [Drosophila melanogaster]					0.220452	-0.40599						-0.520652	-0.314943	0.222309	-0.294617	0.0238905		-0.289556	-0.568366	-0.1759
AAEL000168	conserved hypothetical protein	D					ENSANGP00000021241 [Anopheles gambiae str. PEST]	Thrombospondin, type I
AAEL000169	t-box transcription factor tbx2	RTT				GO:0003700,GO:0005634,GO:0006350,GO:0007275,GO:0009653,GO:0030528,GO:0050789	optomotor-blind	Transcription factor, T-box	transcription factor activity;nucleus;transcription;development;morphogenesis;transcription regulator activity;regulation of biological process
AAEL000170	hypothetical protein	D				GO:0003676,GO:0005488,GO:0005634	CG10321 [Drosophila simulans]	Zinc finger, C2H2-type;Zinc finger, AD-type	nucleic acid binding												-0.0569988	-0.182326			-0.197211
AAEL000171	hypothetical protein	D				GO:0003676,GO:0005634,GO:0008270	CG14438-PB, isoform B [Drosophila melanogaster]		nucleic acid binding;nucleus;zinc ion binding
AAEL000172	hypothetical protein	D				GO:0003676,GO:0005515,GO:0005634,GO:0006355,GO:0008270	ENSANGP00000011710 [Anopheles gambiae str. PEST]		nucleic acid binding;protein binding;nucleus;regulation of transcription\, DNA-dependent;zinc ion binding											0.305531		0.205773			0.199358	0.576881	0.183648
AAEL000173	chromatin assembly factor-I p150 subunit, putative	D					ENSANGP00000014548 [Anopheles gambiae str. PEST]
AAEL000174	retinal protein	D				GO:0004872,GO:0007582	ENSANGP00000004777 [Anopheles gambiae str. PEST]	GMP-PDE, delta subunit	receptor activity;physiological process
AAEL000175	translation initiation factor 3, subunit S8, putative	RTT				GO:0005737,GO:0005829,GO:0006412,GO:0008135,GO:0043234,GO:0050789	ENSANGP00000017513 [Anopheles gambiae str. PEST]	Eukaryotic translation initiation factor 3 subunit 8, N-terminal;Proteasome component region PCI	cytoplasm;cytosol;protein biosynthesis;translation factor activity\, nucleic acid binding;protein complex;regulation of biological process				0.247424	0.249071	0.449474	0.302859	0.310865	0.199262	0.245466		-0.312989	-0.232684		-0.184366	-0.328263	0.0517412	-0.363303
AAEL000176	conserved hypothetical protein	U					ENSANGP00000003548 [Anopheles gambiae str. PEST]
AAEL000177	conserved hypothetical protein	D				GO:0003676,GO:0005634	LD45662p [Drosophila melanogaster]	Zinc finger, CCCH-type;Prolinech region	nucleic acid binding;nucleus			-0.171221		-0.204565	-0.376678			-0.512324	-0.524765	0.261132	0.200216		0.171221	0.250415	0.253315	0.689803	-0.882263
AAEL000178	ubiquinone/menaquinone biosynthesis methyltransferase	D				GO:0009058,GO:0016740	ENSANGP00000018068 [Anopheles gambiae str. PEST]	Ubiquinone/menaquinone biosynthesis methyltransferase;UbiE/COQ5 methyltransferase;Methyltransferase type 11;Methyltransferase type 12;SAM (and some other nucleotide) binding motif	biosynthesis;transferase activity				0.642448	0.609302	0.447565	0.155094	0.279409		0.616917	0.253091	0.162692	-0.183008		0.114975	0.2587	0.320962	-0.0960834
AAEL000179	ubiquitin-conjugating enzyme E2 l	D				GO:0003824,GO:0006464,GO:0019538	ENSANGP00000021451 [Anopheles gambiae str. PEST]	Ubiquitin-conjugating enzyme, E2	catalytic activity;protein modification;protein metabolism
AAEL000180	mitochondrial ribosomal protein, L17, putative	REDOX/STRESS/MIT				GO:0005198,GO:0005739,GO:0005840	ENSANGP00000027051 [Anopheles gambiae str. PEST]		structural molecule activity;mitochondrion;ribosome			0.29385	0.38452	0.499742	0.22474	0.281095	0.184454	0.342647	0.427813	-0.426209	-0.36516	-0.194992	-0.272166	-0.0974707	-0.162688	-0.211904	-0.313223
AAEL000181	polybromo-1	D				GO:0005488,GO:0005634,GO:0006350,GO:0050789	ENSANGP00000004174 [Anopheles gambiae str. PEST]	Bromodomain;Bromo adjacent region;HMG1/2 (high mobility group) box	binding;nucleus;transcription;regulation of biological process				-1.09633	-0.612136	-0.303343	-0.467964		-0.910372	0.210849	0.0920733	-0.80095	-0.427199				-0.457315	0.443987
AAEL000182	conserved hypothetical protein	D				GO:0005740,GO:0006122,GO:0008121	ENSANGP00000017699 [Anopheles gambiae str. PEST]		mitochondrial envelope;;
AAEL000183	hypothetical protein	U					Sh3rf2 protein [Mus musculus]
AAEL000184	conserved hypothetical protein	U					ENSANGP00000011200 [Anopheles gambiae str. PEST]
AAEL000185	eukaryotic translation initiation factor	RTT				GO:0005509,GO:0005829,GO:0006412,GO:0008135,GO:0030234,GO:0050789	ENSANGP00000011246 [Anopheles gambiae str. PEST]	Translation initiation factor IF5;eIF4-gamma/eIF5/eIF2-epsilon	calcium ion binding;cytosol;protein biosynthesis;translation factor activity\, nucleic acid binding;enzyme regulator activity;regulation of biological process
AAEL000186	conserved hypothetical protein	U					ENSANGP00000013693 [Anopheles gambiae str. PEST]
AAEL000187	lim-kinase1	D				GO:0000166,GO:0004672,GO:0004871,GO:0005488,GO:0005515,GO:0006464,GO:0007010,GO:0007275,GO:0009653,GO:0016043,GO:0030154,GO:0050789	ENSANGP00000004775 [Anopheles gambiae str. PEST]	Protein kinase;LIM, zinc-binding;Tyrosine protein kinase;PDZ/DHR/GLGF	nucleotide binding;protein kinase activity;signal transducer activity;binding;protein binding;protein modification;cytoskeleton organization and biogenesis;development;morphogenesis;cell organization and biogenesis;cell differentiation;regulation of biolo
AAEL000188	elongase, putative	M				GO:0005623,GO:0006629,GO:0016740	ENSANGP00000022632 [Anopheles gambiae str. PEST]	GNS1/SUR4 membrane protein	cell;lipid metabolism;transferase activity			-0.152662	-0.323875	-0.664183		-0.489793	-0.308591	-0.264917	-0.803752				0.152662
AAEL000189	t-box transcription factor tbx2	RTT				GO:0003700,GO:0005634,GO:0006355	optomotor blind [Schistocerca americana]	Transcription factor, T-box	transcription factor activity;nucleus;regulation of transcription\, DNA-dependent
AAEL000190	trypsin	DIG				GO:0008233,GO:0019538	ENSANGP00000021196 [Anopheles gambiae str. PEST]	Peptidase S1 and S6, chymotrypsin/Hap;Peptidase S1A, chymotrypsin	peptidase activity;protein metabolism
AAEL000191	conserved hypothetical protein	U					ENSANGP00000011175 [Anopheles gambiae str. PEST]	Protein of unknown function DUF887, TLC-like;TRAM, LAG1 and CLN8 homology				-0.250372	-0.183391	-0.206115		0.234856							0.250372
AAEL000192	hypothetical protein	D					ENSANGP00000021241 [Anopheles gambiae str. PEST]	Thrombospondin, type I
AAEL000193	histone-lysine n-methyltransferase	RTT				GO:0005694,GO:0006259,GO:0006464,GO:0006996,GO:0016740,GO:0050789	ENSANGP00000016276 [Anopheles gambiae str. PEST]	Nuclear protein SET	chromosome;DNA metabolism;protein modification;organelle organization and biogenesis;transferase activity;regulation of biological process												0.216337	-0.285176	-0.450902	-0.235614	-0.227981	0.069276	-0.694968
AAEL000194	phosphatidylinositol 4-kinase	RTT				GO:0007165,GO:0008152,GO:0016301	ENSANGP00000026568 [Anopheles gambiae str. PEST]		signal transduction;metabolism;kinase activity			0.17886	0.0923708	0.120563		0.210046	0.145273		0.100728	-0.280607	-0.259702	-0.0722405	-0.272677			-0.222215	-0.324846
AAEL000195	conserved hypothetical protein	U					ENSANGP00000017791 [Anopheles gambiae str. PEST]
AAEL000196	conserved hypothetical protein	U					CG16771-PA [Drosophila melanogaster]
AAEL000197	hypothetical protein	D				GO:0003676,GO:0005634,GO:0008270	CG14438-PB, isoform B [Drosophila melanogaster]		nucleic acid binding;nucleus;zinc ion binding												-0.501004			-0.269561	-0.253649	0.247124	-0.6924
AAEL000198	conserved hypothetical protein	D				GO:0003676,GO:0008270	PREDICTED: similar to CG1677-PA [Apis mellifera]	Zinc finger, CCCH-type;Prolinech region	nucleic acid binding;zinc ion binding
AAEL000199	arginyl-tRNA synthetase	RTT				GO:0000166,GO:0003723,GO:0003824,GO:0005737,GO:0006139,GO:0006412,GO:0006519	ENSANGP00000017692 [Anopheles gambiae str. PEST]	Aminoacyl-tRNA synthetase, class I;Arginyl-tRNA synthetase, class Ic;Arginyl tRNA synthetase, N-terminal;DALR anticodon binding	nucleotide binding;RNA binding;catalytic activity;cytoplasm;nucleobase\, nucleoside\, nucleotide and nucleic acid metabolism;protein biosynthesis;amino acid and derivative metabolism				0.547029	0.549703		0.227037	-0.108865		0.722174	0.284548	0.146814	0.209389			-0.135696	0.241193
AAEL000200	conserved hypothetical protein	D					putative salivary Cysch secreted peptide [Aedes albopictus]						-0.542316	-0.74005					-0.519142	-0.43315	-0.120772	-0.36697	-0.483479	-0.536293	-0.164889	-0.387548	-0.226589
AAEL000201	DNA replication helicase dna2	RTT				GO:0003676,GO:0004518,GO:0005215,GO:0005623,GO:0006139,GO:0006259,GO:0006350,GO:0006810,GO:0006950,GO:0009719,GO:0016787,GO:0050789	ENSANGP00000002028 [Anopheles gambiae str. PEST]		nucleic acid binding;nuclease activity;transporter activity;cell;nucleobase\, nucleoside\, nucleotide and nucleic acid metabolism;DNA metabolism;transcription;transport;response to stress;response to endogenous stimulus;hydrolase activity;regulation of bi
AAEL000202	t-box protein	D				GO:0003700,GO:0005634,GO:0006350,GO:0007275,GO:0009653,GO:0030528,GO:0050789	ENSANGP00000014031 [Anopheles gambiae str. PEST]		transcription factor activity;nucleus;transcription;development;morphogenesis;transcription regulator activity;regulation of biological process
AAEL000203	trypsin	DIG				GO:0008233,GO:0019538	ENSANGP00000026788 [Anopheles gambiae str. PEST]	Peptidase S1 and S6, chymotrypsin/Hap;Peptidase S1A, chymotrypsin	peptidase activity;protein metabolism
AAEL000204	conserved hypothetical protein	U					ENSANGP00000012594 [Anopheles gambiae str. PEST]						-0.372785	0.133052	-0.323799		0.121867	-0.703788	0.455763	-0.279512	-0.61003	-0.21408		-0.539135	-0.353121	-0.577022	-0.715518
AAEL000205	conserved hypothetical protein	D					ENSANGP00000028440 [Anopheles gambiae str. PEST]	Somatomedin B
AAEL000206	ninjurin A, putative	D				GO:0007155,GO:0016021,GO:0042246	ENSANGP00000013659 [Anopheles gambiae str. PEST]	Ninjurin	cell adhesion;integral to membrane;tissue regeneration				0.27888	0.197676	-0.312796		-0.434155	-0.362309	0.162141
AAEL000207	hypothetical protein	U					strawberry notch CG1903-PB, isoform B [Drosophila melanogaster]
AAEL000208	copii-coated vesicle membrane protein P24	D				GO:0005215,GO:0005515,GO:0005794,GO:0015031,GO:0016023,GO:0016043	ENSANGP00000017729 [Anopheles gambiae str. PEST]	emp24/gp25L/p24;GOLD	transporter activity;protein binding;Golgi apparatus;protein transport;cytoplasmic membrane-bound vesicle;cell organization and biogenesis			0.0801195	0.106705	0.20925	-0.123376	0.134804		-0.0735689	0.2273	-0.185041		0.104977	-0.0801195		-0.198344	-0.107043	0.19122
AAEL000209	conserved hypothetical protein	D					ENSANGP00000028440 [Anopheles gambiae str. PEST]	Somatomedin B
AAEL000210	mitochondrial ribosomal protein L2	REDOX/STRESS/MIT				GO:0003676,GO:0005198,GO:0005739,GO:0005840,GO:0006412	ENSANGP00000025078 [Anopheles gambiae str. PEST]	Ribosomal protein L2	nucleic acid binding;structural molecule activity;mitochondrion;ribosome;protein biosynthesis			0.0751356	0.700903	0.499431	0.339443	0.465599	0.422228	0.286892	0.612222	0.187815	0.32497	0.216451	-0.0751356	0.386672	0.273668		0.158515
AAEL000211	conserved hypothetical protein	U											0.103621	0.528687					0.163364	-0.438234	0.316627	0.47711		0.177594	0.112924	0.190199	0.444672
AAEL000212	conserved hypothetical protein	D				GO:0000003,GO:0000166,GO:0003676,GO:0003824,GO:0005634,GO:0006350,GO:0007165,GO:0009653,GO:0009790,GO:0019538,GO:0030154,GO:0050789	ENSANGP00000010592 [Anopheles gambiae str. PEST]	Helicase, C-terminal	reproduction;nucleotide binding;nucleic acid binding;catalytic activity;nucleus;transcription;signal transduction;morphogenesis;embryonic development;protein metabolism;cell differentiation;regulation of biological process
AAEL000213	d-amino acid oxidase	TRP				GO:0000166,GO:0003824,GO:0004672,GO:0006118,GO:0006464,GO:0006519	ENSANGP00000012045 [Anopheles gambiae str. PEST]	D-amino acid oxidase;FAD dependent oxidoreductase	nucleotide binding;catalytic activity;protein kinase activity;electron transport;protein modification;amino acid and derivative metabolism											-0.355746		-1.11704	1.01916	0.175012	0.618781	-0.0620926	0.41342
AAEL000214	vacuolar protein sorting (vps33)	D				GO:0005515,GO:0005623,GO:0005764,GO:0005829,GO:0006810,GO:0006996,GO:0007275,GO:0009058,GO:0015031,GO:0016043,GO:0019748	ENSANGP00000014711 [Anopheles gambiae str. PEST]	Sec1-like protein	protein binding;cell;lysosome;cytosol;transport;organelle organization and biogenesis;development;biosynthesis;protein transport;cell organization and biogenesis;secondary metabolism
AAEL000215	ribonuclease P, 29kD-subunit, putative	RTT				GO:0004540,GO:0008033	ENSANGP00000014077 [Anopheles gambiae str. PEST]	Ribonuclease P subunit	ribonuclease activity;tRNA processing
AAEL000216	elongase, putative	M				GO:0005623,GO:0006629,GO:0016740	ENSANGP00000014792 [Anopheles gambiae str. PEST]	GNS1/SUR4 membrane protein	cell;lipid metabolism;transferase activity
AAEL000217	serine/threonine protein kinase	D				GO:0000166,GO:0004672,GO:0004871,GO:0006464,GO:0007165,GO:0007582,GO:0008219,GO:0008283,GO:0050789	ENSANGP00000003262 [Anopheles gambiae str. PEST]	Protein kinase;Tyrosine protein kinase	nucleotide binding;protein kinase activity;signal transducer activity;protein modification;signal transduction;physiological process;cell death;cell proliferation;regulation of biological process											0.358437	0.410789	0.442902		0.439602	0.300659	0.362472	0.180674
AAEL000218	hypothetical protein	U					hypothetical protein [Oryza sativa (japonica cultivar-group)]
AAEL000219	lactoylglutathione lyase	M				GO:0003824,GO:0008152	ENSANGP00000022030 [Anopheles gambiae str. PEST]	Glyoxalase/bleomycin resistance protein/dioxygenase	catalytic activity;metabolism			1.94702	0.525293	0.330961	0.693302	-0.422965	-0.991056	2.00287	0.73418	1.64096						1.64454	1.03319
AAEL000220	conserved hypothetical protein	D				GO:0008092	GA12678-PA [Drosophila pseudoobscura]	Aminoacyl-tRNA synthetase, class I	cytoskeletal protein binding
AAEL000221	mediator complex, subunit, putative	D				GO:0005634	ENSANGP00000015908 [Anopheles gambiae str. PEST]		nucleus
AAEL000222	conserved hypothetical protein	U					ENSANGP00000015739 [Anopheles gambiae str. PEST]	Machado-Joseph disease protein MJD				0.674631	0.238122	-0.101963	-0.22561	-0.233151	-0.456851		0.14107	0.315548	0.450818		-0.701966		-0.359096	-0.125699	0.218118
AAEL000223	alpha-glucosidase	DIG				GO:0005783,GO:0005975,GO:0016787,GO:0043234	GA11275-PA [Drosophila pseudoobscura]	Glycoside hydrolase, family 31	endoplasmic reticulum;carbohydrate metabolism;hydrolase activity;protein complex				-1.10052	-0.846101		-1.20653	-0.480473	0.179565	-0.185898
AAEL000224	serine protease	I				GO:0008233,GO:0019538	ENSANGP00000017184 [Anopheles gambiae str. PEST]	Peptidase S1 and S6, chymotrypsin/Hap;Immunoglobulin/major histocompatibility complex;Peptidase S1A, chymotrypsin	peptidase activity;protein metabolism
AAEL000225	oviductin	M				GO:0008233,GO:0009607,GO:0019538	ENSANGP00000028900 [Anopheles gambiae str. PEST]	Peptidase S1 and S6, chymotrypsin/Hap;Peptidase S1A, chymotrypsin	peptidase activity;response to biotic stimulus;protein metabolism
AAEL000226	conserved hypothetical protein	REDOX/STRESS/MIT				GO:0031072	GA19786-PA [Drosophila pseudoobscura]	Heat shock protein DnaJ, N-terminal	heat shock protein binding				-0.0903643		-0.191224				-0.20116			0.0854341				-0.193429	-0.0267933
AAEL000227	epithelial membrane protein	I	SCRB8	SCR	SCRB	GO:0003824,GO:0004872,GO:0005764,GO:0005886,GO:0006950,GO:0007275,GO:0007582,GO:0008152,GO:0008219,GO:0009536,GO:0009605,GO:0009607,GO:0043234	ENSANGP00000012643 [Anopheles gambiae str. PEST]	CD36 antigen;Adhesion molecule CD36	catalytic activity;receptor activity;lysosome;plasma membrane;response to stress;development;physiological process;metabolism;cell death;;response to external stimulus;response to biotic stimulus;protein complex	Aaeg:N27774		0.0444534	-0.391934	-0.255735	0.181973	-0.254217	-0.196272	-0.689012	0.146638	-0.308662	-0.145989	-0.237523	-0.277223	-0.567284	-0.432454	-0.683421	-0.283678
AAEL000228	leucine rich repeat containing protein	I				GO:0008092	CG1399-PB, isoform B [Drosophila melanogaster]		cytoskeletal protein binding															-0.21707
AAEL000229	conserved hypothetical protein	D					salivary vasodilatory protein precursor [Aedes aegypti]														-0.961159	-0.639398		-0.816439	-0.282961	-0.890002
AAEL000230	conserved hypothetical protein	U					ENSANGP00000013100 [Anopheles gambiae str. PEST]						0.113343	0.239984			-0.341472			0.133088	-0.0749897	-0.107587			-0.437679		-1.20452
AAEL000231	oligopeptidase	PROT				GO:0008233,GO:0015031,GO:0016043,GO:0019538	CG11771-PA [Drosophila melanogaster]	Peptidase M3A and M3B, thimet/oligopeptidase F	peptidase activity;protein transport;cell organization and biogenesis;protein metabolism			0.669997	0.435298	1.00366	0.954799	0.83453						0.434965	0.767657	0.395647	-0.368227	-0.536387
AAEL000232	forkhead box protein (AaegFOXX)	D
AAEL000233	membrane-associated guanylate kinase, putative	D				GO:0000003,GO:0005102,GO:0005198,GO:0005515,GO:0005623,GO:0005737,GO:0005856,GO:0005886,GO:0007010,GO:0007028,GO:0007049,GO:0007267,GO:0007275,GO:0007582,GO:0008283,GO:0009653,GO:0009790,GO:0015031,GO:0016043,GO:0016301,GO:0019538,GO:0030154,GO:0050789	discs large 1 CG1725-PB, isoform B [Drosophila melanogaster]		reproduction
AAEL000234	antigen CD36, putative	I				GO:0007155,GO:0016020	ENSANGP00000012652 [Anopheles gambiae str. PEST]	CD36 antigen;Peptidase S14, ClpP	cell adhesion;membrane			0.429773	0.708296	0.143423	0.181474	0.220791	-0.388304	0.058603	0.90135	-0.25233	0.0141405	-0.256892	-0.351092	-0.554206	-0.444833	-0.405956	0.237934
AAEL000235	hypothetical protein	U					ENSANGP00000013263 [Anopheles gambiae str. PEST]					0.0489448	0.300246	0.140862	-0.193416		-0.390658	0.155573	0.248718	-0.153727	0.216276		-0.110909	-0.198751	-0.33129	-0.0763061	0.0631853
AAEL000236	hypothetical protein	D				GO:0003700,GO:0005634,GO:0006350,GO:0050789	ENSANGP00000026956 [Anopheles gambiae str. PEST]	Fork head transcription factor;Antifreeze protein, type I;Histamine H3 receptor	transcription factor activity;nucleus;transcription;regulation of biological process
AAEL000237	hypothetical protein	D					putative transcriptional regulator, Crp/Fnr family [Desulfovibrio desulfuricans G20]
AAEL000238	serine protease	I				GO:0008233,GO:0019538	CG8172-PA [Drosophila melanogaster]	Peptidase S1 and S6, chymotrypsin/Hap;Peptidase S1A, chymotrypsin;Peptidase S1A, prothrombin/plasminogen	peptidase activity;protein metabolism
AAEL000239	clathrin coat assembly protein	TRP				GO:0006886,GO:0030125	ENSANGP00000022043 [Anopheles gambiae str. PEST]	Clathrin adaptor complex, medium chain	intracellular protein transport;
AAEL000240	conserved hypothetical protein	U					ENSANGP00000025105 [Anopheles gambiae str. PEST]					-0.153733		0.13769	-0.378944		-0.250724	-0.242639	0.187043	-0.196886	-0.427592	-0.352808	0.153733	-0.354551		-0.400585	-0.632824
AAEL000241	conserved hypothetical protein	D				GO:0005102,GO:0005623,GO:0005829,GO:0007582,GO:0009607,GO:0016787	ENSANGP00000019270 [Anopheles gambiae str. PEST]	Proteasome component region PCI	receptor binding;cell;cytosol;physiological process;response to biotic stimulus;hydrolase activity									0.572465			0.141838			-0.691505	-0.212451	0.0850112
AAEL000242	voltage-gated potassium channel	TRP				GO:0000003,GO:0005216,GO:0005515,GO:0005623,GO:0005886,GO:0006811,GO:0007582,GO:0007610,GO:0009628,GO:0043234	Shaker [Drosophila melanogaster]	Voltage-dependent potassium channel;Shaker voltage-gated K+ channel;Kv channel;Kv9 voltage-gated K+ channel;Kv1.1 voltage-gated K+ channel;Sodium:dicarboxylate symporter;K+ channel tetramerisation;Ion transport;Ion transport 2, bacterial;K+ channel, pore	reproduction;ion channel activity;protein binding;cell;plasma membrane;ion transport;physiological process;behavior;response to abiotic stimulus;protein complex
AAEL000243	leucinech transmembrane protein	I				GO:0000166,GO:0003677,GO:0004518,GO:0006259,GO:0007267,GO:0007582,GO:0016740	CG40500-PA.3 [Drosophila melanogaster]	Leucinech repeat;Leucinech repeat, SDS22;Leucinech repeat, typical subtype	nucleotide binding;DNA binding;nuclease activity;DNA metabolism;cell-cell signaling;physiological process;transferase activity
AAEL000244	alpha(1,3)fucosyltransferase	M				GO:0006486,GO:0008417,GO:0016020	putative core 3-alpha-L-fucosyltransferase [Glossina morsitans]	Serum albumin;Glycosyl transferase, family 10	;membrane
AAEL000245	conserved hypothetical protein	D					ENSANGP00000015487 [Anopheles gambiae str. PEST]	Rab5-interacting				0.275829	0.15165	0.321086		0.110351	0.234359	0.118692		-0.209979	-0.311419	-0.15737	-0.275107			-0.282325	-0.238269
AAEL000246	cadherin	CS				GO:0000166,GO:0004672,GO:0004872,GO:0005198,GO:0005509,GO:0005515,GO:0005886,GO:0006464,GO:0007165,GO:0007275,GO:0009653,GO:0040007,GO:0050789	ENSANGP00000001238 [Anopheles gambiae str. PEST]	EGF-like region;Cadherin;EGF-like, laminin;GPCR, family 2, secretin-like;EGF-like, type 2;EGF-like;Laminin G, subdomain 1;Laminin G, subdomain 2;Hormone receptor, extracellular;GPS;Laminin G;EGF-like, type 3	nucleotide binding;protein kinase activity;receptor activity;structural molecule activity;calcium ion binding;protein binding;plasma membrane;protein modification;signal transduction;development;morphogenesis;growth;regulation of biological process
AAEL000247	hypothetical protein	U					predicted protein [Anopheles gambiae]
AAEL000248	GTP binding protein	RTT				GO:0000166,GO:0006412	ENSANGP00000015785 [Anopheles gambiae str. PEST]	Protein synthesis factor, GTP-binding;Ras GTPase;Elongation factor Tu, domain 2;Elongation factor Tu, C-terminal	nucleotide binding;protein biosynthesis			0.22933	0.297878	0.266981	0.122817	0.140053	0.149439	0.076044	0.221092	-0.352621	-0.186977	-0.323508	-0.22933	-0.359022	-0.433964	-0.303831	-0.398001
AAEL000249	mitochondrial carrier protein	REDOX/STRESS/MIT				GO:0005215,GO:0005488,GO:0005739,GO:0006810	ENSANGP00000008046 [Anopheles gambiae str. PEST]	Adenine nucleotide translocator 1;Mitochondrial carrier protein;Mitochondrial substrate carrier	transporter activity;binding;mitochondrion;transport															0.589783			0.265234
AAEL000250	forkhead box protein (AaegFOXP)	D				GO:0003700,GO:0005634,GO:0006355,GO:0043565	ENSANGP00000017344 [Anopheles gambiae str. PEST]	Zinc finger, C2H2-type;Fork head transcription factor;Histamine H3 receptor;Prolinech region	transcription factor activity;nucleus;regulation of transcription\, DNA-dependent;sequence-specific DNA binding
AAEL000251	conserved hypothetical protein	U					ENSANGP00000010045 [Anopheles gambiae str. PEST]
AAEL000252	hypothetical protein	PROT					trypsin-like serine protease [Ctenocephalides felis]	Peptidase S1 and S6, chymotrypsin/Hap;Peptidase S1A, chymotrypsin;Peptidase S1B, glutamyl endopeptidase I														-0.500283		-0.549001			-0.81089
AAEL000253	Trypsin, putative	DIG				GO:0008233,GO:0009607,GO:0019538	ENSANGP00000028900 [Anopheles gambiae str. PEST]	Peptidase S1 and S6, chymotrypsin/Hap;Peptidase S1A, chymotrypsin	peptidase activity;response to biotic stimulus;protein metabolism
AAEL000254	nuclear factor i	D				GO:0003700,GO:0005634,GO:0006350,GO:0007275,GO:0050789	ENSANGP00000017430 [Anopheles gambiae str. PEST]	Dwarfin protein, A	transcription factor activity;nucleus;transcription;development;regulation of biological process
AAEL000255	conserved hypothetical protein	I				GO:0007242	ENSANGP00000013117 [Anopheles gambiae str. PEST]	SH2 motif;SOCS protein, C-terminal	intracellular signaling cascade
AAEL000256	epithelial membrane protein	I	SCRB9	SCR	SCRB	GO:0003824,GO:0004872,GO:0005764,GO:0005886,GO:0006950,GO:0007275,GO:0007582,GO:0008152,GO:0008219,GO:0009536,GO:0009605,GO:0009607,GO:0043234	ENSANGP00000012656 [Anopheles gambiae str. PEST]	CD36 antigen;Lysosome membrane protein II;Adhesion molecule CD36;Cytochrome c-type biogenesis protein CcmF	catalytic activity;receptor activity;lysosome;plasma membrane;response to stress;development;physiological process;metabolism;cell death;;response to external stimulus;response to biotic stimulus;protein complex	Aaeg:N27779							-0.0717824			-0.526363	-0.165909	0.274041	-0.288207	-0.137678	-0.120602	-0.463334	0.325766
AAEL000257	hypothetical protein	U												0.352373		0.152998			0.33589	-0.647947	0.0795235			-0.260928	-0.551405	-0.415176	-0.85989
AAEL000258	magnesium ion binding, cytoplasm, lipid metabolic process, 5'-nucleotidase activity, lipase activty	M	M									0.416502	0.42169	0.436372	0.938775	0.48751	0.74242	0.423863	0.364944	0.573764	0.393221	0.506894	0.409162	0.470526	0.507719	0.93884	0.539171
AAEL000259	superoxide dismutase	I				GO:0004785,GO:0006801,GO:0046872	cytoplasmic Cu/Zn superoxide dismutase [Trichinella pseudospiralis]	Superoxide dismutase, copper/zinc binding	copper\, zinc superoxide dismutase activity;;metal ion binding
AAEL000260	conserved hypothetical protein	U					ENSANGP00000025072 [Anopheles gambiae str. PEST]
AAEL000261	hypothetical protein	D				GO:0003676,GO:0005634,GO:0008270	PREDICTED: similar to zinc finger protein 91 (HPF7, HTF10) [Danio rerio]	Zinc finger, C2H2-type;Zinc finger, C2H2-subtype	nucleic acid binding;nucleus;zinc ion binding
AAEL000262	conserved hypothetical protein	D				GO:0000166,GO:0003676,GO:0004518,GO:0004672,GO:0006139,GO:0006350,GO:0006464	ENSANGP00000007317 [Anopheles gambiae str. PEST]	Protein kinase	nucleotide binding;nucleic acid binding;nuclease activity;protein kinase activity;nucleobase\, nucleoside\, nucleotide and nucleic acid metabolism;transcription;protein modification											-0.511727	0.20881	-0.183488	-0.44399		0.21186	-0.125802	-0.798881
AAEL000263	conserved hypothetical protein	D				GO:0003676,GO:0005634,GO:0008270	LD36562p [Drosophila melanogaster]	Zinc finger, C2H2-type	nucleic acid binding;nucleus;zinc ion binding
AAEL000264	phopholipase d	M				GO:0006629,GO:0007165,GO:0016787	ENSANGP00000000545 [Anopheles gambiae str. PEST]	Phox-like;Phospholipase D/Transphosphatidylase	lipid metabolism;signal transduction;hydrolase activity			-0.334224	0.0863297	0.0519045	0.12846	0.327073	0.356242	0.0480935	0.0865906	0.430725	0.212412	0.448631		0.402858	0.483752	0.487358	0.408311
AAEL000265	ubiquitin conjugating enzyme, putative	D				GO:0000003,GO:0003824,GO:0006464,GO:0030154	ENSANGP00000013744 [Anopheles gambiae str. PEST]	Ubiquitin-conjugating enzyme, E2	reproduction;catalytic activity;protein modification;cell differentiation
AAEL000266	g-protein coupled receptor	D				GO:0004872,GO:0005623,GO:0007165	ENSANGP00000021668 [Anopheles gambiae str. PEST]	Rhodopsin-like GPCR superfamily;5-Hydroxytryptamine 6 receptor	receptor activity;cell;signal transduction
AAEL000267	conserved hypothetical protein	D				GO:0003824,GO:0006629	ENSANGP00000021063 [Anopheles gambiae str. PEST]		catalytic activity
AAEL000268	lipase	M				GO:0006629,GO:0016787	ENSANGP00000012504 [Anopheles gambiae str. PEST]	Peptidase M14, carboxypeptidase A;Lipase;Esterase/lipase/thioesterase	lipid metabolism;hydrolase activity
AAEL000269	conserved hypothetical protein	U					ENSANGP00000021873 [Anopheles gambiae str. PEST]					-0.305389	-0.226867	-0.621573	0.253256			-0.363087	-0.330963	-0.862276	-0.330811	-0.98568	0.305389	-0.240488	-0.234324	-0.358416	-0.912446
AAEL000270	26S proteasome regulatory subunit 7, psd7	D				GO:0005622,GO:0007049,GO:0007582,GO:0008233,GO:0009056,GO:0019538,GO:0043234,GO:0050789	ENSANGP00000013949 [Anopheles gambiae str. PEST]	Mov34/MPN/PAD-1	intracellular;cell cycle;physiological process;peptidase activity;catabolism;protein metabolism;protein complex;regulation of biological process				0.133467	0.1732	0.245296			0.178398	0.190702	-0.206167	-0.184298		-0.232385		-0.100477		-0.182946
AAEL000271	gamma-glutamyl hydrolase, putative	M				GO:0008233,GO:0019538			peptidase activity					-0.254602	-0.286451	-0.541212	-0.612659	0.508381	0.351229	0.714799	-0.0453717		-0.0882401	1.85883	0.233636	0.807207	-0.553378
AAEL000272	conserved hypothetical protein	RTT					ENSANGP00000014089 [Anopheles gambiae str. PEST]	RNA-binding region RNP-1 (RNA recognition motif)
AAEL000273	inositol triphosphate 3-kinase c	M				GO:0005975,GO:0006810,GO:0006811,GO:0008152,GO:0016301	CG10082-PA, isoform A [Drosophila melanogaster]	Phosphofructokinase;Inositol polyphosphate kinase	carbohydrate metabolism;transport;ion transport;metabolism;kinase activity
AAEL000274	superoxide dismutase	I				GO:0003824,GO:0005488,GO:0005737,GO:0007275,GO:0008152,GO:0009607,GO:0016209,GO:0016265			catalytic activity;binding;cytoplasm;development;metabolism;response to biotic stimulus;antioxidant activity;death			0.217225	0.541953	0.363741	0.827073	0.195617	0.575574	0.277053	0.330143	0.497271	0.30246	0.21054	-0.083421	0.0738341	0.313947	0.411591	0.30584
AAEL000275	hypothetical protein	D					cyclic nucleotide-binding domain containing protein [Tetrahymena thermophila SB210]
AAEL000276	conserved hypothetical protein	U					ENSANGP00000009171 [Anopheles gambiae str. PEST]	Lissencephaly type-1-like homology motif				-0.104429	-0.0514453	-0.0375114	-0.0837274				-0.154017	0.173627	0.185959		0.104429		-0.133006	0.273122	-0.313049
AAEL000277	conserved hypothetical protein	I					lysozyme i-1 [Anopheles gambiae]	Eggshell protein;Destabilase
AAEL000278	poly(p)/atp nad kinase	RTT				GO:0003951,GO:0008152	ENSANGP00000012587 [Anopheles gambiae str. PEST]	Glycoside hydrolase, family 5;ATP-NAD/AcoX kinase	NAD+ kinase activity;metabolism			-0.311756	-0.0988306	-0.162268	0.205648				-0.406252	-0.189425	-0.198003				0.244465
AAEL000279	N-formylmethionylaminoacyl-tRNA deformylase, putative	D				GO:0006412,GO:0006464,GO:0016787	ENSANGP00000017891 [Anopheles gambiae str. PEST]	Formylmethionine deformylase	protein biosynthesis;protein modification;hydrolase activity				0.308129	0.318508	0.423194		0.138693		-0.48995	-0.140511		-0.331842			-0.274975	-0.190143	-0.739304
AAEL000280	hypothetical protein	U					ENSANGP00000028905 [Anopheles gambiae str. PEST]	BRO, N-terminal
AAEL000281	conserved hypothetical protein	U					ENSANGP00000021877 [Anopheles gambiae str. PEST]													-0.205732				0.466633	0.299361	0.0629272	-0.523621
AAEL000282	syntaxin, putative	TRP				GO:0005215,GO:0005886,GO:0006810,GO:0007267,GO:0015031,GO:0016043	ENSANGP00000021795 [Anopheles gambiae str. PEST]	Target SNARE coiled-coil region	transporter activity;plasma membrane;transport;cell-cell signaling;protein transport;cell organization and biogenesis
AAEL000283	galactose-specific C-type lectin, putative	I				GO:0005529	putative salivary C type lectin [Aedes albopictus]	C-type lectin	sugar binding
AAEL000284	conserved hypothetical protein	D				GO:0004872,GO:0007165,GO:0016740	ENSANGP00000021737 [Anopheles gambiae str. PEST]	Methyltransferase type 11;Methyltransferase type 12;SAM (and some other nucleotide) binding motif	receptor activity;signal transduction;transferase activity			-0.0650192	-0.723824	0.113201	0.136546		0.182477	0.135537	-0.995336	-0.411222	-1.0111	-0.0896131	0.0650192	0.347853	0.0691759	-0.169898	-0.655338
AAEL000285	conserved hypothetical protein	D					AT16442p [Drosophila melanogaster]
AAEL000286	conserved hypothetical protein	PROT					ENSANGP00000026517 [Anopheles gambiae str. PEST]	Carboxylesterase, type B;Esterase/lipase/thioesterase
AAEL000287	hypothetical protein	D				GO:0003676,GO:0005634,GO:0008270	PREDICTED: similar to zinc finger protein 266 [Bos taurus]	Zinc finger, C2H2-type;Zinc finger, C2H2-subtype	nucleic acid binding;nucleus;zinc ion binding											-0.423462	0.0960839	-0.321755		-0.192191	-0.313787	-0.345968	-0.75225
AAEL000288	conserved hypothetical protein	D				GO:0008083	ENSANGP00000021846 [Anopheles gambiae str. PEST]	PTN/MK heparin-binding protein
AAEL000289	conserved hypothetical protein	D					ENSANGP00000013644 [Anopheles gambiae str. PEST]	Ankyrin				-0.355644	-0.727138				-0.375765			-0.279214	-0.766818	0.219201	0.355644				0.0871516
AAEL000290	conserved hypothetical protein	D				GO:0003676,GO:0005488,GO:0005634	ENSANGP00000023646 [Anopheles gambiae str. PEST]	Zinc finger, C2H2-type	nucleic acid binding;binding;nucleus
AAEL000291	Vacuolar ATP synthase 16 kDa proteolipid subunit	TRP				GO:0005215,GO:0005623,GO:0005773,GO:0006091,GO:0006139,GO:0006811,GO:0009058,GO:0016787,GO:0043234	V-ATPase C-subunit [Aedes aegypti]	Vacuolar H+-transporting two-sector ATPase, C subunit;Acriflavin resistance protein;H+-transporting two-sector ATPase, C subunit	transporter activity;cell;vacuole;generation of precursor metabolites and energy;nucleobase\, nucleoside\, nucleotide and nucleic acid metabolism;ion transport;biosynthesis;hydrolase activity;protein complex			-0.0869914	-0.350503	0.190096	0.173535	0.224842	0.515103	0.145353	-0.105768	0.206039	0.127009	0.180284	0.0869914	0.164338	0.237929	0.382909	-0.0528541
AAEL000292	conserved hypothetical protein	D				GO:0003676,GO:0005634,GO:0008270	ENSANGP00000023162 [Anopheles gambiae str. PEST]	Zinc finger, C2H2-type;Zinc finger, C2H2-subtype	nucleic acid binding;nucleus;zinc ion binding
AAEL000293	ebna2 binding protein P100	D				GO:0003676,GO:0004518,GO:0005515,GO:0005622,GO:0006350,GO:0030528,GO:0043234	ENSANGP00000021797 [Anopheles gambiae str. PEST]	Staphylococcus nuclease (SNase-like);Maternal tudor protein;Tudor	nucleic acid binding;nuclease activity;protein binding;intracellular;transcription;transcription regulator activity;protein complex			-0.219701	0.276603	0.307614	-0.257782	-0.441298		-0.451849	0.479093	-0.229172	0.30212		0.219701	-0.366104	-0.213337	-0.386356
AAEL000294	conserved hypothetical protein	D					ENSANGP00000013769 [Anopheles gambiae str. PEST]	Serine/threonine dehydratase, pyridoxal-phosphate-binding site;Annexin				-0.568462	-0.403373	-0.883787	-0.564375	-0.507376	-0.733737	-1.30347	-0.534751	-1.08751	-0.478771	-1.07325	0.159732	-0.69971	-1.16293	-1.43995	-1.14408
AAEL000295	hypothetical protein	U					CG3363-PA [Drosophila melanogaster]					-0.229134	-0.767677	-0.257757	-0.820122	-0.303499	-0.523449		-0.31499	0.349716	0.0489786	0.215016		0.440228		0.238695
AAEL000296	conserved hypothetical protein	U					ENSANGP00000029120 [Anopheles gambiae str. PEST]
AAEL000297	mitochondrial ribosomal protein S25	REDOX/STRESS/MIT				GO:0003676,GO:0005198,GO:0005739,GO:0005840,GO:0006412	ENSANGP00000014061 [Anopheles gambiae str. PEST]	Mitochondrial ribosome	nucleic acid binding;structural molecule activity;mitochondrion;ribosome;protein biosynthesis			-0.387626	0.584455	0.720548	0.0463206	0.345583	0.304195	0.0582071	0.0782436		0.191618	0.381635	1.07614	0.219093	0.227262	0.0712283	0.181133
AAEL000298	sodium/shloride dependent amino acid transporter	TRP				GO:0005215,GO:0005326,GO:0005488,GO:0005623,GO:0005886,GO:0006810	ENSANGP00000013630 [Anopheles gambiae str. PEST]	Sodium:neurotransmitter symporter	transporter activity;neurotransmitter transporter activity;binding;cell;plasma membrane;transport
AAEL000299	hypothetical protein	D				GO:0003676,GO:0005634,GO:0008270	PREDICTED: similar to Zinc finger protein Kr18 (HKr18) [Bos taurus]	Zinc finger, C2H2-type;Zinc finger, C2H2-subtype	nucleic acid binding;nucleus;zinc ion binding											-0.293188	0.0951004	-0.506119	-0.734708	-0.124902		-0.63196	-1.05177
AAEL000300	wdpeat protein	D				GO:0007049,GO:0007582	ENSANGP00000016784 [Anopheles gambiae str. PEST]	WD-40 repeat;Periodic tryptophan protein-associated region	cell cycle;physiological process				0.390919	0.308495		0.267506	0.275178	0.189274	0.501645	0.126888	0.39995	0.164227		0.293315	0.109009
AAEL000301	heat shock protein	REDOX/STRESS/MIT				GO:0000166,GO:0005515,GO:0006950,GO:0009607,GO:0019538	ENSANGP00000016646 [Anopheles gambiae str. PEST]	Heat shock protein Hsp90;ATP-binding region, ATPase-like	nucleotide binding;protein binding;response to stress;response to biotic stimulus;protein metabolism			-0.265909	0.267092	0.724624		0.237529			0.355297		0.376188	-0.140832	0.265909	-0.191534	-0.106019	-0.195192	0.831275
AAEL000302	cysteinech venom protein, putative	D					ENSANGP00000011472 [Anopheles gambiae str. PEST]	EGF-like region;Protease inhibitor I8, cysteinech trypsin inhibitor-like
AAEL000303	Histone H2A, putative	RTT				GO:0003677	CG31618-PA [Drosophila melanogaster]	Histone H2A;Histone core;Transcription factor CBF/NF-Y/archaeal histone;Histone-fold/TFIID-TAF/NF-Y	DNA binding											-0.0966706	-0.571265	-1.32427		-0.310227	-0.69471	-0.593696	-1.01082
AAEL000304	conserved hypothetical protein	U												-0.565115	-1.00213	-0.457008	-0.515729	-0.196081	-0.597796	-0.438456	-0.09341	-0.341407	-0.70405	-0.284098	-0.726825	-0.295312	-0.498548
AAEL000305	conserved hypothetical protein	D				GO:0003676,GO:0005634,GO:0008270	PREDICTED: similar to Zinc finger protein 197 (ZnF20) isoform 19 [Canis familiaris]	Zinc finger, C2H2-type;Immunoglobulin/major histocompatibility complex;Zinc finger, C2H2-subtype	nucleic acid binding;nucleus;zinc ion binding
AAEL000306	conserved hypothetical protein	U					ENSANGP00000028979 [Anopheles gambiae str. PEST]
AAEL000307	dynein heavy chain	CS				GO:0000166,GO:0003774,GO:0005198,GO:0005856,GO:0006810,GO:0007010,GO:0007582,GO:0008233,GO:0016787,GO:0019538,GO:0043234	ENSANGP00000020894 [Anopheles gambiae str. PEST]	ATPase associated with various cellular activities, AAA-5;Dynein heavy chain	nucleotide binding;motor activity;structural molecule activity;cytoskeleton;transport;cytoskeleton organization and biogenesis;physiological process;peptidase activity;hydrolase activity;protein metabolism;protein complex
AAEL000308	conserved hypothetical protein	D				GO:0007155,GO:0016021,GO:0042246	ENSANGP00000010584 [Anopheles gambiae str. PEST]	Ninjurin	cell adhesion;integral to membrane;tissue regeneration			0.109543	-0.245994	-1.10298	0.158663	-0.378921		-0.392213	-1.46789			0.0914136	-0.109543	0.0901508			1.09777
AAEL000309	hypothetical protein	U					domeless CG14226-PA [Drosophila melanogaster]															-0.428609			-0.175086		-0.236605
AAEL000310	hypothetical protein	U					ENSANGP00000025401 [Anopheles gambiae str. PEST]					-2.3118	-1.61932	-1.73594	-2.95351	-2.03588	-3.05849	-2.12644	-2.17037	-1.00637	-0.876548	-0.324295		-0.597576	-0.421284	-0.524867	-0.378982
AAEL000311	conserved hypothetical protein	D				GO:0005549,GO:0006810	ENSANGP00000012392 [Anopheles gambiae str. PEST]		odorant binding;transport											-0.148105	0.275996	0.27083	-0.445174		-0.691821	-0.109424	1.61609
AAEL000312	hypothetical protein	U					CG17350-PA [Drosophila melanogaster]
AAEL000313	conserved hypothetical protein	U
AAEL000314	malate dehydrogenase	M				GO:0003824,GO:0005975,GO:0006091,GO:0009056	ENSANGP00000025275 [Anopheles gambiae str. PEST]	Malate/L-lactate dehydrogenase	catalytic activity;carbohydrate metabolism;generation of precursor metabolites and energy;catabolism
AAEL000315	pigeon protein (linotte protein)	D				GO:0007610,GO:0009628	ENSANGP00000013132 [Anopheles gambiae str. PEST]	RecA bacterial DNA recombination protein	behavior;response to abiotic stimulus			0.0689633	-0.89812	-0.466765	-0.0694268	-0.213962	-0.394747	-0.425404	0.112616	-0.345034	-0.651994	-0.363182	-0.0689633	0.121029	-0.291903		0.104964
AAEL000316	hypothetical protein	U					ENSANGP00000012394 [Anopheles gambiae str. PEST]
AAEL000317	cysteinech venom protein, putative	D					ENSANGP00000011472 [Anopheles gambiae str. PEST]	EGF-like region;Protease inhibitor I8, cysteinech trypsin inhibitor-like
AAEL000318	conserved hypothetical protein	CSR				GO:0005549,GO:0006810	odorant-binding protein AgamOBP36 [Anopheles gambiae]	Pheromone/general odorant binding protein, PBP/GOBP	odorant binding;transport
AAEL000319	hypothetical protein	CSR					odorant-binding protein AgamOBP36 [Anopheles gambiae]	Pheromone/general odorant binding protein, PBP/GOBP
AAEL000320	cytochrome P450	REDOX/STRESS/MIT				GO:0004497,GO:0005506,GO:0006118,GO:0020037	ENSANGP00000006290 [Anopheles gambiae str. PEST]	Cytochrome P450;E-class P450, group I;E-class P450, group IV;B-class P450	;iron ion binding;electron transport;
AAEL000321	acetyl-coa synthetase	M				GO:0003824,GO:0005737,GO:0006629,GO:0008152	ENSANGP00000011498 [Anopheles gambiae str. PEST]	AMP-dependent synthetase and ligase	catalytic activity;cytoplasm;lipid metabolism;metabolism
AAEL000322	hypothetical protein	U					GA11461-PA [Drosophila pseudoobscura]													0.419674	-0.875239			0.307588	0.217634		-0.704748
AAEL000323	cysteinech venom protein, putative	D
AAEL000324	tyrosine-protein kinase drl	D				GO:0000166,GO:0004672,GO:0004871,GO:0004872,GO:0006464,GO:0007165,GO:0007267,GO:0007275		Tyrosine protein kinase, active site;Tyrosine protein kinase;WIF;Protein kinase	nucleotide binding;protein kinase activity;signal transducer activity;receptor activity;protein modification;signal transduction;cell-cell signaling;development
AAEL000325	cytochrome P450	REDOX/STRESS/MIT				GO:0003824,GO:0005489,GO:0005623,GO:0006118,GO:0006629,GO:0006810,GO:0009058	ENSANGP00000006290 [Anopheles gambiae str. PEST]	Cytochrome P450;E-class P450, group I;E-class P450, group IV;B-class P450	catalytic activity;electron transporter activity;cell;electron transport;lipid metabolism;transport;biosynthesis
AAEL000326	cytochrome P450	REDOX/STRESS/MIT				GO:0004497,GO:0005506,GO:0006118,GO:0020037	ENSANGP00000006290 [Anopheles gambiae str. PEST]	Cytochrome P450;E-class P450, group I;E-class P450, group IV;B-class P450	;iron ion binding;electron transport;
AAEL000327	ecdysone-induced protein 78c (dr-78)	D				GO:0003677,GO:0003700,GO:0004872,GO:0005634,GO:0006350,GO:0007165,GO:0007275,GO:0030528,GO:0050789	ENSANGP00000026889 [Anopheles gambiae str. PEST]	Nuclear hormone receptor, DNA-binding;Steroid hormone receptor;Vitamin D receptor;Thyroid hormone receptor;Retinoic acid receptor;Nuclear hormone receptor, ligand-binding	DNA binding;transcription factor activity;receptor activity;nucleus;transcription;signal transduction;development;transcription regulator activity;regulation of biological process
AAEL000328	conserved hypothetical protein	D				GO:0003824,GO:0005488	ENSANGP00000024947 [Anopheles gambiae str. PEST]	Alcohol dehydrogenase GroES-like	catalytic activity;binding			0.272569		0.302845	0.139676	0.27574	0.464984	0.431991	0.474522	-0.292426		0.21312	0.383019	0.251421	0.373525	0.169272	0.0895572
AAEL000329	conserved hypothetical protein	D				GO:0007155,GO:0016021,GO:0042246	ENSANGP00000028979 [Anopheles gambiae str. PEST]	Ninjurin	cell adhesion;integral to membrane;tissue regeneration				0.0386264			-0.259888			-0.340212
AAEL000330	conserved hypothetical protein	U					ENSANGP00000002571 [Anopheles gambiae str. PEST]	Protein of unknown function DUF343					0.301038		0.0254729	0.0188988	0.0934197		0.149878	-0.195845	-0.27173		-0.273639	-0.198331	-0.282253	-0.273409
AAEL000331	elongation factor ts	RTT				GO:0005739,GO:0006412,GO:0008135	ENSANGP00000010562 [Anopheles gambiae str. PEST]	Elongation factor Ts;Ubiquitin-associated	mitochondrion;protein biosynthesis;translation factor activity\, nucleic acid binding			-0.653333	0.741841	-0.0667377	0.516879	-0.200301	0.176185	0.212838	-1.57523	-0.395753	0.659105	-0.616098		-0.450442	-0.144243		-0.462222
AAEL000332	conserved hypothetical protein	PROT				GO:0005488,GO:0005515,GO:0008233,GO:0019538	ENSANGP00000021064 [Anopheles gambiae str. PEST]	Peptidase M, neutral zinc metallopeptidases, zinc-binding site	binding;protein binding;peptidase activity;protein metabolism
AAEL000333	cysteinech venom protein, putative	D					ENSANGP00000011472 [Anopheles gambiae str. PEST]	EGF-like region;Protease inhibitor I8, cysteinech trypsin inhibitor-like
AAEL000334	villin	CS				GO:0000003,GO:0003779,GO:0005198,GO:0005509,GO:0006810,GO:0007010,GO:0016043	ENSANGP00000010518 [Anopheles gambiae str. PEST]	Gelsolin;Gelsolin region;Villin headpiece	reproduction;actin binding;structural molecule activity;calcium ion binding;transport;cytoskeleton organization and biogenesis;cell organization and biogenesis
AAEL000335	lamin	CS				GO:0005198,GO:0005635,GO:0005856,GO:0006996,GO:0007010,GO:0007049	ENSANGP00000012319 [Anopheles gambiae str. PEST]	Intermediate filament protein;Intermediate filament, C-terminal	structural molecule activity;nuclear envelope;cytoskeleton;organelle organization and biogenesis;cytoskeleton organization and biogenesis;cell cycle											0.585645		-0.680989			-0.851186		-1.05238
AAEL000336	conserved hypothetical protein	D					ENSANGP00000006292 [Anopheles gambiae str. PEST]	Antifreeze protein, type I
AAEL000337	hypothetical protein	D				GO:0003676,GO:0005634,GO:0008270	GA15849-PA [Drosophila pseudoobscura]	Endoplasmic reticulum targeting sequence;Zinc finger, C2H2-type;Peptidase M, neutral zinc metallopeptidases, zinc-binding site;Zinc finger, C2H2-subtype;SH2 motif;Zinc finger, AD-type	nucleic acid binding;nucleus;zinc ion binding											-0.131299		-0.302314		-0.193635	-0.215488	-0.155405	-0.753675
AAEL000338	cytochrome P450	REDOX/STRESS/MIT				GO:0004497,GO:0005506,GO:0006118,GO:0020037	ENSANGP00000013571 [Anopheles gambiae str. PEST]	Cytochrome P450;E-class P450, group I;E-class P450, group IV	;iron ion binding;electron transport;
AAEL000339	paxillin, putative	CS				GO:0005198,GO:0005488,GO:0005886,GO:0007010,GO:0007582	SD04793p [Drosophila melanogaster]	LIM, zinc-binding	structural molecule activity;binding;plasma membrane;cytoskeleton organization and biogenesis;physiological process					0.115565			-0.472021	0.216003	-0.716624	-0.293988		0.18668		0.24314	-0.283243	0.261567	-0.494599
AAEL000340	cytochrome P450	REDOX/STRESS/MIT				GO:0003824,GO:0005489,GO:0005623,GO:0006118,GO:0006629,GO:0006810,GO:0009058	ENSANGP00000019398 [Anopheles gambiae str. PEST]	Cytochrome P450;E-class P450, group I;E-class P450, group IV;B-class P450	catalytic activity;electron transporter activity;cell;electron transport;lipid metabolism;transport;biosynthesis
AAEL000341	basic helix-loop-helix protein	D				GO:0003700,GO:0005634,GO:0006350,GO:0007267,GO:0007275,GO:0007582,GO:0050789	ENSANGP00000010530 [Anopheles gambiae str. PEST]	Basic helix-loop-helix dimerisation region bHLH	transcription factor activity;nucleus;transcription;cell-cell signaling;development;physiological process;regulation of biological process
AAEL000342	peroxidasin	I				GO:0003824,GO:0005578,GO:0008152,GO:0009607,GO:0016209			catalytic activity;extracellular matrix (sensu Metazoa);metabolism;response to biotic stimulus;antioxidant activity
AAEL000343	serine/threonine-protein kinase vrk	D				GO:0004672,GO:0005524,GO:0006468			protein kinase activity
AAEL000344	conserved hypothetical protein	D				GO:0005549,GO:0006810	ENSANGP00000025471 [Anopheles gambiae str. PEST]	Pheromone/general odorant binding protein, PBP/GOBP	odorant binding;transport
AAEL000345	membrane associated guanylate kinase inverted 1, magi1	TRP				GO:0005102,GO:0005515,GO:0005623,GO:0007165,GO:0007582,GO:0015031,GO:0016043,GO:0016301	ENSANGP00000026281 [Anopheles gambiae str. PEST]	Cytochrome b5;WW/Rsp5/WWP;WW;PDZ/DHR/GLGF;Prolinech region	receptor binding;protein binding;cell;signal transduction;physiological process;protein transport;cell organization and biogenesis;kinase activity
AAEL000346	spastin	CS				GO:0000166,GO:0005783,GO:0005815,GO:0005856,GO:0007010,GO:0008092,GO:0015031,GO:0016043,GO:0016787,GO:0043234	ENSANGP00000015366 [Anopheles gambiae str. PEST]	AAA-protein subdomain;AAA ATPase, central region;ATPase associated with various cellular activities, AAA-5	nucleotide binding;endoplasmic reticulum;microtubule organizing center;cytoskeleton;cytoskeleton organization and biogenesis;cytoskeletal protein binding;protein transport;cell organization and biogenesis;hydrolase activity;protein complex											0.38558	0.647981			0.062434	0.211981	0.322607	0.251897
AAEL000347	hypothetical protein	U					ENSANGP00000013571 [Anopheles gambiae str. PEST]
AAEL000348	conserved hypothetical protein	U																				0.488601			0.293369		0.341363
AAEL000349	conserved hypothetical protein	U						Leucinech repeat;Follicle-stimulating hormone receptor;Cysteinech flanking region, C-terminal;Immunoglobulin I-set;Immunoglobulin V-set;Immunoglobulin;Leucinech repeat, typical subtype;Immunoglobulin-like
AAEL000350	conserved hypothetical protein	CSR					odorant-binding protein AgamOBP36 [Anopheles gambiae]	Pheromone/general odorant binding protein, PBP/GOBP
AAEL000351	conserved hypothetical protein	U					Hypothetical protein CBG22480 [Caenorhabditis briggsae]
AAEL000352	hypothetical protein	U
AAEL000353	hypothetical protein	D					putative salivary secreted peptide with TIL domain [Anopheles gambiae]	EGF-like region;Protease inhibitor I8, cysteinech trypsin inhibitor-like
AAEL000354	dimeric dihydrodiol dehydrogenase	M				GO:0003824,GO:0006118,GO:0008152	ENSANGP00000010550 [Anopheles gambiae str. PEST]	Oxidoreductase, N-terminal;Oxidoreductase, C-terminal	catalytic activity;electron transport;metabolism											-0.455238	-0.388469					-0.300882
AAEL000356	cysteinech venom protein, putative	D					ENSANGP00000025673 [Anopheles gambiae str. PEST]	EGF-like region;Protease inhibitor I8, cysteinech trypsin inhibitor-like
AAEL000357	cytochrome P450	REDOX/STRESS/MIT				GO:0004497,GO:0005506,GO:0006118,GO:0020037	ENSANGP00000006290 [Anopheles gambiae str. PEST]	Cytochrome P450;E-class P450, group I;E-class P450, group IV;B-class P450	;iron ion binding;electron transport;
AAEL000358	hypothetical protein	CSR						Pheromone/general odorant binding protein, PBP/GOBP
AAEL000359	ferritin-precursor, putative	D				GO:0006879,GO:0008199	putative ferritin [Oncometopia nigricans]		iron ion homeostasis;ferric iron binding
AAEL000360	dnaJ subfamily B member, putative	RTT				GO:0005515,GO:0005737,GO:0006950,GO:0009607,GO:0009628,GO:0019538	PREDICTED: similar to testis spermatogenesis apoptosislated protein 6, partial [Apis mellifera]	Heat shock protein DnaJ, N-terminal;Heat shock protein DnaJ;Chaperone DnaJ, C-terminal	protein binding;cytoplasm;response to stress;response to biotic stimulus;response to abiotic stimulus;protein metabolism
AAEL000361	cysteinech venom protein, putative	D					ENSANGP00000011472 [Anopheles gambiae str. PEST]	EGF-like region;Protease inhibitor I8, cysteinech trypsin inhibitor-like
AAEL000362	conserved hypothetical protein	D					ENSANGP00000011440 [Anopheles gambiae str. PEST]	Ubiquitin system component Cue				-0.603195		0.84047	-0.271868	0.899359		0.421936	0.60097				0.603195
AAEL000363	cysteinech venom protein, putative	D					ENSANGP00000011472 [Anopheles gambiae str. PEST]	EGF-like region;Protease inhibitor I8, cysteinech trypsin inhibitor-like
AAEL000364	glycine cleavage system h protein	M				GO:0005737,GO:0005739,GO:0006519,GO:0009056,GO:0016787,GO:0043234	ENSANGP00000024265 [Anopheles gambiae str. PEST]	2-oxo acid dehydrogenase, lipoyl-binding site;Glycine cleavage H-protein	cytoplasm;mitochondrion;amino acid and derivative metabolism;catabolism;hydrolase activity;protein complex			-0.22767	0.00573786	0.151943	-0.287047	-0.183344		-0.274489	0.33809	-0.542719	-0.437003	-0.649475	0.265418	-0.764813	0.012561	-0.568595	-0.585574
AAEL000365	hypothetical protein	U					CG4272-PB, isoform B [Drosophila melanogaster]													0.109626		0.202317				0.190771	-0.254275
AAEL000366	hypothetical protein	U					hypothetical protein Afu5g12110 [Aspergillus fumigatus Af293]
AAEL000367	conserved hypothetical protein	D					ENSANGP00000015366 [Anopheles gambiae str. PEST]	AAA-protein subdomain;AAA ATPase, central region;ATPase associated with various cellular activities, AAA-5
AAEL000368	conserved hypothetical protein	U					ENSANGP00000010520 [Anopheles gambiae str. PEST]
AAEL000369	cysteinech venom protein, putative	D					ENSANGP00000011472 [Anopheles gambiae str. PEST]	EGF-like region;Protease inhibitor I8, cysteinech trypsin inhibitor-like
AAEL000370	acyl-CoA oxidase	M				GO:0003824,GO:0005777,GO:0006118,GO:0006629	ENSANGP00000011863 [Anopheles gambiae str. PEST]	Acyl-CoA dehydrogenase, central region;Acyl-CoA dehydrogenase, type 1;Acyl-CoA oxidase, C-terminal	catalytic activity;peroxisome;electron transport;lipid metabolism							0.431939	0.939911	0.430416	0.342278	0.581281		0.198534			0.481271	0.915492	-0.324253
AAEL000371	hypothetical protein	D				GO:0005198,GO:0005215,GO:0005578,GO:0005737,GO:0005886,GO:0006810,GO:0007165,GO:0007267,GO:0007582,GO:0008092,GO:0043234	ENSANGP00000008996 [Anopheles gambiae str. PEST]	PDZ/DHR/GLGF	structural molecule activity;transporter activity;extracellular matrix (sensu Metazoa);cytoplasm;plasma membrane;transport;signal transduction;cell-cell signaling;physiological process;cytoskeletal protein binding;protein complex
AAEL000372	myo inositol monophosphatase	D				GO:0006629,GO:0007165,GO:0008152,GO:0016787	ENSANGP00000011437 [Anopheles gambiae str. PEST]	Inositol monophosphatase;Inositol phosphatase/fructose-1,6-bisphosphatase	lipid metabolism;signal transduction;metabolism;hydrolase activity			-0.288016	-0.416196	-0.195776	-0.359298	-0.222718	-0.387437	-0.289237		-0.318747	-0.760881	-0.485074	0.288016		-0.309649		0.608281
AAEL000373	conserved hypothetical protein	D					ENSANGP00000028979 [Anopheles gambiae str. PEST]	Ninjurin
AAEL000374	cysteinech venom protein, putative	D					cysteinech venom-like protein [Aedes albopictus]	EGF-like region;Protease inhibitor I8, cysteinech trypsin inhibitor-like
AAEL000375	cysteinech venom protein, putative	D					ENSANGP00000011472 [Anopheles gambiae str. PEST]	EGF-like region;Protease inhibitor I8, cysteinech trypsin inhibitor-like
AAEL000376	peroxidasin	I	HPX4	PRDX	HPX	GO:0003824,GO:0005578,GO:0008152,GO:0009607,GO:0016209		von Willebrand factor, type C;Animal haem peroxidase	catalytic activity;extracellular matrix (sensu Metazoa);metabolism;response to biotic stimulus;antioxidant activity	Aaeg:N35122
AAEL000377	conserved hypothetical protein	CSR				GO:0005549,GO:0006810	odorant-binding protein AgamOBP36 [Anopheles gambiae]	Pheromone/general odorant binding protein, PBP/GOBP	odorant binding;transport
AAEL000378	integrin-linked protein kinase 2 (ilk-2)	CS				GO:0000166,GO:0004672,GO:0004871,GO:0005886,GO:0006464,GO:0007010,GO:0007165,GO:0007275,GO:0009653	ENSANGP00000011464 [Anopheles gambiae str. PEST]	Ankyrin;Tyrosine protein kinase;Protein kinase	nucleotide binding;protein kinase activity;signal transducer activity;plasma membrane;protein modification;cytoskeleton organization and biogenesis;signal transduction;development;morphogenesis			0.162525	-0.283609	-0.684355		-0.389471			0.290968		-0.184619	-0.601011	-0.162525			-0.637173	0.414409
AAEL000379	cysteinech venom protein, putative	D					ENSANGP00000011472 [Anopheles gambiae str. PEST]	EGF-like region;Protease inhibitor I8, cysteinech trypsin inhibitor-like
AAEL000380	conserved hypothetical protein	U					ENSANGP00000027751 [Anopheles gambiae str. PEST]					0.199596	0.244013	0.336302	0.171724	0.242194	0.0969167	0.161457	0.290638	-0.338395	0.277933	-0.181473	-0.218055	-0.121375	-0.307624	0.0321471	-0.296475
AAEL000381	syntrophin	D				GO:0005198,GO:0005215,GO:0005578,GO:0005737,GO:0005886,GO:0006810,GO:0007165,GO:0007267,GO:0007582,GO:0008092,GO:0043234	ENSANGP00000008996 [Anopheles gambiae str. PEST]		structural molecule activity;transporter activity;extracellular matrix (sensu Metazoa);cytoplasm;plasma membrane;transport;signal transduction;cell-cell signaling;physiological process;cytoskeletal protein binding;protein complex
AAEL000382	myosin motor, putative	CS					ENSANGP00000010585 [Anopheles gambiae str. PEST]
AAEL000383	beta-1,3-galactosyltransferase brn	D				GO:0000003,GO:0005576,GO:0005623,GO:0006412,GO:0006464,GO:0006629,GO:0007165,GO:0007582,GO:0009058,GO:0009653,GO:0016740	ENSANGP00000007774 [Anopheles gambiae str. PEST]	Glycosyl transferase, family 31	reproduction;extracellular region;cell;protein biosynthesis;protein modification;lipid metabolism;signal transduction;physiological process;biosynthesis;morphogenesis;transferase activity
AAEL000384	vesicular acetylcholine transporter	TRP				GO:0005215,GO:0005623,GO:0006810,GO:0007267,GO:0007582	GA10193-PA [Drosophila pseudoobscura]	Cl- channel, voltage gated;Major facilitator superfamily MFS_1;Major facilitator superfamily	transporter activity;cell;transport;cell-cell signaling;physiological process
AAEL000385	developmentally regulated RNA-binding protein	D				GO:0003676,GO:0004497,GO:0005506,GO:0006118,GO:0020037			nucleic acid binding
AAEL000386	phopsphatidylinositol 3-kinase, putative	D				GO:0005829,GO:0006629,GO:0006810,GO:0007165,GO:0008289,GO:0009607,GO:0015031,GO:0016043,GO:0016301,GO:0043234	phosphoinositide 3-kinase [Drosophila melanogaster]	Phosphatidylinositol 3- and 4-kinase, catalytic;Phosphoinositide 3-kinase, ras-binding;Phosphoinositide 3-kinase, C2;Phosphoinositide 3-kinase accessory region PIK;Phox-like;C2	cytosol;lipid metabolism;transport;signal transduction;lipid binding;response to biotic stimulus;protein transport;cell organization and biogenesis;kinase activity;protein complex				0.261873	0.336128	-0.468765			1.26088	0.382211			-0.604943		-0.09826		0.636677
AAEL000387	hypothetical protein	D					leucine rich protein [Aedes albopictus]	Leucinech repeat
AAEL000388	isoleucyl tRNA synthetase	M				GO:0000166,GO:0003723,GO:0003824,GO:0006139,GO:0006412,GO:0006519	ENSANGP00000017588 [Anopheles gambiae str. PEST]	Aminoacyl-tRNA synthetase, class I;Isoleucyl-tRNA synthetase, class Ia;Valyl-tRNA synthetase, class Ia;Aminoacyl-tRNA synthetase, class Ia;tRNA synthetase, valyl/leucyl, anticodon-binding	nucleotide binding;RNA binding;catalytic activity;nucleobase\, nucleoside\, nucleotide and nucleic acid metabolism;protein biosynthesis;amino acid and derivative metabolism			0.129939		0.144439	-0.288388	-0.253937	0.0843586	-0.401146	0.520998	0.288274	0.102859		-0.199642	0.192117	0.358221	-0.446487	0.207889
AAEL000389	brain chitinase and chia	M				GO:0005576,GO:0005975,GO:0016787,GO:0030246	PREDICTED: similar to chitinase [Apis mellifera]	Glycoside hydrolase, chitinase active site;Glycoside hydrolase, family 18	extracellular region;carbohydrate metabolism;hydrolase activity;carbohydrate binding
AAEL000390	hypothetical protein	D				GO:0005634,GO:0008270	ENSANGP00000016597 [Anopheles gambiae str. PEST]		nucleus;zinc ion binding
AAEL000391	Odorant receptor 85d, putative	CSR				GO:0004984,GO:0005549,GO:0007608,GO:0016020	ENSANGP00000007927 [Anopheles gambiae str. PEST]	Olfactory receptor, Drosophila	olfactory receptor activity;odorant binding;sensory perception of smell;membrane
AAEL000392	alpha-amylase	DIG				GO:0005975,GO:0016787			carbohydrate metabolism											-0.841761	-0.457388			-0.338579	-0.44309	-1.08037	-0.199511
AAEL000393	suppressors of cytokine signalling	I				GO:0007165,GO:0007242,GO:0050789	SD04308p [Drosophila melanogaster]	SH2 motif	signal transduction;intracellular signaling cascade;regulation of biological process											0.215972	0.234233	-0.100947		0.249668	0.474212	0.521522	-0.250507
AAEL000394	U2 small nuclear ribonucleoprotein, putative	RTT				GO:0003723,GO:0005488,GO:0005634,GO:0006139,GO:0043234	ENSANGP00000003103 [Anopheles gambiae str. PEST]	Prolinech region;Zinc finger, C2H2-type matrin	RNA binding;binding;nucleus;nucleobase\, nucleoside\, nucleotide and nucleic acid metabolism;protein complex
AAEL000395	retinoid x receptor (rxr)	D				GO:0000003,GO:0003677,GO:0003700,GO:0004872,GO:0005488,GO:0005515,GO:0005634,GO:0005654,GO:0005694,GO:0006350,GO:0006629,GO:0007165,GO:0007275,GO:0007582,GO:0008219,GO:0009628,GO:0009653,GO:0009719,GO:0016043,GO:0030154,GO:0043234,GO:0050789		Nuclear hormone receptor, DNA-binding;Retinoid X receptor;Steroid hormone receptor;Vitamin D receptor;Thyroid hormone receptor;Nuclear hormone receptor, ligand-binding	reproduction;DNA binding;transcription factor activity;receptor activity;binding;protein binding;nucleus;nucleoplasm;chromosome;transcription;lipid metabolism;signal transduction;development;physiological process;cell death;response to abiotic stimulus;mo			0.179223	0.335664	0.207812	0.227243	0.12804	0.514092	0.114085	0.258972	0.150218	0.19117		-0.179223	0.27129	0.26549	0.261576	-0.101238
AAEL000396	hypothetical protein	U					hypothetical protein 71.t00026 [Entamoeba histolytica HM-1:IMSS]
AAEL000397	conserved hypothetical protein	U					PREDICTED: similar to CG17689-PA, partial [Apis mellifera]													0.874873	0.218452	0.48716		0.202948	0.136719	0.826175	-0.065124
AAEL000398	sidestep protein	D				GO:0005886,GO:0007165	ENSANGP00000017597 [Anopheles gambiae str. PEST]	Vascular endothelial growth factor receptor, VEGFR;Immunoglobulin V-set;Immunoglobulin;CD80-like C2-set immunoglobulin;Fibronectin, type III;Immunoglobulin-like	plasma membrane;signal transduction
AAEL000399	conserved hypothetical protein	D					ENSANGP00000017594 [Anopheles gambiae str. PEST]	Amino acid transporter, transmembrane;Amino acid/polyamine transporter II																			-0.420256
AAEL000400	hypothetical protein	D					pleckstrin homology domain containing, family A member 6 [Homo sapiens]														0.323657			0.308287	0.605265	0.325522	-0.315328
AAEL000401	conserved hypothetical protein	U					ENSANGP00000017630 [Anopheles gambiae str. PEST]
AAEL000402	conserved hypothetical protein	D				GO:0003677,GO:0003700,GO:0005515,GO:0005634,GO:0006350,GO:0007275,GO:0009058,GO:0030528,GO:0050789	ENSANGP00000003100 [Anopheles gambiae str. PEST]	Basic-leucine zipper (bZIP) transcription factor;TonB box, N-terminal;cAMP response element binding (CREB) protein;Transcription factor Jun;bZIP transcription factor, bZIP_1;Basic leucine zipper;Bipartite nuclear localization signal;Caspase Recruitment	DNA binding;transcription factor activity;protein binding;nucleus;transcription;development;biosynthesis;transcription regulator activity;regulation of biological process
AAEL000403	conserved hypothetical protein	U					ENSANGP00000017706 [Anopheles gambiae str. PEST]	HEAT
AAEL000404	DNA repair helicase rad3/xp-d	RTT				GO:0000166,GO:0003676,GO:0003677,GO:0003824,GO:0005634,GO:0005654,GO:0005694,GO:0005737,GO:0006259,GO:0006350,GO:0006950,GO:0007049,GO:0007582,GO:0009719,GO:0016787,GO:0030528,GO:0043234,GO:0050789	ENSANGP00000018237 [Anopheles gambiae str. PEST]	Xeroderma pigmentosum group D protein;DEAD_2;Protein of unknown function DUF1227	nucleotide binding;nucleic acid binding;DNA binding;catalytic activity;nucleus;nucleoplasm;chromosome;cytoplasm;DNA metabolism;transcription;response to stress;cell cycle;physiological process;response to endogenous stimulus;hydrolase activity;transcripti				0.349987	0.200293		0.280783	0.381696		0.557937	0.202939	0.290497	-0.198555		0.149657	0.0756031	0.107853	0.11938
AAEL000405	odd Oz protein	D				GO:0005198,GO:0005576,GO:0005578,GO:0005886	ENSANGP00000003104 [Anopheles gambiae str. PEST]	EGF-like region;EGF-like, laminin;EGF-like;EGF, extracellular;NHL repeat;YD repeat;EGF-like, type 3	structural molecule activity;extracellular region;extracellular matrix (sensu Metazoa);plasma membrane										-0.394665
AAEL000406	conserved hypothetical protein	U					ENSANGP00000019787 [Anopheles gambiae str. PEST]						-0.598177	-0.303746	-0.0961372				-0.611456
AAEL000407	conserved hypothetical protein	U					CG14199-PA [Drosophila melanogaster]	Protein of unknown function DUF1242
AAEL000408	conserved hypothetical protein	U					ENSANGP00000024123 [Anopheles gambiae str. PEST]
AAEL000409	conserved hypothetical protein	U					ENSANGP00000027340 [Anopheles gambiae str. PEST]
AAEL000410	glycoprotein 25l	D				GO:0005215,GO:0005515,GO:0005623,GO:0005794,GO:0015031,GO:0016043	ENSANGP00000026678 [Anopheles gambiae str. PEST]	emp24/gp25L/p24;GOLD	transporter activity;protein binding;cell;Golgi apparatus;protein transport;cell organization and biogenesis			0.441669	0.436992	0.359101	0.211304	0.507268	0.429184	0.341759	0.438035	-0.0860404	-0.164612	-0.281011	-0.159928			-0.179209	-0.117494
AAEL000411	conserved hypothetical protein	U					ENSANGP00000011024 [Anopheles gambiae str. PEST]	Protein of unknown function DUF159												-0.209427	0.0861707	-0.60779	-0.175217	0.249203		-0.0868398	-0.468025
AAEL000412	conserved hypothetical protein	U					ENSANGP00000017629 [Anopheles gambiae str. PEST]	Lipase, active site;Alpha/beta hydrolase;Esterase/lipase/thioesterase				0.385339	0.24476	0.441543	0.241108	0.283621	0.190321	0.234025	0.409087	-0.0955643		-0.249045		0.0811555	-0.102999	-0.166222
AAEL000413	conserved hypothetical protein	D					ENSANGP00000011981 [Anopheles gambiae str. PEST]	Solute-binding protein/glutamate receptor
AAEL000414	six/sine homebox transcription factors	D				GO:0000003,GO:0003700,GO:0005634,GO:0006350,GO:0007275,GO:0007582,GO:0009653,GO:0009790,GO:0030528,GO:0050789	ENSANGP00000026008 [Anopheles gambiae str. PEST]	Helix-turn-helix motif, lambda-like repressor;Homeobox;SIX;SIX/SINE homeobox	reproduction;transcription factor activity;nucleus;transcription;development;physiological process;morphogenesis;embryonic development;transcription regulator activity;regulation of biological process
AAEL000415	AMP dependent coa ligase	M				GO:0003824,GO:0006629	ENSANGP00000010831 [Anopheles gambiae str. PEST]	AMP-dependent synthetase and ligase	catalytic activity;lipid metabolism																	0.179266
AAEL000416	hypothetical protein	D				GO:0003676,GO:0003700,GO:0003824,GO:0004672,GO:0004872,GO:0005102,GO:0005488,GO:0005509,GO:0005578,GO:0005634,GO:0006118,GO:0006350,GO:0006464,GO:0007165,GO:0007275,GO:0008233,GO:0009056,GO:0009653,GO:0019538,GO:0030234,GO:0050789	unnamed protein product [Staphylococcus haemolyticus JCSC1435]		nucleic acid binding;transcription factor activity;catalytic activity;protein kinase activity;receptor activity;receptor binding;binding;calcium ion binding;extracellular matrix (sensu Metazoa);nucleus;electron transport;transcription;protein modification											0.631033				0.477818	0.142716	0.593869	-0.147771
AAEL000417	monocarboxylate transporter	TRP				GO:0005215,GO:0006811	ENSANGP00000014764 [Anopheles gambiae str. PEST]	Major facilitator superfamily MFS_1	transporter activity;ion transport
AAEL000418	conserved hypothetical protein	D				GO:0005554	ENSANGP00000002682 [Anopheles gambiae str. PEST]	HesB/YadR/YfhF	molecular function unknown			-0.0269599	0.204887	0.319021	0.200815	0.136328		0.28813	0.180223		-0.167454	0.168227	-0.0295581	0.0730367	-0.168739	0.287554
AAEL000419	conserved hypothetical protein	CS				GO:0042302	ENSANGP00000010792 [Anopheles gambiae str. PEST]	Insect cuticle protein	structural constituent of cuticle
AAEL000420	cathepsin o	I				GO:0006508,GO:0008234	PREDICTED: similar to Cathepsin O precursor [Apis mellifera]	Peptidase, cysteine peptidase active site;Peptidase C1A, papain C-terminal	proteolysis;cysteine-type peptidase activity											-0.540795	-0.607172	-0.940111		-0.249068	-0.170035	-0.388851	-0.401186
AAEL000421	protein farnesyltransferase alpha subunit/rab geranylgeranyl transferase alpha subunit	D				GO:0005941,GO:0006412,GO:0006464,GO:0016740	ENSANGP00000025497 [Anopheles gambiae str. PEST]	Protein prenyltransferase, alpha subunit	unlocalized protein complex;protein biosynthesis;protein modification;transferase activity
AAEL000422	U3 small nucleolar RNA-associated protein, putative	RTT				GO:0005794,GO:0006810,GO:0016023,GO:0016043	PREDICTED: similar to CG3071-PA [Apis mellifera]	WD-40 repeat	Golgi apparatus;transport;cytoplasmic membrane-bound vesicle;cell organization and biogenesis				0.32859							0.103904	0.149325	-0.314865			-0.264376	-0.243722	-0.456234
AAEL000423	conserved hypothetical protein	U					EG:133E12.4 [Drosophila melanogaster]
AAEL000424	leucine aminopeptidase	PROT				GO:0005622,GO:0008233,GO:0019538	ENSANGP00000005638 [Anopheles gambiae str. PEST]	Peptidase M17, leucyl aminopeptidase, C-terminal;Arginine deiminase;Peptidase M17, leucyl aminopeptidase, N-terminal	intracellular;peptidase activity;protein metabolism				-0.225379	-0.2014	-0.167197	-0.324393	-0.0779633	-0.215308	0.144452	-0.202709		-0.273579	-0.323714	-0.234464	-0.330878	-0.20347	-0.22312
AAEL000425	conserved hypothetical protein	D				GO:0003677,GO:0004518,GO:0005634,GO:0006259,GO:0006950,GO:0009056,GO:0009719	ENSANGP00000021102 [Anopheles gambiae str. PEST]	DNA repair protein (XPGC)/yeast Rad;Xeroderma pigmentosum group G protein;XPG N-terminal;XPG I;5'3'-Exonuclease N- and I-domain	DNA binding;nuclease activity;nucleus;DNA metabolism;response to stress;catabolism;response to endogenous stimulus
AAEL000426	hypothetical protein	U					ENSANGP00000014349 [Anopheles gambiae str. PEST]
AAEL000427	conserved hypothetical protein	D				GO:0008152,GO:0016740	ENSANGP00000027789 [Anopheles gambiae str. PEST]	Phospholipid/glycerol acyltransferase	metabolism;transferase activity			0.510889	0.169682	-0.262671	0.0591287		0.171809		0.217635	0.46797		-0.192313			0.0724888	0.192555
AAEL000428	tryptophan 2,3-dioxygenase	D				GO:0003824,GO:0006519,GO:0007275,GO:0009056,GO:0009058,GO:0019748		Tryptophan 2,3-dioxygenase	catalytic activity;amino acid and derivative metabolism;development;catabolism;biosynthesis;secondary metabolism			0.471348	0.108368	0.216531	0.216686	-0.366185	0.0506538	-0.108293	-0.145841	-0.345953	0.440669	-0.301512		0.480333	0.207185	-0.330284	-0.333081
AAEL000429	hypothetical protein	U					ENSANGP00000011086 [Anopheles gambiae str. PEST]													0.227987	0.329579			0.210899		-0.153327	-0.151095
AAEL000430	hypothetical protein	D				GO:0005634,GO:0007049,GO:0008233,GO:0019538	SD09011p [Drosophila melanogaster]		nucleus;cell cycle;peptidase activity;protein metabolism
AAEL000431	conserved hypothetical protein	U					GA20744-PA [Drosophila pseudoobscura]	SRR1				-0.154489	0.225086	0.247439	0.0728608	0.0910432	0.158175	0.152485	0.353748		0.0999039	-0.0255004	0.265603	0.0973776	0.124081	-0.103322	0.135688
AAEL000432	nucleosome assembly protein	M				GO:0005634,GO:0006334	ENSANGP00000010302 [Anopheles gambiae str. PEST]	Nucleosome assembly protein (NAP)	nucleus;nucleosome assembly
AAEL000433	glypican	D				GO:0005198,GO:0005515,GO:0005576,GO:0005578,GO:0007165,GO:0007275,GO:0009790,GO:0050789	ENSANGP00000010459 [Anopheles gambiae str. PEST]	Glypican	structural molecule activity;protein binding;extracellular region;extracellular matrix (sensu Metazoa);signal transduction;development;embryonic development;regulation of biological process
AAEL000434	lipid a export ATP-binding/permease protein msba	TRP				GO:0000166,GO:0005215,GO:0005623,GO:0005739,GO:0006810,GO:0009058,GO:0009607,GO:0009628,GO:0016043,GO:0016787,GO:0019748	ENSANGP00000002692 [Anopheles gambiae str. PEST]	ABC transporter related;ABC transporter, transmembrane region;ATP/GTP-binding site motif A (P-loop)	nucleotide binding;transporter activity;cell;mitochondrion;transport;biosynthesis;response to biotic stimulus;response to abiotic stimulus;cell organization and biogenesis;hydrolase activity;secondary metabolism
AAEL000435	THO complex, putative	TRP				GO:0006810,GO:0016043	ENSANGP00000017914 [Anopheles gambiae str. PEST]	Protein of unknown function DUF783	transport;cell organization and biogenesis
AAEL000436	conserved hypothetical protein	D					ENSANGP00000011034 [Anopheles gambiae str. PEST]	Nuclear protein SET				0.0347015	-0.0673574	-0.190503	-0.129764	-0.155703	-0.120923	-0.111665	0.0925744		0.189998	-0.303048	-0.332283	-0.236732	-0.438868	-0.133704	-0.491554
AAEL000437	conserved hypothetical protein	U					ENSANGP00000029712 [Anopheles gambiae str. PEST]
AAEL000438	epoxide hydrolase	M					ENSANGP00000010491 [Anopheles gambiae str. PEST]	Epoxide hydrolase;Alpha/beta hydrolase;Peptidase S33, prolyl aminopeptidase;Alpha/beta hydrolase fold-1;Esterase/lipase/thioesterase
AAEL000439	hypothetical protein	D				GO:0003676,GO:0005634,GO:0008270	ENSANGP00000009418 [Anopheles gambiae str. PEST]	Zinc finger, C2H2-type;Zinc finger, AD-type;HMG-I and HMG-Y, DNA-binding	nucleic acid binding;nucleus;zinc ion binding											-0.305608		-0.201105		0.222083
AAEL000440	DNA repair/transcription protein met18/mms19	RTT				GO:0003676,GO:0005515,GO:0006259,GO:0006350,GO:0006950,GO:0009719,GO:0030528,GO:0050789	ENSANGP00000010461 [Anopheles gambiae str. PEST]	Sugar transporter superfamily;HEAT	nucleic acid binding;protein binding;DNA metabolism;transcription;response to stress;response to endogenous stimulus;transcription regulator activity;regulation of biological process
AAEL000441	hypothetical protein	U					ENSANGP00000029196 [Anopheles gambiae str. PEST]					0.327386	0.55888		0.284019	0.826784			0.313356				-0.279487
AAEL000442	conserved hypothetical protein	D					oskar [Aedes aegypti]													0.902888	0.562855	0.44537		0.451769	0.194822	0.828048	-0.0346422
AAEL000443	conserved hypothetical protein	U
AAEL000444	UDP-glucose glycoprotein:glucosyltransferase	D				GO:0005635,GO:0005737,GO:0005783,GO:0006412,GO:0006464,GO:0016740	ENSANGP00000010474 [Anopheles gambiae str. PEST]	UDP-glucose:Glycoprotein Glucosyltransferase	nuclear envelope;cytoplasm;endoplasmic reticulum;protein biosynthesis;protein modification;transferase activity			0.117515	0.23265	0.0805528		0.123345	0.0683201	-0.0625603		-0.149818	-0.285385	-0.150773	-0.150226		-0.162339	-0.149131	-0.118116
AAEL000445	conserved hypothetical protein	U										0.330754	0.566422		0.240853		0.348001			-0.959555	-0.651446	0.334728	-0.624905	-0.660058	-0.640788	-1.22294	0.0777098
AAEL000446	tight junction protein	D				GO:0003824,GO:0005198,GO:0005515,GO:0005886,GO:0006118,GO:0007165,GO:0009653,GO:0009790,GO:0016043,GO:0016301,GO:0050789	ENSANGP00000024667 [Anopheles gambiae str. PEST]	Oxygen oxidoreductase covalent FAD-binding site;PDZ/DHR/GLGF;Variant SH3;Guanylate kinase	catalytic activity;structural molecule activity;protein binding;plasma membrane;electron transport;signal transduction;morphogenesis;embryonic development;cell organization and biogenesis;kinase activity;regulation of biological process
AAEL000447	V-1 protein, putative	D					PREDICTED: similar to ankyrin repeat domain 28 [Strongylocentrotus purpuratus]	Ankyrin;ZU5;Death
AAEL000448	conserved hypothetical protein	U
AAEL000449	acidic ribosomal protein P1, putative	RTT				GO:0003735,GO:0005622,GO:0005840,GO:0006414	60S acidic ribosomal protein P1 [Spodoptera frugiperda]	Ribosomal protein P2;Ribosomal protein 60S	structural constituent of ribosome;intracellular;ribosome;translational elongation				0.321277	0.171708	0.354139				0.13589	0.243506		-0.264458	0.0509724			0.392004	-0.454497
AAEL000450	ras gtpase activating protein	D				GO:0007165,GO:0007275,GO:0007610,GO:0009628,GO:0030234	ENSANGP00000002684 [Anopheles gambiae str. PEST]	Ras GTPase-activating protein;SH2 motif;Src homology-3;Variant SH3;Pleckstrin-like;C2	signal transduction;development;behavior;response to abiotic stimulus;enzyme regulator activity			0.236356	-0.113155	-0.0966111		-0.111204			0.079741	-0.118097		-0.247451					-0.205507
AAEL000451	beta1,4 mannosyltransferase	D				GO:0003677,GO:0005634,GO:0006412,GO:0006464,GO:0016740	ENSANGP00000010464 [Anopheles gambiae str. PEST]	Myb, DNA-binding;Glycosyl transferase, group 1	DNA binding;nucleus;protein biosynthesis;protein modification;transferase activity			0.265078	0.31522	0.0546963	0.28787	0.136957	0.246542	-0.289522	-0.195191	0.0501914	0.103627	-0.105101		-0.0303328	-0.211251	-0.318914
AAEL000452	histone acetyltransferase gcn5	D				GO:0005654,GO:0005694,GO:0006350,GO:0016740,GO:0043234,GO:0050789	ENSANGP00000003808 [Anopheles gambiae str. PEST]	Bromodomain;PCAF, N-terminal;GCN5lated N-acetyltransferase	nucleoplasm;chromosome;transcription;transferase activity;protein complex;regulation of biological process			0.286595	-0.368535				0.235475		-0.445588	-0.126446		-0.261189					-0.334078
AAEL000453	conserved hypothetical protein	D					PREDICTED: similar to reverse transcriptase [Danio rerio]	Retrotransposon gag protein
AAEL000454	isocitrate dehydrogenase	M				GO:0003824,GO:0005739,GO:0005975,GO:0006091,GO:0006519,GO:0009056,GO:0009058			catalytic activity			0.422609	0.501831	0.542784	0.381563	0.473841	0.431782	-0.133073	0.581985	0.636778	0.710267	1.04764	0.572044	0.619541	0.666073	0.307648	0.922969
AAEL000455	conserved hypothetical protein	U					ENSANGP00000010766 [Anopheles gambiae str. PEST]	Target SNARE coiled-coil region
AAEL000456	conserved hypothetical protein	D				GO:0005515,GO:0008270	AT15166p [Drosophila melanogaster]		protein binding;zinc ion binding			-0.681919	-0.719625	-0.794405	-0.911045	-0.786032	-0.721386	-0.490097	-0.99472	-0.0543468	-0.480631	-0.428312	0.683182	-0.554476	-0.389934	-0.421533	-0.746108
AAEL000457	conserved hypothetical protein	U					ENSANGP00000022600 [Anopheles gambiae str. PEST]	MORN motif
AAEL000458	conserved hypothetical protein	U										-0.485432	-0.266521	-0.226738	-0.23884	-0.430437	-0.251533	-0.293479			-0.2149	0.196649		-0.178274	-0.131801	-0.37798	0.147834
AAEL000459	conserved hypothetical protein	D				GO:0000139,GO:0005351,GO:0008643,GO:0016021	ENSANGP00000010984 [Anopheles gambiae str. PEST]		;sugar porter activity;carbohydrate transport;integral to membrane			-0.040666	-0.227243	-0.166265	0.461422	-0.246096	-0.338546	0.0404958	0.146208	0.549336	0.525996	0.25695	0.17436	0.15352	-0.618559	0.277608	0.325468
AAEL000460	conserved hypothetical protein	D				GO:0019867	ENSANGP00000019859 [Anopheles gambiae str. PEST]					0.0962288	0.149355	0.322539	0.0752239		-0.0802129	0.127491	0.264854	-0.161222	-0.20523	-0.314278	-0.194818		-0.242398	-0.228753	-0.414962
AAEL000461	conserved hypothetical protein	U										-0.327295	-0.840227	-0.430157	-0.969591	-0.609427	-0.795067	-0.630635	-0.378136	-0.226896	-0.185147	0.141542	0.296546	0.294213	0.191197	-0.180887	-0.367385
AAEL000462	conserved hypothetical protein	U					GA13647-PA [Drosophila pseudoobscura]
AAEL000463	hypothetical protein	RTT					probable ribonuclease e (rnase e) protein [Ralstonia solanacearum]
AAEL000464	conserved hypothetical protein	U					peptidyl prolyl cis-trans isomerase [Plasmodium yoelii yoelii str. 17XNL]
AAEL000465	conserved hypothetical protein	D					ENSANGP00000005634 [Anopheles gambiae str. PEST]	2OG-Fe(II) oxygenase
AAEL000466	voltage and ligand gated potassium channel	TRP				GO:0000003,GO:0004672,GO:0004871,GO:0005216,GO:0005886,GO:0006350,GO:0006811,GO:0007165,GO:0007582,GO:0007610,GO:0009628,GO:0043234,GO:0050789	ENSANGP00000002689 [Anopheles gambiae str. PEST]	EAG/ELK/ERG potassium channel;EAG potassium channel;Erg channel;K+ channel, two pore;ELK potassium channel;PAS;Ion transport;Ion transport 2, bacterial;Cyclic nucleotide-binding;PAS-associated, C-terminal;K+ channel, pore region;Cation channel, non-ligand	reproduction;protein kinase activity;signal transducer activity;ion channel activity;plasma membrane;transcription;ion transport;signal transduction;physiological process;behavior;response to abiotic stimulus;protein complex;regulation of biological proce
AAEL000467	mitochondrial ribosomal protein, L49, putative	REDOX/STRESS/MIT				GO:0005198,GO:0005739,GO:0005840,GO:0006412,GO:0008135	ENSANGP00000010903 [Anopheles gambiae str. PEST]	Mitochondrial large ribosomal subunit	structural molecule activity;mitochondrion;ribosome;protein biosynthesis;translation factor activity\, nucleic acid binding			-0.154051	0.115526		-0.140157	-0.195995		-0.187243		-0.286738		-0.197177	0.0856035		-0.211927	-0.275009	-0.268056
AAEL000468	mediator complex, subunit, putative	D				GO:0030528	ENSANGP00000017933 [Anopheles gambiae str. PEST]		transcription regulator activity			-0.132199	-0.24028		-0.39625	-0.293596	-0.324088	-0.221429	-0.249233	-0.310919		0.207413	-0.253882	-0.0491684	-0.234067	0.0410789	-0.24908
AAEL000469	conserved hypothetical protein	D				GO:0003676,GO:0005215,GO:0005488,GO:0005634	ENSANGP00000002766 [Anopheles gambiae str. PEST]	Zinc finger, ZZ-type	nucleic acid binding;transporter activity;binding;nucleus											0.627917	0.735385	0.603552	0.455203	0.634539	0.60823	0.539312	0.551065
AAEL000470	hypothetical protein	U
AAEL000471	monocarboxylate transporter	TRP				GO:0005215,GO:0006811	ENSANGP00000022354 [Anopheles gambiae str. PEST]	Major facilitator superfamily MFS_1;Major facilitator superfamily	transporter activity;ion transport											-0.228518	0.0528351	-0.284805		-0.250717	-0.330333	-0.316753	-0.801123
AAEL000472	zinc finger protein, putative	D				GO:0005515,GO:0008270	PREDICTED: similar to arkadia-like 2 [Canis familiaris]	Zinc finger, RING-type	protein binding;zinc ion binding				-0.185967	-0.153775	-0.223886	-0.464994	-0.645583		-0.252475	-0.488461	-0.359246	-0.147884		-0.449564	-0.768335	-0.421162
AAEL000473	hypothetical protein	U													-0.189682				-0.433718
AAEL000474	conserved hypothetical protein	U					ENSANGP00000014718 [Anopheles gambiae str. PEST]	Delayed-early response protein/equilibrative nucleoside transporter;Major facilitator superfamily MFS_1
AAEL000475	conserved hypothetical protein	U											0.25524			0.118398	-0.0232981	0.162999	0.248506	-0.469772	-0.180075	-0.292959		-0.245244	-0.309654	-0.165432
AAEL000476	conserved hypothetical protein	U
AAEL000477	nadph fad oxidoreductase	REDOX/STRESS/MIT				GO:0006118,GO:0016491	ENSANGP00000018507 [Anopheles gambiae str. PEST]	Flavoprotein pyridine nucleotide cytochrome reductase;FAD-binding;Oxidoreductase FAD/NAD(P)-binding	electron transport;oxidoreductase activity			-0.186617	-0.341901			-0.166589			0.0517395	0.178644	0.171755		0.186617	0.14313	0.196941	0.0980894
AAEL000478	Sm protein G, putative	D				GO:0005634,GO:0005730,GO:0005732,GO:0006139,GO:0006397,GO:0043234	GA18077-PA [Drosophila pseudoobscura]	Like-Sm ribonucleoprotein, core	nucleus;nucleolus;small nucleolar ribonucleoprotein complex;nucleobase\, nucleoside\, nucleotide and nucleic acid metabolism;mRNA processing;protein complex			-0.176981			0.190961		0.157371	-0.45419		-0.122331	-0.388083	-0.45851	0.000194087	-0.296703		-0.218764	-0.417427
AAEL000479	conserved hypothetical protein	D				GO:0005515	ENSANGP00000008530 [Anopheles gambiae str. PEST]	Synaptotagmin;C2	protein binding
AAEL000480	hypothetical protein	D					ENSANGP00000028552 [Anopheles gambiae str. PEST]	Tetratricopeptide TPR_1;Transcription factor jumonji;Tetratricopeptide region
AAEL000481	rab3 interacting molecule	D				GO:0005515,GO:0006810,GO:0007267,GO:0016023,GO:0030234,GO:0050789	Rim CG33547-PA [Drosophila melanogaster]	Zinc finger, FYVE-type;Rab-binding	protein binding;transport;cell-cell signaling;cytoplasmic membrane-bound vesicle;enzyme regulator activity;regulation of biological process
AAEL000482	histone H3	RTT
AAEL000483	exostosin-2	D				GO:0005623,GO:0005783,GO:0005794,GO:0005975,GO:0007165,GO:0007582,GO:0009058,GO:0009790,GO:0016740,GO:0019538	ENSANGP00000008532 [Anopheles gambiae str. PEST]	Exostosin-like	cell;endoplasmic reticulum;Golgi apparatus;carbohydrate metabolism;signal transduction;physiological process;biosynthesis;embryonic development;transferase activity;protein metabolism												-0.269071					-0.269321	-0.106182
AAEL000484	conserved hypothetical protein	U					CG11693-PA [Drosophila melanogaster]						-0.492717			-0.356298	-0.303223	-0.333602	-0.35546		0.362598	0.711419		0.496848	0.417289	0.192908	0.450146
AAEL000485	paramyosin, putative	CS				GO:0005509,GO:0005739	ENSANGP00000017788 [Anopheles gambiae str. PEST]	LETM1-like;Calcium-binding EF-hand	calcium ion binding			-0.20733	-0.169481	-0.349627	-0.427233	-0.374348	-0.634686	-0.480121	-0.315371	-0.449161	-0.312173		0.140419	-0.343186	-0.326033	-0.526003	-0.286576
AAEL000486	chaperonin	D				GO:0000166,GO:0004672,GO:0005515,GO:0005829,GO:0006464,GO:0016787,GO:0019538,GO:0043234	ENSANGP00000024201 [Anopheles gambiae str. PEST]	Protein kinase;Chaperonin TCP-1;Chaperonin Cpn60/TCP-1;Chaperonin Cpn60	nucleotide binding			0.263106	0.413099	-0.0459007	-0.322296	-0.25523	0.0538194	0.113395	0.00158961	0.145259	0.134985	-0.126935	-0.263106		-0.307265	0.195996	-0.270844
AAEL000487	hypothetical protein	U					ENSANGP00000017462 [Anopheles gambiae str. PEST]	SPla/RYanodine receptor SPRY									0.159533				-0.35943			-0.479676	-0.295005
AAEL000488	conserved hypothetical protein	U					ENSANGP00000029408 [Anopheles gambiae str. PEST]
AAEL000489	P21-activated kinase, pak	D				GO:0000166,GO:0004672,GO:0004871,GO:0005856,GO:0005886,GO:0006464,GO:0007010,GO:0007165,GO:0008283,GO:0009653,GO:0009790,GO:0016043,GO:0030154,GO:0050789	ENSANGP00000008440 [Anopheles gambiae str. PEST]	Protein kinase;Serine/threonine protein kinase, active site;Tyrosine protein kinase;PAK-box/P21o-binding	nucleotide binding;protein kinase activity;signal transducer activity;cytoskeleton;plasma membrane;protein modification;cytoskeleton organization and biogenesis;signal transduction;cell proliferation;morphogenesis;embryonic development;cell organization a			0.0907734	0.287136	0.261512	-0.315328	-0.271081	-0.118893	-0.206499	-0.330736	-0.608217	0.0784759	-0.286471	-0.0907734	-0.243405	-0.493525	-0.670394	-0.884958
AAEL000490	histone H4	RTT																				0.0444062					-0.194389
AAEL000491	hypothetical protein	TRP				GO:0005975,GO:0007165,GO:0009058,GO:0009653,GO:0016740,GO:0019538	ENSANGP00000015201 [Anopheles gambiae str. PEST]	H+-transporting two-sector ATPase, alpha/beta subunit, central region;Heparan sulphate 6-sulfotransferase	carbohydrate metabolism;signal transduction;biosynthesis;morphogenesis;transferase activity;protein metabolism
AAEL000492	histone H3	RTT
AAEL000493	heparan sulfate 6-o-sulfotransferase	D				GO:0005975,GO:0007165,GO:0009058,GO:0009653,GO:0016740,GO:0019538	ENSANGP00000015201 [Anopheles gambiae str. PEST]	Heparan sulphate 6-sulfotransferase	carbohydrate metabolism;signal transduction;biosynthesis;morphogenesis;transferase activity;protein metabolism
AAEL000494	histone h2a	RTT				GO:0003677,GO:0005694,GO:0006259,GO:0006996,GO:0019538,GO:0043234			DNA binding;chromosome;DNA metabolism;organelle organization and biogenesis;protein metabolism;protein complex				-0.0870058	-0.234408	-0.180447		0.857592		-0.330201	-1.13587	-1.27444	-0.332153	-1.64796	-1.35568	-0.660563	-1.51274	-0.214025
AAEL000495	secreted glutathione peroxidase, putative	I				GO:0004602,GO:0006979	ENSANGP00000013972 [Anopheles gambiae str. PEST]	Glutathione peroxidase	glutathione peroxidase activity;response to oxidative stress
AAEL000496	conserved hypothetical protein	D				GO:0004601	ENSANGP00000028732 [Anopheles gambiae str. PEST]	Animal haem peroxidase	peroxidase activity
AAEL000497	histone h2a	RTT				GO:0003677,GO:0005694,GO:0006259,GO:0006996,GO:0019538,GO:0043234			DNA binding;chromosome;DNA metabolism;organelle organization and biogenesis;protein metabolism;protein complex				0.185709		-0.296022		0.596125		-0.310654	-1.22996	-1.21454	-0.354848	-1.79636	-1.36952	-1.11882	-1.61876	-0.175407
AAEL000498	defective proboscis extension response, putative	I				GO:0007154,GO:0007165	CG14521-PA [Drosophila melanogaster]	Immunoglobulin I-set;Immunoglobulin V-set;Immunoglobulin;Immunoglobulin-like	cell communication;signal transduction
AAEL000499	Sp?tzle 1B (Spz1B)	I					spatzle CG6134-PE, isoform E [Drosophila melanogaster]													0.59712	0.333806	0.161523		0.321069	0.276977	0.417983	0.107068
AAEL000500	conserved hypothetical protein	D					ENSANGP00000017475 [Anopheles gambiae str. PEST]	Hormone binding				1.11992	0.263473	0.460013	0.444681	0.747066	0.373507					1.57722
AAEL000501	histone H4	RTT																			0.100875						-0.0325866
AAEL000502	nadph fad oxidoreductase	REDOX/STRESS/MIT				GO:0003824,GO:0005489,GO:0006118	ENSANGP00000013762 [Anopheles gambiae str. PEST]	Flavoprotein pyridine nucleotide cytochrome reductase;Phenol hydroxylase reductase;FAD-binding;Oxidoreductase FAD/NAD(P)-binding	catalytic activity;electron transporter activity;electron transport											-0.0716315	-0.271851			-0.287546	-0.570101	-0.212281	-0.378513
AAEL000503	hypothetical protein	D					PREDICTED: similar to glutamate receptor, ionotropic, NMDA2D [Danio rerio]						-0.131302		-0.202318				-0.223487	0.366839	0.515065	-0.0894644		0.278307	0.180897	0.331812	-0.2131
AAEL000504	conserved hypothetical protein	U					ENSANGP00000028837 [Anopheles gambiae str. PEST]
AAEL000505	conserved hypothetical protein	D				GO:0005554	ENSANGP00000012952 [Anopheles gambiae str. PEST]	Protein of unknown function DUF227	molecular function unknown
AAEL000506	histone H3	RTT						Histone H3;Histone core;Histone-fold/TFIID-TAF/NF-Y
AAEL000507	conserved hypothetical protein	D				GO:0004601	ENSANGP00000028732 [Anopheles gambiae str. PEST]	Animal haem peroxidase	peroxidase activity
AAEL000508	fibrinogen and fibronectin	I	none	FREP	FREP		ENSANGP00000011564 [Anopheles gambiae str. PEST]	Fibrinogen, alpha/beta/gamma chain, C-terminal globular		Aaeg:N42927
AAEL000509	rho gtpase activating protein	D					ENSANGP00000011534 [Anopheles gambiae str. PEST]	RhoGAP												0.374537	-0.0255248	-0.384201		-0.0839606	-0.0878631	0.333802	-0.289538
AAEL000510	conserved hypothetical protein	D				GO:0003676,GO:0005622	ENSANGP00000017111 [Anopheles gambiae str. PEST]	D111/G-patch;Prolinech region	nucleic acid binding;intracellular				0.200295							-0.301216	0.482815	-0.322726		0.305595	0.250077	-0.287601
AAEL000511	acetylcholinesterase	TRP				GO:0005623,GO:0005737,GO:0005886,GO:0006519,GO:0006810,GO:0007267,GO:0007582,GO:0009056,GO:0009628,GO:0016787	acetylcholinesterase [Aedes aegypti]	Carboxylesterase, type B;Cholinesterase;Vacuolating cytotoxin;Esterase/lipase/thioesterase	cell;cytoplasm;plasma membrane;amino acid and derivative metabolism;transport;cell-cell signaling;physiological process;catabolism;response to abiotic stimulus;hydrolase activity															0.39013	0.315182
AAEL000512	dynein heavy chain	CS				GO:0000166,GO:0003677,GO:0003774,GO:0005198,GO:0005509,GO:0005856,GO:0006350,GO:0006810,GO:0007010,GO:0007165,GO:0007582,GO:0016787,GO:0043234,GO:0050789	Dynein heavy chain at 16F CG7092-PA [Drosophila melanogaster]	Calcium-binding EF-hand;Sigma-54 factor, interaction region;ATPase associated with various cellular activities, AAA-5;Dynein heavy chain;ATP/GTP-binding site motif A (P-loop)	nucleotide binding;DNA binding;motor activity;structural molecule activity;calcium ion binding;cytoskeleton;transcription;transport;cytoskeleton organization and biogenesis;signal transduction;physiological process;hydrolase activity;protein complex;regul
AAEL000513	histone H4	RTT																				0.0923814					-0.209885
AAEL000514	hypothetical protein	U					hypothetical protein [Oryza sativa (japonica cultivar-group)]
AAEL000515	Juvenile hormone-inducible protein, putative	D				GO:0005554	ENSANGP00000019356 [Anopheles gambiae str. PEST]	Protein of unknown function DUF227	molecular function unknown				-0.663593	0.195826		0.409998	0.546736		0.221649			-0.216063	-0.507138	-0.153312	-0.721058	-0.367711	-0.602929
AAEL000516	Juvenile hormone-inducible protein, putative	D				GO:0005554	ENSANGP00000019371 [Anopheles gambiae str. PEST]	Protein of unknown function DUF227	molecular function unknown				0.17432	-0.215635	0.413521		0.183962	-0.147634	-0.962895
AAEL000517	histone H4	RTT																									-0.181795
AAEL000518	histone h2a	RTT				GO:0003677,GO:0005694,GO:0006259,GO:0006996,GO:0019538,GO:0043234			DNA binding;chromosome;DNA metabolism;organelle organization and biogenesis;protein metabolism;protein complex				0.0495994	-0.262146	-0.207721		0.847833		-0.372632	-0.76524	-1.38458	-0.315922	-1.59738	-1.47312	-1.09561	-1.56844	-0.201293
AAEL000519	hypothetical protein	U					ENSANGP00000026895 [Anopheles gambiae str. PEST]
AAEL000520	conserved hypothetical protein	U					ENSANGP00000011251 [Anopheles gambiae str. PEST]	Protein of unknown function DUF227
AAEL000521	hypothetical protein	U					two component transcriptional regulator, winged helix family [Burkholderia sp. 383]
AAEL000522	hypothetical protein	U					Epa4p [Candida glabrata]
AAEL000523	ring finger protein	TRP				GO:0005515,GO:0007610,GO:0008270,GO:0009628	murashka CG9381-PC, isoform C [Drosophila melanogaster]		protein binding;behavior;zinc ion binding;response to abiotic stimulus
AAEL000524	regulating synaptic membrane exocytosis protein	D				GO:0005515,GO:0006810,GO:0007267,GO:0016023,GO:0030234,GO:0050789	GA20257-PA [Drosophila pseudoobscura]	Synaptotagmin;C2	protein binding;transport;cell-cell signaling;cytoplasmic membrane-bound vesicle;enzyme regulator activity;regulation of biological process
AAEL000525	histone h2a	RTT				GO:0003677,GO:0005694,GO:0006259,GO:0006996,GO:0019538,GO:0043234	CG31618-PA [Drosophila melanogaster]	Histone H2A;Histone core;Transcription factor CBF/NF-Y/archaeal histone;Histone-fold/TFIID-TAF/NF-Y	DNA binding;chromosome;DNA metabolism;organelle organization and biogenesis;protein metabolism;protein complex					-0.207477	-0.211828		0.830327		-0.306712	-1.27836	-1.27401	-0.333858	-1.74527	-1.40226	-1.18218	-1.69325	-0.197162
AAEL000526	conserved hypothetical protein	U					ENSANGP00000001833 [Anopheles gambiae str. PEST]
AAEL000527	polynucleotide kinase- 3'-phosphatase	D				GO:0006139,GO:0006259,GO:0006950,GO:0009719,GO:0016301	ENSANGP00000009138 [Anopheles gambiae str. PEST]		nucleobase\, nucleoside\, nucleotide and nucleic acid metabolism;DNA metabolism;response to stress;response to endogenous stimulus;kinase activity											-0.257475	-0.241908	-0.0498553	-0.331481		-0.0979054
AAEL000528	conserved hypothetical protein	D					ENSANGP00000026288 [Anopheles gambiae str. PEST]	Rhodopsin-like GPCR superfamily
AAEL000529	conserved hypothetical protein	D				GO:0003735,GO:0005622,GO:0005840,GO:0006412			structural constituent of ribosome;intracellular;ribosome;protein biosynthesis			-0.30648	-0.581646	-0.470329	-0.35082	-0.368074	-0.40412	-0.367649	-0.142906		-0.463316	-0.340886	-0.189105	-0.173492		0.136752	-0.19973
AAEL000530	carboxylesterase	REDOX/STRESS/MIT				GO:0016787	ENSANGP00000027200 [Anopheles gambiae str. PEST]	Lipase, active site;Carboxylesterase, type B;Regulator of chromosome condensation, RCC1;Esterase/lipase/thioesterase	hydrolase activity											-0.207124	-0.278566	-0.0753587			0.162871		-0.1064
AAEL000531	conserved hypothetical protein	U					unknown protein [Arabidopsis thaliana]	Antifreeze protein, type I;Ribosomal protein P2				-0.0335186	-0.859085			-0.0247626	-0.261019	-0.225842	-0.156506	-0.156928			0.0335186	0.0286413	-0.136265	-0.161398	-0.249086
AAEL000532	conserved hypothetical protein	REDOX					ENSANGP00000000830 [Anopheles gambiae str. PEST]	Haem peroxidase, plant/fungal/bacterial;CUB;Low density lipoproteinceptor, class A
AAEL000533	antifreeze protein, putative	I	CTL16	CTL	CTL	GO:0005529		C-type lectin	sugar binding	Aaeg:N31589		0.142478	-0.47629	-0.34261	-0.252826	-0.419947	-0.157158	-0.0429912	-0.699446	-0.375383	-0.225091	-0.529266	-0.23798	-0.391701	-0.515902	-0.536594	-0.399014
AAEL000534	pickpocket	TRP				GO:0005216,GO:0005623,GO:0006811	ENSANGP00000016463 [Anopheles gambiae str. PEST]	Na+ channel, amiloride-sensitive	ion channel activity;cell;ion transport
AAEL000535	conserved hypothetical protein	I				GO:0005529		C-type lectin	sugar binding
AAEL000536	conserved hypothetical protein	D				GO:0005576,GO:0007165	klingon CG6669-PA [Drosophila melanogaster]	Vascular endothelial growth factor receptor, VEGFR;Immunoglobulin V-set;Immunoglobulin;Immunoglobulin I-set;Immunoglobulin-like	extracellular region;signal transduction
AAEL000537	hypothetical protein	U					hypothetical protein DDB0215303 [Dictyostelium discoideum]
AAEL000538	conserved hypothetical protein	U					ENSANGP00000028340 [Anopheles gambiae str. PEST]	Low density lipoproteinceptor, class A
AAEL000539	hypothetical protein	U											0.128784	0.372174	-0.0749891		0.307316	0.214494	0.243927	-0.263384	0.501854	0.669634		0.48811	0.379936	0.188065	0.396666
AAEL000540	fasciclin, putative	D				GO:0000003,GO:0005623,GO:0005886,GO:0007610,GO:0008037,GO:0009628,GO:0009653,GO:0016043,GO:0030154			reproduction				0.197579		-0.135179	-0.164238			-0.503016		-0.215043	0.591588		0.140722	-0.23833		-0.164004
AAEL000541	fasciclin, putative	D				GO:0005272,GO:0006814,GO:0016020	ENSANGP00000018116 [Anopheles gambiae str. PEST]	CD80-like C2-set immunoglobulin;Immunoglobulin-like	sodium channel activity			0.648091	0.368264	0.527037	0.342168	0.510393	0.174991		0.564698	0.403909	-0.1679	0.132864	-0.38386	-0.645638		0.135864	0.271969
AAEL000542	conserved hypothetical protein	D				GO:0006118,GO:0016491	CG13611-PA [Drosophila melanogaster]	Flavin-containing amine oxidase;FAD-dependent pyridine nucleotide-disulphide oxidoreductase;Pyridine nucleotide-disulphide oxidoreductase, class I;Adrenodoxin reductase;Amine oxidase	electron transport;oxidoreductase activity
AAEL000543	galactose-specific C-type lectin, putative	I	CTLMA11	CTL	CTL	GO:0005529	ENSANGP00000020938 [Anopheles gambiae str. PEST]	C-type lectin	sugar binding	Aaeg:N31577										-0.671054	-0.984433	-0.344854		0.191767	0.125884	-0.058503	0.546765
AAEL000544	hypothetical protein	D					PREDICTED: similar to jumonji domain containing 1B, partial [Strongylocentrotus purpuratus]													-1.64304	-0.955991	-0.457049	-1.71261	-0.879991	-0.496113	-1.4269	-0.32938
AAEL000545	carboxylesterase	REDOX/STRESS/MIT				GO:0006629,GO:0007165,GO:0007267,GO:0009056,GO:0016787,GO:0019748	ENSANGP00000022302 [Anopheles gambiae str. PEST]	Lipase, active site;Carboxylesterase, type B;Regulator of chromosome condensation, RCC1;Esterase/lipase/thioesterase	lipid metabolism;signal transduction;cell-cell signaling;catabolism;hydrolase activity;secondary metabolism
AAEL000546	carboxylesterase	REDOX/STRESS/MIT					ENSANGP00000022302 [Anopheles gambiae str. PEST]	Lipase, active site;Carboxylesterase, type B;Regulator of chromosome condensation, RCC1;Esterase/lipase/thioesterase					0.553668	0.326547			0.37024	0.175105	0.14719	-0.912272			-0.498247		-0.0198645
AAEL000547	pickpocket	TRP				GO:0005216,GO:0005623,GO:0006811	ENSANGP00000016463 [Anopheles gambiae str. PEST]	Na+ channel, amiloride-sensitive	ion channel activity;cell;ion transport
AAEL000549	fibulin 1 and	D				GO:0004672,GO:0004872,GO:0005198,GO:0005509,GO:0005578,GO:0006464,GO:0007165	ENSANGP00000017954 [Anopheles gambiae str. PEST]	Aspartic acid and asparagine hydroxylation site;EGF-like region;EGF-like calcium-binding;EGF calcium-binding;EGF-like;EGF-like, type 3	protein kinase activity;receptor activity;structural molecule activity;calcium ion binding;extracellular matrix (sensu Metazoa);protein modification;signal transduction			-0.284753	-0.385727	0.167507	-0.21256		-0.326755		0.292118			0.517726					0.706562
AAEL000550	werner helicase interacting protein	D				GO:0005524,GO:0016887	ENSANGP00000017992 [Anopheles gambiae str. PEST]		ATP binding;ATPase activity
AAEL000551	hypothetical protein (pacifastin light chain [Culex quinquefasciatus])	D				GO:0030414	pacifastin light chain [Culex quinquefasciatus]	EGF-like region;Proteinase inhibitor I19, pacifastin	protease inhibitor activity											-0.390306	-0.132855	-0.101195			-0.0535218	-0.310747	-0.226362
AAEL000552	pickpocket	TRP				GO:0005216,GO:0005623,GO:0006811	ENSANGP00000016463 [Anopheles gambiae str. PEST]	Na+ channel, amiloride-sensitive	ion channel activity;cell;ion transport
AAEL000553	tropomyosin, putative	CS					PREDICTED: similar to mKIAA1601 protein [Apis mellifera]
AAEL000554	fasciclin, putative	D					ENSANGP00000018125 [Anopheles gambiae str. PEST]	CD80-like C2-set immunoglobulin;Immunoglobulin-like
AAEL000555	hypothetical protein	U										0.583603				0.854174	0.597872		1.38977	0.534102				1.4379	1.00873		1.03693
AAEL000556	galactose-specific C-type lectin, putative	I				GO:0005529	putative salivary C type lectin [Aedes albopictus]	C-type lectin	sugar binding											-0.943571	-0.8168	-0.31006	-1.1942	-0.97154	-0.628571	-0.841382	-0.623397
AAEL000557	conserved hypothetical protein	U					ENSANGP00000018128 [Anopheles gambiae str. PEST]
AAEL000558	neural stem cell-derived dendrite regulator	M				GO:0003824,GO:0006629,GO:0016787	ENSANGP00000014014 [Anopheles gambiae str. PEST]	Lipase, active site;Lipase, class 3	catalytic activity;lipid metabolism;hydrolase activity										-0.119908		-0.166761
AAEL000559	glycosyl transferase	M				GO:0005975,GO:0006412,GO:0006464,GO:0016740	ENSANGP00000008208 [Anopheles gambiae str. PEST]	Glycosyl transferase, group 1	carbohydrate metabolism;protein biosynthesis;protein modification;transferase activity
AAEL000560	hypothetical protein	U					ENSANGP00000017311 [Anopheles gambiae str. PEST]															1.41657					1.3327
AAEL000561	hypothetical protein	U					CG32202-PA [Drosophila melanogaster]						0.185328								-0.290848	-0.563054				-0.729309
AAEL000562	conserved hypothetical protein	U					ENSANGP00000013749 [Anopheles gambiae str. PEST]					-0.194202	0.181296	-0.0143785	-0.235765	-0.113528		-0.228075	0.0289037	0.118508	0.211512	-0.0266405	0.194202	0.202627	0.299342	0.129141	0.0877558
AAEL000563	galactose-specific C-type lectin, putative	I				GO:0005529	putative salivary C type lectin [Aedes albopictus]	C-type lectin	sugar binding
AAEL000564	myotubularin	D				GO:0000166,GO:0004672,GO:0004721,GO:0005488,GO:0006464			nucleotide binding
AAEL000565	hypothetical protein	D				GO:0005654,GO:0009653	ENSANGP00000013737 [Anopheles gambiae str. PEST]	Eggshell protein;Prion protein	nucleoplasm;morphogenesis						-0.338059						-0.335365			-1.21682	-1.39708		-1.49409
AAEL000566	conserved hypothetical protein	U					CG4269-PA [Drosophila melanogaster]														1.42774	0.749987		1.2972	0.495672	1.63752
AAEL000567	sugar transporter	TRP				GO:0005215,GO:0005623,GO:0005975,GO:0006810	ENSANGP00000022770 [Anopheles gambiae str. PEST]	Sugar transporter superfamily;Sugar transporter;General substrate transporter;Major facilitator superfamily MFS_1;Major facilitator superfamily	transporter activity;cell;carbohydrate metabolism;transport				0.876616	0.267857	0.227022			0.418113	-0.483329	-0.508971		-0.309632			-0.157675	-0.0658196	-0.502342
AAEL000568	26S proteasome non-atpase regulatory subunit	D				GO:0005622,GO:0007582,GO:0008233,GO:0009056,GO:0019538,GO:0043234			intracellular;physiological process;peptidase activity;catabolism;protein metabolism;protein complex					-0.0843689		-0.158115	-0.270275					-0.176394			-0.239783
AAEL000569	omega-crystallin, putative	D					ENSANGP00000008467 [Anopheles gambiae str. PEST]	Tropomyosin;GRIP
AAEL000570	conserved hypothetical protein	U					ENSANGP00000007214 [Anopheles gambiae str. PEST]												-0.124898	-0.237479	-0.365203					-0.46159
AAEL000571	hypothetical protein	U					ENSANGP00000026455 [Anopheles gambiae str. PEST]
AAEL000572	AMP dependent ligase	M				GO:0003824,GO:0005215,GO:0005886,GO:0006629,GO:0006810	ENSANGP00000012858 [Anopheles gambiae str. PEST]	AMP-dependent synthetase and ligase	catalytic activity;transporter activity;plasma membrane;lipid metabolism;transport										0.549217	0.282117				-0.176235		0.14634	-0.216719
AAEL000573	conserved hypothetical protein	U					ENSANGP00000025993 [Anopheles gambiae str. PEST]
AAEL000574	conserved hypothetical protein	D				GO:0003824,GO:0005489,GO:0005623,GO:0006118,GO:0006464,GO:0008152,GO:0019538			catalytic activity			0.106859	0.11696	0.49313	-0.114488		0.445624	0.295841	0.395618	0.242799	0.19283	0.518388	0.0769991		0.521199	0.446255	0.559898
AAEL000575	apyrase, putative	D				GO:0006139,GO:0009056,GO:0016787	putative 5' nucleotidase [Anopheles gambiae]	Protein kinase;5'-Nucleotidase and apyrase;Metallophosphoesterase;5'-Nucleotidase, C-terminal	nucleobase\, nucleoside\, nucleotide and nucleic acid metabolism;catabolism;hydrolase activity			-0.459863	-0.244385	0.304953	0.29825	0.800069	0.945758	0.109718	1.29105	-0.955335	0.18339	-0.226034	-0.202376	-0.370314		-0.62919	0.357172
AAEL000576	lachesin, putative	D				GO:0007154,GO:0007165	RE04226p [Drosophila melanogaster]	Interleukin-1 receptor, type I and type II;Immunoglobulin I-set;Immunoglobulin V-set;Immunoglobulin;Immunoglobulin-like	cell communication;signal transduction
AAEL000577	DNA binding protein elf-1	D				GO:0003677,GO:0005634,GO:0006350,GO:0007275,GO:0009058,GO:0009653,GO:0016043,GO:0030154,GO:0030528,GO:0050789	GA18626-PA [Drosophila pseudoobscura]	CP2 transcription factor	DNA binding;nucleus;transcription;development;biosynthesis;morphogenesis;cell organization and biogenesis;cell differentiation;transcription regulator activity;regulation of biological process
AAEL000578	conserved hypothetical protein	D				GO:0003824,GO:0005198,GO:0006464,GO:0019538	ENSANGP00000022334 [Anopheles gambiae str. PEST]	Tubulin-tyrosine ligase	catalytic activity;structural molecule activity;protein modification;protein metabolism
AAEL000579	conserved hypothetical protein	U					ENSANGP00000017872 [Anopheles gambiae str. PEST]	Protein of unknown function DUF974
AAEL000580	conserved hypothetical protein	D				GO:0003824,GO:0005198,GO:0006464,GO:0019538	ENSANGP00000022337 [Anopheles gambiae str. PEST]	Tubulin-tyrosine ligase	catalytic activity;structural molecule activity;protein modification;protein metabolism
AAEL000581	conserved hypothetical protein	D				GO:0009607,GO:0009628,GO:0016787	putative 5-oxoprolinase [Anopheles gambiae]	Hydantoinaseoxoprolinase, N-terminal;Hydantoinase/oxoprolinase;Hydantoinase B/oxoprolinase	response to biotic stimulus;response to abiotic stimulus;hydrolase activity			-0.573235	-0.671675	-0.248165	-0.497318	-0.700607	-2.0911	-1.10535	-0.264456		-0.514253	-0.155164	0.573235	-0.576572			-0.475538
AAEL000582	pickpocket	TRP				GO:0005216,GO:0005623,GO:0006811	putative Na+ channel [Anopheles gambiae]	Na+ channel, amiloride-sensitive	ion channel activity;cell;ion transport
AAEL000583	peroxisome assembly factor-2 (peroxisomal-type atpase 1)	REDOX/STRESS/MIT				GO:0000166,GO:0005777,GO:0006996,GO:0016787	ENSANGP00000018134 [Anopheles gambiae str. PEST]	AAA-protein subdomain;Peptidase S16, lon protease;AAA ATPase, central region;ATPase associated with various cellular activities, AAA-5	nucleotide binding;peroxisome;organelle organization and biogenesis;hydrolase activity				0.188347							-0.115978	0.169302	-0.3804		0.207039	0.109214		-0.452108
AAEL000584	sex-determining region y protein, sry	D				GO:0003700,GO:0005515,GO:0005634,GO:0006350,GO:0007275,GO:0007582,GO:0050789	ENSANGP00000022331 [Anopheles gambiae str. PEST]	High mobility group proteins HMG1 and HMG2;Antifreeze protein, type I;HMG1/2 (high mobility group) box	transcription factor activity;protein binding;nucleus;transcription;development;physiological process;regulation of biological process
AAEL000585	hypothetical protein	CS				GO:0005198,GO:0005576,GO:0005975,GO:0030246	RE37895p [Drosophila melanogaster]	Chitin binding Peritrophin-A	structural molecule activity;extracellular region;carbohydrate metabolism;carbohydrate binding
AAEL000586	hypothetical protein	U					Hypothetical protein F35F11.1 [Caenorhabditis elegans]					0.478401					0.45269			-0.357157	-0.51436		-0.478401	0.182249	0.433963
AAEL000587	hypothetical protein	U										0.776078		0.41174		0.515543	0.6555	0.648521	0.468587	0.345034	-0.272447	-0.39014	-0.58368	-0.32362	-0.476797	-0.0110814	-0.768731
AAEL000588	conserved hypothetical protein	D					ENSANGP00000007214 [Anopheles gambiae str. PEST]	Zinc finger, RING-type						0.101683						-0.10491	-0.666907	-0.0574911		-0.201221		-0.225328
AAEL000589	serine/threonine protein kinase	D				GO:0000166,GO:0004672,GO:0004871,GO:0006464,GO:0007010,GO:0007165,GO:0008219,GO:0050789	ENSANGP00000022332 [Anopheles gambiae str. PEST]	Protein kinase;Tyrosine protein kinase	nucleotide binding;protein kinase activity;signal transducer activity;protein modification;cytoskeleton organization and biogenesis;signal transduction;cell death;regulation of biological process											0.281515	0.53289	0.321735		0.239218	0.410336	0.534365	-0.287952
AAEL000590	conserved hypothetical protein	D				GO:0003824,GO:0005198,GO:0005488,GO:0005622,GO:0005856,GO:0006464,GO:0007267,GO:0007582,GO:0009607,GO:0043234	ENSANGP00000029584 [Anopheles gambiae str. PEST]	Zinc finger, RING-type;Band 4.1	catalytic activity;structural molecule activity;binding;intracellular;cytoskeleton;protein modification;cell-cell signaling;physiological process;response to biotic stimulus;protein complex			-0.340822	0.311573		0.225815	0.378519	0.43017	0.258115		0.321535				-0.015968	0.156544	0.457953
AAEL000591	hypothetical protein	D				GO:0005654,GO:0009653	plexus CG4444-PA [Drosophila melanogaster]		nucleoplasm;morphogenesis
AAEL000592	hypothetical protein	D					Glycine hydroxymethyltransferase [Pseudomonas fluorescens PfO-1]
AAEL000593	mitochondrial 18 kda protein (mtp18)	REDOX/STRESS/MIT					putative protein [Anopheles gambiae]													0.188543	-0.292748	-0.487289		-0.364426	-0.214628		-0.0723291
AAEL000594	conserved hypothetical protein	D				GO:0005730	ENSANGP00000017863 [Anopheles gambiae str. PEST]	Forkhead-associated;Prolinech region	nucleolus			0.0946098	-0.0975091	0.0380452	-0.128926	0.121244	0.45447	0.259956	0.130433	-0.104519	-0.0237928	-0.520925	0.0840072	0.0696409	-0.0900684	-0.0603056	-0.119477
AAEL000595	beat protein	D				GO:0005576	ENSANGP00000012767 [Anopheles gambiae str. PEST]	Immunoglobulin;CD80-like C2-set immunoglobulin;Immunoglobulin-like	extracellular region
AAEL000596	myosin	CS				GO:0000166,GO:0003774,GO:0004672,GO:0004871,GO:0005198,GO:0005515,GO:0005737,GO:0005856,GO:0005886,GO:0006464,GO:0007010,GO:0007582,GO:0008092,GO:0008289,GO:0009605,GO:0009628,GO:0015031,GO:0016043,GO:0016787,GO:0043234	ENSANGP00000010150 [Anopheles gambiae str. PEST]	Tyrosine protein kinase, active site;Myosin head, motor region;Tyrosine protein kinase;Protein kinase;IQ calmodulin-binding region	nucleotide binding;motor activity;protein kinase activity;signal transducer activity;structural molecule activity;protein binding;cytoplasm;cytoskeleton;plasma membrane;protein modification;cytoskeleton organization and biogenesis;physiological process;cy
AAEL000597	cadherin	CS				GO:0004872,GO:0005198,GO:0005509,GO:0005515,GO:0005623,GO:0005886,GO:0007165,GO:0009653,GO:0016043,GO:0030154,GO:0050789	ENSANGP00000001731 [Anopheles gambiae str. PEST]	Aspartic acid and asparagine hydroxylation site;EGF-like region;Cadherin;EGF-like;Laminin G, subdomain 1;Laminin G, subdomain 2;EGF, extracellular;Cadherin cytoplasmic region;Laminin G;EGF-like, type 3	receptor activity;structural molecule activity;calcium ion binding;protein binding;cell;plasma membrane;signal transduction;morphogenesis;cell organization and biogenesis;cell differentiation;regulation of biological process			-0.0843013	-0.441302	-0.907192		-0.47533	-0.470064	-0.523242	-1.2239
AAEL000598	antibacterial peptide, putative	I				GO:0005576,GO:0006961			extracellular region;antibacterial humoral response (sensu Protostomia)											2.00776		0.981001
AAEL000599	wingless protein, putative	D				GO:0000003,GO:0004871,GO:0005102,GO:0005576,GO:0005886,GO:0006350,GO:0007010,GO:0007049,GO:0007165,GO:0007275,GO:0008152,GO:0008219,GO:0008283,GO:0009653,GO:0009790,GO:0016023,GO:0016043,GO:0016049,GO:0030154,GO:0040007,GO:0050789			reproduction;signal transducer activity;receptor binding;extracellular region;plasma membrane;transcription;cytoskeleton organization and biogenesis;cell cycle;signal transduction;development;metabolism;cell death;cell proliferation;morphogenesis;embryoni
AAEL000600	Wnt10a protein, putative	D				GO:0000003,GO:0004871,GO:0005102,GO:0005576,GO:0005886,GO:0006350,GO:0007010,GO:0007049,GO:0007165,GO:0007275,GO:0008152,GO:0008219,GO:0008283,GO:0009653,GO:0009790,GO:0016023,GO:0016043,GO:0016049,GO:0030154,GO:0040007,GO:0050789	ENSANGP00000010105 [Anopheles gambiae str. PEST]	Wnt superfamily	reproduction;signal transducer activity;receptor binding;extracellular region;plasma membrane;transcription;cytoskeleton organization and biogenesis;cell cycle;signal transduction;development;metabolism;cell death;cell proliferation;morphogenesis;embryoni
AAEL000601	hypothetical protein	D					3-hydroxy-3-methylglutaryl-coenzyme A reductase [Roseovarius nubinhibens ISM]
AAEL000602	conserved hypothetical protein	D				GO:0004872,GO:0005623,GO:0007165	ENSANGP00000010254 [Anopheles gambiae str. PEST]	Lanthionine synthetase C-like	receptor activity;cell;signal transduction											-0.274976					-0.227923	0.1295	-0.118748
AAEL000603	conserved hypothetical protein	D				GO:0016740	ENSANGP00000019702 [Anopheles gambiae str. PEST]	Acyltransferase 3	transferase activity
AAEL000604	hypothetical protein	U					ENSANGP00000022666 [Anopheles gambiae str. PEST]													0.165516		-0.130746				0.276408	-0.373427
AAEL000605	rab geranylgeranyl transferase alpha subunit	D				GO:0005941,GO:0006412,GO:0006464,GO:0009653,GO:0016043,GO:0016740	ENSANGP00000010176 [Anopheles gambiae str. PEST]	Protein prenyltransferase, alpha subunit	unlocalized protein complex;protein biosynthesis;protein modification;morphogenesis;cell organization and biogenesis;transferase activity			-0.154156	0.0997206		-0.0418498	0.158626		0.217676	0.443275	-0.213254	-0.160789	-0.263844	0.154156		0.0346023		-0.10122
AAEL000606	hypothetical protein	U					hypothetical membrane protein [Candida albicans]
AAEL000607	hypothetical protein	U					MGC84212 protein [Xenopus laevis]																		0.359831
AAEL000608	conserved hypothetical protein	U					ENSANGP00000013882 [Anopheles gambiae str. PEST]									-0.188215	-0.158152		-0.273559	-0.164625				0.330497	0.253327
AAEL000609	conserved hypothetical protein	U					ENSANGP00000028555 [Anopheles gambiae str. PEST]
AAEL000610	hypothetical protein	D					PREDICTED: similar to myeloid ecotropic viral integration site-1 [Gallus gallus]						-0.350519	-0.269394	-0.383505		-0.375434	-0.173793	-0.146951		-0.733587	-0.406709		-0.520595	-0.808643	-0.364884	-0.592114
AAEL000611	antibacterial peptide, putative	I				GO:0005576,GO:0006961			extracellular region;antibacterial humoral response (sensu Protostomia)											4.71374
AAEL000612	hypothetical protein	U					CG15245-PA [Drosophila melanogaster]					-0.258852	-0.176521	-0.28891		-1.40452	-0.824202	0.315996	-0.384474								-0.329115
AAEL000613	Odorant receptor 83c, putative	CSR				GO:0004984,GO:0005549,GO:0007608,GO:0016020	ENSANGP00000024301 [Anopheles gambiae str. PEST]	Olfactory receptor, Drosophila	olfactory receptor activity;odorant binding;sensory perception of smell;membrane
AAEL000614	Odorant receptor 83c, putative	CSR				GO:0004984,GO:0005549,GO:0007608,GO:0016020	ENSANGP00000022702 [Anopheles gambiae str. PEST]	Olfactory receptor, Drosophila	olfactory receptor activity;odorant binding;sensory perception of smell;membrane
AAEL000615	hypothetical protein	U																		-0.273636	-1.8471	0.302659	-0.723474	-0.309607		-0.362161	-0.0557104
AAEL000616	odorant receptor	CSR				GO:0004984,GO:0005549,GO:0007608,GO:0016020	ENSANGP00000023921 [Anopheles gambiae str. PEST]	Olfactory receptor, Drosophila	olfactory receptor activity;odorant binding;sensory perception of smell;membrane
AAEL000617	carbonic anhydrase	M				GO:0003824,GO:0005488,GO:0008152	ENSANGP00000011908 [Anopheles gambiae str. PEST]	Glutelin;Carbonic anhydrase, eukaryotic	catalytic activity;binding;metabolism
AAEL000618	wingless protein, putative	D				GO:0004871,GO:0005102,GO:0005576,GO:0007165,GO:0007275	ENSANGP00000010191 [Anopheles gambiae str. PEST]	Secreted growth factor Wnt protein;Wnt superfamily	signal transducer activity;receptor binding;extracellular region;signal transduction;development
AAEL000619	conserved hypothetical protein	U					ENSANGP00000001833 [Anopheles gambiae str. PEST]					0.980121	-0.274145	0.514794	1.60222	0.159473	0.923956	0.210435	0.761319	1.36737	-0.175083	0.503431	1.81417	0.127876	0.664969	0.728955	0.833989
AAEL000620	hypothetical protein	U					Hypothetical protein CBG07844 [Caenorhabditis briggsae]					-0.301192	-0.254174	-0.34303	-0.679947	-0.244779	-0.229328	-0.352935	-0.548586	-0.523586	-0.0493694	-0.310116	0.301192			-0.759008	-0.673807
AAEL000621	antibacterial peptide, putative	I				GO:0005576,GO:0006961		Cecropin	extracellular region;antibacterial humoral response (sensu Protostomia)											2.78463
AAEL000622	conserved hypothetical protein	D					ENSANGP00000023761 [Anopheles gambiae str. PEST]	Tetratricopeptide TPR_1;Tetratricopeptide TPR_2;Tetratricopeptide region;Bipartite nuclear localization signal				0.16099	0.112333	0.0948078	0.281339	0.157739	0.457563	0.283893	-0.0857565	0.2081	0.120351	0.141015	-0.150077	0.078366	-0.0206459	0.219072	-0.236673
AAEL000623	conserved hypothetical protein	RTT				GO:0003677,GO:0003700,GO:0005634,GO:0006350,GO:0007275,GO:0008283,GO:0009607,GO:0009653,GO:0009790,GO:0016043,GO:0030154,GO:0050789	PREDICTED: similar to GA11505-PA [Apis mellifera]	Transcriptional regulator, GCM-like	DNA binding;transcription factor activity;nucleus;transcription;development;cell proliferation;response to biotic stimulus;morphogenesis;embryonic development;cell organization and biogenesis;cell differentiation;regulation of biological process
AAEL000624	rho-gap 92b	D				GO:0006810,GO:0015031,GO:0016043,GO:0030234,GO:0050789	ENSANGP00000010194 [Anopheles gambiae str. PEST]	RhoGAP	transport;protein transport;cell organization and biogenesis;enzyme regulator activity;regulation of biological process
AAEL000625	antibacterial peptide, putative	I				GO:0005576,GO:0006961			extracellular region;antibacterial humoral response (sensu Protostomia)											4.52876		2.36962
AAEL000626	hypothetical protein	U					hypothetical protein [Plasmodium chabaudi chabaudi]
AAEL000627	antibacterial peptide, putative	I				GO:0005576,GO:0006961	cecropin A [Aedes aegypti]		extracellular region;antibacterial humoral response (sensu Protostomia)
AAEL000628	Odorant receptor 83c, putative	CSR					ENSANGP00000022702 [Anopheles gambiae str. PEST]	Olfactory receptor, Drosophila
AAEL000629	adenylate kinase 3, putative	D				GO:0000166,GO:0005739,GO:0006139,GO:0009058,GO:0016301	ENSANGP00000010251 [Anopheles gambiae str. PEST]	Adenylate kinase;Shikimate kinase;Ras GTPase;Adenylate kinase, lid region	nucleotide binding;mitochondrion;nucleobase\, nucleoside\, nucleotide and nucleic acid metabolism;biosynthesis;kinase activity											-0.544484		0.272321		-0.237295	-0.231244	0.194594	0.275866
AAEL000630	cardioacceleratory peptide 2a, putative	D					ENSANGP00000010131 [Anopheles gambiae str. PEST]	Orphan nuclear receptor, NOR1 type
AAEL000631	conserved hypothetical protein	RTT				GO:0003677,GO:0003700,GO:0005634,GO:0006350,GO:0007275,GO:0008283,GO:0009790,GO:0030154,GO:0050789	ENSANGP00000029153 [Anopheles gambiae str. PEST]	Transcriptional regulator, GCM-like	DNA binding;transcription factor activity;nucleus;transcription;development;cell proliferation;embryonic development;cell differentiation;regulation of biological process
AAEL000632	WNT4 precursor, putative	D				GO:0004871,GO:0005102,GO:0005576,GO:0007165,GO:0007275			signal transducer activity;receptor binding;extracellular region;signal transduction;development
AAEL000633	toll	I	TOLL8	TOLL	TOLL	GO:0004672,GO:0004872,GO:0005623,GO:0005886,GO:0006464,GO:0007165,GO:0009607		Thiolase;Whey acidic protein, core region;Interleukin-1 receptor, type I/Toll precursor;Leucinech repeat;Toll-Interleukin receptor;Leucinech repeat, typical subtype	protein kinase activity;receptor activity;cell;plasma membrane;protein modification;signal transduction;response to biotic stimulus	Aaeg:N45874
AAEL000634	ceramide glucosyltransferase	M				GO:0005783,GO:0005794,GO:0008219,GO:0016740,GO:0050789	GA19592-PA [Drosophila pseudoobscura]	Glycosyl transferase, family 2	endoplasmic reticulum;Golgi apparatus;cell death;transferase activity;regulation of biological process											0.125031	0.262529			0.286004			0.107516
AAEL000635	cop9 complex subunit 7a	D				GO:0005634,GO:0008283,GO:0043234			nucleus			-0.19042	-0.00703382	0.040162	-0.100737	-0.204219	-0.148384	-0.101798	-0.127144	-0.184163	-0.157278	-0.0728889	-0.187265	-0.228913	-0.41762	-0.281973	-0.500658
AAEL000636	conserved hypothetical protein	D				GO:0005102,GO:0005198,GO:0007154,GO:0007165	CG6124-PA [Drosophila melanogaster]	EGF-like region;Protein of unknown function DUF139, cysteine rich;Proteinase inhibitor I15, antistasin;EGF-like	receptor binding;structural molecule activity;cell communication;signal transduction
AAEL000637	hypothetical protein	U					PREDICTED: hypothetical protein XP_795461 [Strongylocentrotus purpuratus]
AAEL000638	hypothetical protein	U					hypothetical protein Ecaj_0399 [Ehrlichia canis str. Jake]
AAEL000639	n-acetylgalactosaminyltransferase	M				GO:0005975,GO:0006412,GO:0006464,GO:0016740	ENSANGP00000015302 [Anopheles gambiae str. PEST]	Glycosyl transferase, family 2;Ricin B lectin	carbohydrate metabolism;protein biosynthesis;protein modification;transferase activity			-0.187111	-0.524685	-0.267098	-0.39814	-0.496858	-0.437531	-0.366951	-0.757682				0.187111
AAEL000640	alanine-glyoxylate aminotransferase	D				GO:0005488,GO:0006519,GO:0009058,GO:0016740	ENSANGP00000027287 [Anopheles gambiae str. PEST]	Aminotransferase class-III	binding												-0.259156		-0.538521		0.42832	-0.416336
AAEL000641	protein disulfide isomerase	D				GO:0003824,GO:0005489,GO:0005783,GO:0006118,GO:0006464,GO:0019538			catalytic activity			0.166602	0.106224	-0.591642				-0.352195		-0.117337	-0.259262	-1.18287	-0.166602	-0.693907	-0.331765	-0.338917	-0.253675
AAEL000642	alpha-amylase	DIG				GO:0005215,GO:0005975,GO:0016787	ENSANGP00000008953 [Anopheles gambiae str. PEST]	Alpha amylase, catalytic region	transporter activity;carbohydrate metabolism;hydrolase activity												0.105854	0.632957			0.277865		1.14287
AAEL000643	zinc finger protein	D				GO:0003676,GO:0005488,GO:0005634,GO:0006350,GO:0006950,GO:0007275,GO:0007582,GO:0008283,GO:0009628,GO:0009653,GO:0030528,GO:0050789	ENSANGP00000011193 [Anopheles gambiae str. PEST]	Zinc finger, C2H2-type;Zinc finger, C2H2-subtype	nucleic acid binding;binding;nucleus;transcription;response to stress;development;physiological process;cell proliferation;response to abiotic stimulus;morphogenesis;transcription regulator activity;regulation of biological process
AAEL000644	conserved hypothetical protein	D				GO:0016021	ENSANGP00000011660 [Anopheles gambiae str. PEST]	Mpv17/PMP22	integral to membrane
AAEL000645	hypothetical protein	U					ENSANGP00000011623 [Anopheles gambiae str. PEST]	DiGeorge syndrome critical 6											0.204837	-0.227125		-0.107558	-0.272082	0.167903	-0.138585	-0.234554	-0.310904
AAEL000646	n-acetylgalactosaminyltransferase	M				GO:0005975,GO:0006412,GO:0006464,GO:0016740	ENSANGP00000015302 [Anopheles gambiae str. PEST]	Glycosyl transferase, family 2;Ricin B lectin	carbohydrate metabolism;protein biosynthesis;protein modification;transferase activity
AAEL000647	predicted protein	DIG					ENSANGP00000008952 [Anopheles gambiae str. PEST]	Alpha amylase, catalytic region				-0.579581			-0.634812	-0.793052	-1.24565	-0.437955	-1.81967				0.567016
AAEL000648	hypothetical protein	D				GO:0003824,GO:0004871,GO:0005102,GO:0005488,GO:0005515,GO:0005622,GO:0005737,GO:0006139,GO:0006259,GO:0006350,GO:0006464,GO:0006810,GO:0007049,GO:0007165,GO:0007275,GO:0007582,GO:0008283,GO:0009653,GO:0016740,GO:0019538,GO:0043234,GO:0050789			catalytic activity;signal transducer activity;receptor binding;binding;protein binding;intracellular;cytoplasm;nucleobase\, nucleoside\, nucleotide and nucleic acid metabolism;DNA metabolism;transcription;protein modification;transport;cell cycle;signal t
AAEL000649	conserved hypothetical protein	U					ENSANGP00000026745 [Anopheles gambiae str. PEST]
AAEL000650	conserved hypothetical protein	D					ENSANGP00000012704 [Anopheles gambiae str. PEST]	Leucinech repeat;Nematode reverse transcriptase-like
AAEL000651	alpha-amylase	DIG				GO:0005215,GO:0005975,GO:0016787	ENSANGP00000015378 [Anopheles gambiae str. PEST]	Alpha amylase, catalytic region	transporter activity;carbohydrate metabolism;hydrolase activity
AAEL000652	gram-negative bacterial binding protein, putative	I	GNBPA2	BGBP	BGBP	GO:0004872,GO:0005488,GO:0005975,GO:0009607,GO:0016787	GA18590-PA [Drosophila pseudoobscura]		receptor activity;binding;carbohydrate metabolism;response to biotic stimulus;hydrolase activity	Aaeg:N45905
AAEL000653	zinc carboxypeptidase	PROT				GO:0008233,GO:0019538	ENSANGP00000007330 [Anopheles gambiae str. PEST]	Peptidase M14, carboxypeptidase A;Proteinase inhibitor, carboxypeptidase propeptide	peptidase activity;protein metabolism
AAEL000654	n-acetylgalactosaminyltransferase	M				GO:0005975,GO:0006412,GO:0006464,GO:0016740	ENSANGP00000011715 [Anopheles gambiae str. PEST]	Glycosyl transferase, family 2;Ricin B lectin	carbohydrate metabolism;protein biosynthesis;protein modification;transferase activity			0.222016	0.262536			0.304505		0.470123	0.219224				-0.222607
AAEL000655	conserved hypothetical protein	U					TPA_inf: HDC12925 [Drosophila melanogaster]
AAEL000656	pangolin	D				GO:0005654,GO:0006350,GO:0007165,GO:0009653,GO:0009790,GO:0030154,GO:0030528,GO:0043234,GO:0050789	ENSANGP00000011190 [Anopheles gambiae str. PEST]	HMG1/2 (high mobility group) box	nucleoplasm;transcription;signal transduction;morphogenesis;embryonic development;cell differentiation;transcription regulator activity;protein complex;regulation of biological process
AAEL000657	hypothetical protein	U																		-0.440153	0.0897591	-0.242003	-0.58622	-0.544159	-0.325523	-0.551188	-0.599459
AAEL000658	conserved hypothetical protein	U					ENSANGP00000011794 [Anopheles gambiae str. PEST]
AAEL000659	exosome complex exonuclease rrp43 (ribosomal RNA processing protein 43	D				GO:0000175,GO:0003723,GO:0006396	ENSANGP00000011759 [Anopheles gambiae str. PEST]	Exoribonuclease	3?ˉ-5?ˉ-exoribonuclease activity;RNA binding;RNA processing						-0.418216				-0.191065			-0.292964			-0.206292		-0.451821
AAEL000660	peptide methionine sulfoxide reductase, putative	D				GO:0003824,GO:0006464,GO:0006519,GO:0006950,GO:0007275,GO:0008219,GO:0009607	ENSANGP00000011685 [Anopheles gambiae str. PEST]	Methionine sulfoxide reductase A	catalytic activity;protein modification;amino acid and derivative metabolism;response to stress;development;cell death;response to biotic stimulus											-0.295228						-0.137957
AAEL000661	t-cell specific transcription factor, tcf	D				GO:0005654,GO:0006350,GO:0007165,GO:0009653,GO:0009790,GO:0030154,GO:0030528,GO:0043234,GO:0050789	ENSANGP00000011187 [Anopheles gambiae str. PEST]	Pollen allergen Poa pIX/Phl pVI, C-terminal;HMG1/2 (high mobility group) box	nucleoplasm;transcription;signal transduction;morphogenesis;embryonic development;cell differentiation;transcription regulator activity;protein complex;regulation of biological process
AAEL000662	conserved hypothetical protein	U					GA11086-PA [Drosophila pseudoobscura]
AAEL000663	conserved hypothetical protein	U					ENSANGP00000011680 [Anopheles gambiae str. PEST]										-0.16222							0.144801	0.375915		0.438265
AAEL000664	hypothetical protein	U
AAEL000665	adult cuticle protein, putative	CS				GO:0042302	ENSANGP00000025539 [Anopheles gambiae str. PEST]	Insect cuticle protein	structural constituent of cuticle
AAEL000666	pmp22 peroxisomal membrane protein, putative	D				GO:0004871,GO:0005623,GO:0005777			signal transducer activity
AAEL000667	alpha-amylase	DIG				GO:0005975,GO:0016787			carbohydrate metabolism			-0.249957	1.0329	0.34331	0.335036	0.327519	-0.476323	0.621842	0.125952	0.745385	0.397153	-0.233221	0.249957		0.784539		1.16263
AAEL000668	conserved hypothetical protein	D					leucine rich protein [Aedes albopictus]	Leucinech repeat												-0.897847	0.22608				-0.594862	-1.22989
AAEL000669	conserved hypothetical protein	U					ENSANGP00000011794 [Anopheles gambiae str. PEST]
AAEL000670	methionine sulfoxide reductase	D				GO:0003824,GO:0006464,GO:0006519,GO:0006950,GO:0007275,GO:0008219,GO:0009607	ENSANGP00000011685 [Anopheles gambiae str. PEST]	Methionine sulfoxide reductase A	catalytic activity;protein modification;amino acid and derivative metabolism;response to stress;development;cell death;response to biotic stimulus			0.573563	0.346816	1.23237		1.34688	0.793054	1.11889	0.853853	-1	-0.720863	1.52188	-0.447779	1.21293	0.127648	0.814175	1.58918
AAEL000671	toll	I				GO:0004872,GO:0005515,GO:0005623,GO:0005886,GO:0006950,GO:0007165,GO:0007275,GO:0007582,GO:0008283,GO:0009607,GO:0009790,GO:0019748,GO:0030154,GO:0050789	ENSANGP00000008963 [Anopheles gambiae str. PEST]	Whey acidic protein, core region;Interleukin-1 receptor, type I/Toll precursor;Leucinech repeat;Toll-Interleukin receptor;Leucinech repeat, typical subtype	receptor activity;protein binding;cell;plasma membrane;response to stress;signal transduction;development;physiological process;cell proliferation;response to biotic stimulus;embryonic development;secondary metabolism;cell differentiation;regulation of bi
AAEL000672	cyclin a	D				GO:0005634,GO:0005737,GO:0007049,GO:0007275,GO:0007582,GO:0009790,GO:0030234,GO:0043226,GO:0043234,GO:0050789	ENSANGP00000028778 [Anopheles gambiae str. PEST]	Cyclin, N-terminal;Somatotropin hormone;Cyclin, C-terminal	nucleus;cytoplasm;cell cycle;development;physiological process;embryonic development;enzyme regulator activity;organelle;protein complex;regulation of biological process											0.430259	0.288623			0.233892		0.323828
AAEL000673	conserved hypothetical protein	D				GO:0005554	ENSANGP00000015295 [Anopheles gambiae str. PEST]	Protein of unknown function UPF0031	molecular function unknown			0.212297	0.185223	0.101601	0.297426		0.0476488	0.100281		-0.187257			0.240337		0.0581936	0.477479
AAEL000674	RNA m5u methyltransferase	RTT				GO:0003723,GO:0006139,GO:0016740	ENSANGP00000011586 [Anopheles gambiae str. PEST]	(Uracil-5)-methyltransferase;SAM (and some other nucleotide) binding motif	RNA binding;nucleobase\, nucleoside\, nucleotide and nucleic acid metabolism;transferase activity
AAEL000675	hypothetical protein	U										-0.0348053	-0.13227		0.626097	0.43622							0.0348053
AAEL000676	hypothetical protein	D					PREDICTED: similar to glutamyl-prolyl tRNA synthetase isoform 5 [Canis familiaris]
AAEL000677	DNA-directed RNA polymerase subunit rpb8	RTT				GO:0003676,GO:0005654,GO:0006350,GO:0016740,GO:0043234	ENSANGP00000011232 [Anopheles gambiae str. PEST]	RNA polymerase Rpb8	nucleic acid binding;nucleoplasm;transcription;transferase activity;protein complex
AAEL000678	alpha-amylase	DIG				GO:0005215,GO:0005975,GO:0016787	ENSANGP00000008952 [Anopheles gambiae str. PEST]	Alpha amylase, catalytic region	transporter activity;carbohydrate metabolism;hydrolase activity						0.401103	-0.603795		-0.69076
AAEL000679	NEDD8, putative	D				GO:0006464	ENSANGP00000010151 [Anopheles gambiae str. PEST]	Ubiquitin	protein modification			-0.902859	0.0699387	-0.464345	-0.163714	-0.475458		-0.283572	-0.377088	-0.797913	-0.692802	-0.455002	-0.214707	-0.58936	-0.390453	-0.414076	-0.464672
AAEL000680	hypothetical protein	D					47 kDa protein [Rickettsia typhi]
AAEL000681	hypothetical protein	U					PREDICTED: hypothetical protein XP_936448 isoform 5 [Homo sapiens]
AAEL000682	hypothetical protein	U					CG10600-PA [Drosophila melanogaster]						-0.315734	-0.433225	-0.408094	-0.460824	-0.371986	-0.334667	-0.0799996
AAEL000683	conserved hypothetical protein	U					ENSANGP00000010000 [Anopheles gambiae str. PEST]						-0.234966			-0.22896	-0.349872		-0.414909
AAEL000684	conserved hypothetical protein	D					ENSANGP00000010949 [Anopheles gambiae str. PEST]	Retrotransposon gag protein
AAEL000685	conserved hypothetical protein	U					ENSANGP00000009990 [Anopheles gambiae str. PEST]													0.22528		-0.123162				0.290397	0.145648
AAEL000686	lipase	M				GO:0003824,GO:0006629	putative salivary lipase [Culex pipiens quinquefasciatus]	Lipase, active site;Lipase;Esterase/lipase/thioesterase	catalytic activity;lipid metabolism
AAEL000687	glucosyl/glucuronosyl transferases	M				GO:0005975,GO:0006629,GO:0009607,GO:0009628,GO:0016740	ENSANGP00000010111 [Anopheles gambiae str. PEST]	UDP-glucuronosyl/UDP-glucosyltransferase	carbohydrate metabolism;lipid metabolism;response to biotic stimulus;response to abiotic stimulus;transferase activity			-0.737424	0.479981	0.18424	0.256374	1.28754	-0.132408	0.312602	0.945972				0.650292
AAEL000688	hyperpolarization activated cyclic nucleotide-gated potassium channel	TRP					ENSANGP00000006499 [Anopheles gambiae str. PEST]	Cyclic nucleotide-binding;cAMP-dependent protein kinase
AAEL000689	steroid dehydrogenase	M				GO:0003824,GO:0006629	ENSANGP00000013086 [Anopheles gambiae str. PEST]	Short-chain dehydrogenase/reductase SDR;Glucose/ribitol dehydrogenase;2,3-dihydro-2,3-dihydroxybenzoate dehydrogenase;Insect alcohol dehydrogenase family	catalytic activity;lipid metabolism													-0.427631
AAEL000690	steroid dehydrogenase	M				GO:0003824,GO:0006629	ENSANGP00000027184 [Anopheles gambiae str. PEST]	Short-chain dehydrogenase/reductase SDR;Glucose/ribitol dehydrogenase;2,3-dihydro-2,3-dihydroxybenzoate dehydrogenase;Insect alcohol dehydrogenase family	catalytic activity;lipid metabolism
AAEL000691	conserved hypothetical protein	D				GO:0003723,GO:0006139,GO:0019538	testis-specific RNP-type RNA binding protein [Drosophila melanogaster]	Paraneoplastic encephalomyelitis antigen;RNA-binding region RNP-1 (RNA recognition motif)	RNA binding;nucleobase\, nucleoside\, nucleotide and nucleic acid metabolism;protein metabolism
AAEL000692	partner of sld5	D					ENSANGP00000018994 [Anopheles gambiae str. PEST]	GINS complex, Psf1 component
AAEL000693	fkbppamycin associated protein	M				GO:0004672,GO:0006412,GO:0007154,GO:0007165,GO:0007275,GO:0007582,GO:0008152,GO:0009605,GO:0009628,GO:0009653,GO:0016043,GO:0016049,GO:0016265,GO:0019538,GO:0040007,GO:0050789	target of rapamycin [Aedes aegypti]	Phosphatidylinositol 3- and 4-kinase, catalytic;HEAT;PIKlated kinase, FAT;PIKlated kinase, FATC	protein kinase activity;protein biosynthesis;cell communication;signal transduction;development;physiological process;metabolism;response to external stimulus;response to abiotic stimulus;morphogenesis;cell organization and biogenesis;cell growth;death;pr
AAEL000694	conserved hypothetical protein	U					GA12668-PA [Drosophila pseudoobscura]
AAEL000695	conserved hypothetical protein	D				GO:0000003,GO:0003723,GO:0005515,GO:0005634,GO:0006139,GO:0006412,GO:0007582,GO:0030154,GO:0050789	ENSANGP00000005501 [Anopheles gambiae str. PEST]	Paraneoplastic encephalomyelitis antigen;Antifreeze protein, type I;RNA-binding region RNP-1 (RNA recognition motif)	reproduction;RNA binding;protein binding;nucleus;nucleobase\, nucleoside\, nucleotide and nucleic acid metabolism;protein biosynthesis;physiological process;cell differentiation;regulation of biological process
AAEL000696	hypothetical protein	D				GO:0003676,GO:0005634,GO:0008270	GA22134-PA [Drosophila pseudoobscura]		nucleic acid binding;nucleus;zinc ion binding
AAEL000697	hypothetical protein	U					ENSANGP00000010207 [Anopheles gambiae str. PEST]
AAEL000698	conserved hypothetical protein	D				GO:0005622,GO:0008270	PREDICTED: similar to tripartite motif protein 33, partial [Strongylocentrotus purpuratus]		intracellular;zinc ion binding
AAEL000699	conserved hypothetical protein	D					GA17939-PA [Drosophila pseudoobscura]	Zinc finger, C2H2-type					0.313419		-0.185646					-0.139955	0.273251	-0.391584			-0.147587	-0.184264	-0.425836
AAEL000700	cadherin	CS				GO:0004871,GO:0004872,GO:0005509,GO:0005515,GO:0005623,GO:0005886,GO:0006464,GO:0007165,GO:0007275,GO:0008283,GO:0009653,GO:0016043,GO:0030154	ENSANGP00000009993 [Anopheles gambiae str. PEST]	Cadherin;Cadherin cytoplasmic region	signal transducer activity;receptor activity;calcium ion binding;protein binding;cell;plasma membrane;protein modification;signal transduction;development;cell proliferation;morphogenesis;cell organization and biogenesis;cell differentiation
AAEL000701	50S ribosomal protein L4	RTT				GO:0003676,GO:0005198,GO:0005739,GO:0005840,GO:0006412	ENSANGP00000007187 [Anopheles gambiae str. PEST]	Ribosomal protein L4/L1e	nucleic acid binding;structural molecule activity;mitochondrion;ribosome;protein biosynthesis			0.0492632	0.609257	0.608603		0.220013	0.0867997	0.400548	0.395523	-0.197263		-0.146641	-0.0492632	-0.13954	-0.1912	-0.0896056	-0.471699
AAEL000702	hypothetical protein	U					ENSANGP00000023903 [Anopheles gambiae str. PEST]
AAEL000703	glycogen phosphorylase	D				GO:0005975,GO:0006091,GO:0016740	ENSANGP00000010081 [Anopheles gambiae str. PEST]	Glycosyl transferase, family 35	carbohydrate metabolism;generation of precursor metabolites and energy;transferase activity				0.301786		-0.152294	-0.315928	0.304996	0.135519	0.175663	0.276368	-0.181078	0.668832		0.187365	0.418272	0.218374	0.483228
AAEL000704	synaptotagmin, putative	D				GO:0000003,GO:0005215,GO:0005509,GO:0005515,GO:0005623,GO:0006810,GO:0007267,GO:0007582,GO:0007610,GO:0008289,GO:0015031,GO:0016023,GO:0016043,GO:0030154,GO:0050789	ENSANGP00000010096 [Anopheles gambiae str. PEST]	Synaptotagmin;C2;A-latrotoxin receptor interaction	reproduction;transporter activity;calcium ion binding;protein binding;cell;transport;cell-cell signaling;physiological process;behavior;lipid binding;protein transport;cytoplasmic membrane-bound vesicle;cell organization and biogenesis;cell differentiatio
AAEL000705	steroid dehydrogenase	M				GO:0003824,GO:0006629	ENSANGP00000013086 [Anopheles gambiae str. PEST]	Short-chain dehydrogenase/reductase SDR;Glucose/ribitol dehydrogenase;2,3-dihydro-2,3-dihydroxybenzoate dehydrogenase;Insect alcohol dehydrogenase family	catalytic activity;lipid metabolism
AAEL000706	serine palmitoyltransferase	M				GO:0006629,GO:0009058,GO:0016740	ENSANGP00000010113 [Anopheles gambiae str. PEST]	Aminotransferase, class-II;Aminotransferase, class I and II;SKP1 component	lipid metabolism;biosynthesis;transferase activity			0.151117	0.240627	-0.459661	0.242479	0.144387	0.487408		-0.147094	-0.20931	-0.153081	-0.838573	-0.046972	0.258476	0.269779	-0.540418	-0.534189
AAEL000707	cell cycle control protein cwf22	D				GO:0003723,GO:0006412	ENSANGP00000007281 [Anopheles gambiae str. PEST]	Initiation factor eIF-4 gamma, middle;Initiation factor eIF-4 gamma, MA3	RNA binding;protein biosynthesis			-0.132299	0.148616	-0.211394	0.238672			0.211752	-0.1322	0.0986779	0.100454	-0.238629	0.132299	-0.155406		0.24697	-0.279363
AAEL000708	hiv-1 rev binding protein	D				GO:0003723,GO:0005654,GO:0005730,GO:0006139,GO:0006996,GO:0007028	ENSANGP00000010161 [Anopheles gambiae str. PEST]	KH, type 1	RNA binding;nucleoplasm;nucleolus;nucleobase\, nucleoside\, nucleotide and nucleic acid metabolism;organelle organization and biogenesis;cytoplasm organization and biogenesis			0.0776109	0.507982		-0.342624		-0.519633		-0.17247	0.182434	0.524482	-0.189404	-0.0776109	0.0974213	-0.156353		-0.224358
AAEL000709	developmental protein cactus	I	CACT	TOLLPATH	CACT		ENSANGP00000010014 [Anopheles gambiae str. PEST]	Ankyrin		Aaeg:N47215		0.344426	-0.341066	-0.190533	-0.271367	0.279467	0.222965	0.450307	0.413061	0.373136	0.0618781	0.0576748	-0.254885	0.136357	0.180405	0.489355	0.265329
AAEL000710	conserved hypothetical protein	U					Hypothetical protein CBG06427 [Caenorhabditis briggsae]
AAEL000711	hypothetical protein	U										-0.207515	0.410283	0.30682	-0.112106	0.0945776	-0.0316378			-0.328993	0.00121023	0.504553	0.41509	0.344501		-0.233904	0.748648
AAEL000712	hypothetical protein	D				GO:0003676,GO:0005488,GO:0005634,GO:0008233,GO:0019538	ENSANGP00000015917 [Anopheles gambiae str. PEST]	Zinc finger, C2H2-type	nucleic acid binding;binding;nucleus;peptidase activity;protein metabolism
AAEL000713	reticulon/nogo	D				GO:0004871,GO:0005509,GO:0005783,GO:0015031,GO:0016043	ENSANGP00000024478 [Anopheles gambiae str. PEST]	Bacterial rhodopsin;Reticulon	signal transducer activity;calcium ion binding;endoplasmic reticulum;protein transport;cell organization and biogenesis			-0.0464573	0.249405	-0.10854	0.318571	0.264327	0.475678	0.334616	-0.338745	-0.264862		0.0709904	0.369653			-0.224895	0.124726
AAEL000714	sodium-dependent excitatory amino acid transporter	TRP				GO:0005215,GO:0005886,GO:0006519,GO:0006810,GO:0006811	ENSANGP00000027123 [Anopheles gambiae str. PEST]	Hemopexin;Sodium:dicarboxylate symporter	transporter activity;plasma membrane;amino acid and derivative metabolism;transport;ion transport
AAEL000715	zinc finger protein	D				GO:0003676,GO:0005634,GO:0008270	ENSANGP00000011210 [Anopheles gambiae str. PEST]	Zinc finger, C2H2-type;Zinc finger, C2H2-subtype	nucleic acid binding;nucleus;zinc ion binding
AAEL000716	chondroitin 4-sulfotransferase	D				GO:0016740	ENSANGP00000013037 [Anopheles gambiae str. PEST]	Chondroitin 4-O-sulfotransferase	transferase activity			0.665635	0.454611	0.142328			0.481691	0.379139		0.279977							0.201141
AAEL000717	protocadherin	CS				GO:0004871,GO:0004872,GO:0005509,GO:0005515,GO:0005623,GO:0005886,GO:0006464,GO:0007165,GO:0007275,GO:0008283,GO:0009653,GO:0016043,GO:0030154	ENSANGP00000029455 [Anopheles gambiae str. PEST]	EGF-like region;Cadherin;EGF-like, laminin;GPCR, family 2, secretin-like;EGF-like, type 2;EGF-like;Laminin G, subdomain 1;Laminin G, subdomain 2;Hormone receptor, extracellular;GPS;Laminin G;EGF-like, type 3	signal transducer activity;receptor activity;calcium ion binding;protein binding;cell;plasma membrane;protein modification;signal transduction;development;cell proliferation;morphogenesis;cell organization and biogenesis;cell differentiation
AAEL000718	virus-induced RNA, putative	D					ENSANGP00000023903 [Anopheles gambiae str. PEST]	Antifreeze protein, type I												-0.540158	-0.431843	0.160763		-0.317084	-0.343158	-0.369534
AAEL000719	pak-interacting exchange factor, beta-pix/cool-1	D				GO:0007267,GO:0007582,GO:0030234	ENSANGP00000007278 [Anopheles gambiae str. PEST]	Src homology-3;Variant SH3;DH;Pleckstrin-like	cell-cell signaling;physiological process;enzyme regulator activity				0.58735				0.922698				0.697207	0.195007		0.401277	0.650229	0.391159
AAEL000720	conserved hypothetical protein	D				GO:0005654,GO:0030528,GO:0043234	ENSANGP00000010012 [Anopheles gambiae str. PEST]		nucleoplasm;transcription regulator activity;protein complex
AAEL000721	hypothetical protein	U					LD20870p [Drosophila melanogaster]
AAEL000722	conserved hypothetical protein	U
AAEL000723	hypothetical protein	U					CG31036-PA [Drosophila melanogaster]
AAEL000724	conserved hypothetical protein	D				GO:0003723,GO:0005635,GO:0015031,GO:0016043			RNA binding
AAEL000725	conserved hypothetical protein	D				GO:0005515,GO:0008270	GA14623-PA [Drosophila pseudoobscura]		protein binding;zinc ion binding
AAEL000726	fibrinogen and fibronectin	I	none	FREP	FREP			Fibrinogen, alpha/beta/gamma chain, C-terminal globular		Aaeg:N48215										-0.394995	-0.340597	-0.995856		-0.584996	-1.17672	-0.279889	1.05617
AAEL000727	hypothetical protein	U					PAN domain protein [Cryptosporidium parvum]
AAEL000728	ribosomal protein S6 kinase	RTT				GO:0000166,GO:0004672,GO:0004871,GO:0005840,GO:0006464,GO:0007049,GO:0007165,GO:0007610	S6 kinase [Aedes aegypti]	Protein kinase;Serine/threonine protein kinase, active site;Tyrosine protein kinase;Protein kinase, C-terminal	nucleotide binding;protein kinase activity;signal transducer activity;ribosome;protein modification;cell cycle;signal transduction;behavior			0.607229	-1.08679	0.575948	0.394788		0.33913	0.547448	-0.178157	0.391816	-0.957544			0.14016	-0.0531457	0.485515	-0.254151
AAEL000729	hypothetical protein	D				GO:0003723	CG32169-PA [Drosophila melanogaster]		RNA binding
AAEL000730	conserved hypothetical protein	D				GO:0003824,GO:0005198,GO:0005488,GO:0005622,GO:0006464,GO:0007010,GO:0043234	ENSANGP00000022800 [Anopheles gambiae str. PEST]	Zinc finger, RING-type	catalytic activity;structural molecule activity;binding;intracellular;protein modification;cytoskeleton organization and biogenesis;protein complex
AAEL000731	hypothetical protein	U											0.0478801	-0.109726		0.471288	0.818741		0.169098	-0.3649	0.337488	-0.169545	-0.315128	0.320365	0.347795	0.374536	-0.371065
AAEL000732	conserved hypothetical protein	U
AAEL000733	hydroxysteroid dehydrogenase	M				GO:0003824,GO:0006629,GO:0009058			catalytic activity													-0.223839
AAEL000734	hypothetical protein	U					ENSANGP00000009455 [Anopheles gambiae str. PEST]	Src homology-3;Neutrophil cytosol factor 2;DH;Variant SH3
AAEL000735	acyl-CoA oxidase	M				GO:0003824,GO:0005777,GO:0006629	ENSANGP00000020118 [Anopheles gambiae str. PEST]	Aminoacyl-tRNA synthetase, class I;Acyl-CoA dehydrogenase, central region;Acyl-CoA oxidase, C-terminal	catalytic activity;peroxisome;lipid metabolism
AAEL000736	conserved hypothetical protein	D					ENSANGP00000026662 [Anopheles gambiae str. PEST]	EGF-like region;Nematode-specific EB region
AAEL000737	rab6 gtpase activating protein, gapcena (rabgap1 protein)	D				GO:0006810,GO:0007049,GO:0007582,GO:0030234	ENSANGP00000017932 [Anopheles gambiae str. PEST]	RabGAP/TBC;Phosphotyrosine interaction region	transport											0.454411					0.224375	-0.600194
AAEL000738	conserved hypothetical protein (Rogdi leucine zipper containing protein)	D				GO:0007610,GO:0009628	ENSANGP00000011323 [Anopheles gambiae str. PEST]		behavior;response to abiotic stimulus
AAEL000739	hypothetical protein	U					ENSANGP00000021115 [Anopheles gambiae str. PEST]													0.606283	0.421354	0.228161		0.344687	0.240474	0.453319
AAEL000740	conserved hypothetical protein	U										0.552714	0.55846	0.685137	0.746696	0.319594	1.21998	0.273472	0.644824	0.25325	0.179561	0.319279	0.454756		0.401589	0.14849	0.20885
AAEL000741	ecdysone-induced protein 74EF (ETS transcription factor E74A)	D				GO:0000003,GO:0003700,GO:0005634,GO:0006350,GO:0007275,GO:0007582,GO:0008219,GO:0030528,GO:0050789	ETS transcription factor E74B [Aedes aegypti]	Ets;5-Hydroxytryptamine 2C receptor;HSF/ETS, DNA-binding	reproduction;transcription factor activity;nucleus;transcription;development;physiological process;cell death;transcription regulator activity;regulation of biological process			-0.387311	-0.309338		-0.178281				-0.68769		-0.179842		0.366287	0.212329		-0.0906294	-0.226017
AAEL000742	conserved hypothetical protein	D				GO:0005515,GO:0005623,GO:0009653	ENSANGP00000020384 [Anopheles gambiae str. PEST]	Low density lipoproteinceptor, class A	protein binding;cell;morphogenesis
AAEL000743	ribosomal protein S6 kinase	RTT				GO:0000003,GO:0000166,GO:0004672,GO:0004871,GO:0005840,GO:0006464,GO:0007010,GO:0007049,GO:0007154,GO:0007165,GO:0007275,GO:0007582,GO:0009605,GO:0009628,GO:0009653,GO:0016043,GO:0016049,GO:0016265,GO:0040007,GO:0050789	S6 kinase [Aedes aegypti]	Protein kinase;Serine/threonine protein kinase, active site;Tyrosine protein kinase;Protein kinase, C-terminal	reproduction;nucleotide binding;protein kinase activity;signal transducer activity;ribosome;protein modification;cytoskeleton organization and biogenesis;cell cycle;cell communication;signal transduction;development;physiological process;response to exter
AAEL000744	troponin C	D				GO:0005509,GO:0005515,GO:0005623,GO:0007165,GO:0007582	ENSANGP00000018434 [Anopheles gambiae str. PEST]	Calcium-binding EF-hand;Flagellar calcium-binding protein (calflagin)	calcium ion binding;protein binding;cell;signal transduction;physiological process			-0.491648	-0.294391	0.28153	-0.622652	-0.241049		-0.193753		-0.640103	0.635052	0.246934	-0.0774353	-0.307751	-0.418125	-0.617697
AAEL000745	hypothetical protein	U					secreted protein [Ciona intestinalis]					-0.251043	-0.368693		-0.397438	-0.480748		-0.200878	-1.20149		-0.294302	-0.250991	0.251043	-0.184371	-0.216404	-0.322393
AAEL000746	nadp-specific isocitrate dehydrogenase	M				GO:0003824,GO:0005739,GO:0005975,GO:0006091,GO:0009056	ENSANGP00000020939 [Anopheles gambiae str. PEST]	Isocitrate/isopropylmalate dehydrogenase	catalytic activity;mitochondrion;carbohydrate metabolism;generation of precursor metabolites and energy;catabolism					-0.786011		-0.391974	-0.482867	-1.74615	-1.17937	0.416664		-0.68012		-0.225199	0.23121		-0.577864
AAEL000747	conserved hypothetical protein	U					ENSANGP00000009512 [Anopheles gambiae str. PEST]														0.228406	0.547594		0.306483		0.327301
AAEL000748	conserved hypothetical protein	U
AAEL000749	conserved hypothetical protein	I	none	FREP	FREP			Fibrinogen, alpha/beta/gamma chain, C-terminal globular		Aaeg:N15142										0.158666	0.203201	0.532011		-0.120961	-0.252612	-0.302015	-0.287595
AAEL000750	hypothetical protein	U					monkey-king [Drosophila simulans]	PAP/25A core						0.130606			0.190363								-0.225537		-0.881916
AAEL000751	Na/Ca exchanger	TRP				GO:0016021	ENSANGP00000017852 [Anopheles gambiae str. PEST]	Sodium/calcium exchanger membrane region	integral to membrane
AAEL000752	conserved hypothetical protein	D				GO:0004222,GO:0005578,GO:0006508	ENSANGP00000012651 [Anopheles gambiae str. PEST]		metalloendopeptidase activity			0.179844	-0.879143	-0.618717	-0.188578	-0.999751	-0.838161	-1.11698	-0.167072	-0.272223	-1.1047	-0.306246	-0.0852114	-0.0932027	-0.178434	-0.430356	-0.184399
AAEL000753	conserved hypothetical protein	D				GO:0003676,GO:0005634,GO:0008270	ENSANGP00000014261 [Anopheles gambiae str. PEST]	Zinc finger, C2H2-type	nucleic acid binding;nucleus;zinc ion binding															0.347687
AAEL000754	conserved hypothetical protein	U
AAEL000755	conserved hypothetical protein	D					ENSANGP00000021276 [Anopheles gambiae str. PEST]	Zinc finger, HIT-type				-0.598427	-0.407364	-0.141693		-0.292714			-0.420222	0.196508	-0.134058		0.598427				-0.349716
AAEL000756	hypothetical protein	D					COG3210: Large exoproteins involved in heme utilization or adhesion [Haemophilus somnus 2336]
AAEL000757	anterior fat body protein	D				GO:0007165,GO:0007275	ENSANGP00000010255 [Anopheles gambiae str. PEST]	Senescence marker protein-30 (SMP-30);Regucalcin	signal transduction
AAEL000758	ubiquitin-activating enzyme E1	D				GO:0003824,GO:0006464,GO:0019538	ENSANGP00000025488 [Anopheles gambiae str. PEST]	Ubiquitin-activating enzyme, E1;UBA/THIF-type NAD/FAD binding fold;Ubiquitin-activating enzyme repeat;NAD-binding site	catalytic activity				-0.753303	-0.356786	0.0728857	-0.329183	-0.163137	-0.691777	-0.27563	-0.283712	-0.714908	-0.535233	-0.437657	-0.637362	-0.530364	-0.918767	-0.744439
AAEL000759	gamma-glutamylcysteine synthetase, putative	D				GO:0003824,GO:0005515,GO:0005737,GO:0007610,GO:0009058,GO:0009628,GO:0030234,GO:0043234,GO:0050789	ENSANGP00000015640 [Anopheles gambiae str. PEST]		catalytic activity;protein binding;cytoplasm;behavior;biosynthesis;response to abiotic stimulus;enzyme regulator activity;protein complex;regulation of biological process
AAEL000760	serine protease	I	none	CLIP	CLIP-SP	GO:0003677,GO:0003700,GO:0005634,GO:0006350,GO:0008233,GO:0009607,GO:0019538,GO:0030234,GO:0050789	GA15903-PA [Drosophila pseudoobscura]	Peptidase S1 and S6, chymotrypsin/Hap;Peptidase S1A, chymotrypsin	DNA binding;transcription factor activity;nucleus;transcription;peptidase activity;response to biotic stimulus;protein metabolism;enzyme regulator activity;regulation of biological process	Aaeg:N49289										-0.503677	-0.221231	-0.830671		-0.17418	-0.409847	-0.276856	-0.592513
AAEL000761	hypothetical protein	D				GO:0003676,GO:0005634,GO:0008270			nucleic acid binding;nucleus;zinc ion binding			0.126177	-0.391119	-0.0882406	0.172051	-0.3075	0.118824		0.0114867	0.626953	-0.510583		-0.126177		0.49672
AAEL000762	lumican, putative	D					ENSANGP00000012704 [Anopheles gambiae str. PEST]	Leucinech repeat
AAEL000763	Plenty of SH3s, putative	D				GO:0000003,GO:0003824,GO:0004871,GO:0005198,GO:0005488,GO:0005622,GO:0006464,GO:0007010,GO:0007275,GO:0007582,GO:0009653,GO:0016043,GO:0016265,GO:0030154,GO:0043234	ENSANGP00000004820 [Anopheles gambiae str. PEST]	Src homology-3;Neutrophil cytosol factor 2;Variant SH3	reproduction;catalytic activity;signal transducer activity;structural molecule activity;binding;intracellular;protein modification;cytoskeleton organization and biogenesis;development;physiological process;morphogenesis;cell organization and biogenesis;de															0.392485		0.160393
AAEL000764	hypothetical protein	D				GO:0005515,GO:0006355,GO:0008270	ENSANGP00000026480 [Anopheles gambiae str. PEST]	Zinc finger, PHD-type	protein binding;regulation of transcription\, DNA-dependent;zinc ion binding
AAEL000765	hexamerin 2 beta	I				GO:0005215,GO:0005576,GO:0005615,GO:0006810,GO:0043234,GO:0045735	ENSANGP00000016795 [Anopheles gambiae str. PEST]	Arthropod hemocyanin/insect LSP;Hemocyanin, N-terminal;Hemocyanin, C-terminal	transporter activity;extracellular region;;transport;protein complex;nutrient reservoir activity
AAEL000766	ubiquinol cytochrome C oxidoreductase-subunit 6.4kD-subunit, putative	D					similar to Drosophila melanogaster CG14482 [Drosophila yakuba]					-0.233439			-0.376463		-0.0685844	-0.159812	0.0574796	0.44863		0.898384	0.233439	0.157507	0.308502	0.217144	0.900413
AAEL000767	phospholipid-transporting atpase 1 (aminophospholipid flippase 1)	TRP				GO:0000166,GO:0005215,GO:0005623,GO:0006629,GO:0006810,GO:0006811,GO:0016787	ENSANGP00000004833 [Anopheles gambiae str. PEST]	ATPase, E1-E2 type;Haloacid dehalogenase-like hydrolase	nucleotide binding
AAEL000768	conserved hypothetical protein	D				GO:0003676,GO:0005634,GO:0008270	PREDICTED: similar to zinc finger protein 643 [Canis familiaris]	Zinc finger, C2H2-type;Peptidase M, neutral zinc metallopeptidases, zinc-binding site;Zinc finger, C2H2-subtype	nucleic acid binding;nucleus;zinc ion binding
AAEL000769	arginine/serinech splicing factor	RTT				GO:0003676	SRp55 [Drosophila melanogaster]	RNA-binding region RNP-1 (RNA recognition motif)	nucleic acid binding											1.84973		2.29338		2.32501	1.9718	1.54071	1.90142
AAEL000770	platelet-activating factor acetylhydrolase isoform 1b alpha subunit	D				GO:0000003,GO:0005198,GO:0005515,GO:0005856,GO:0006810,GO:0006996,GO:0007010,GO:0007049,GO:0007275,GO:0007582,GO:0009653,GO:0016043,GO:0016787,GO:0030154,GO:0030234,GO:0043234,GO:0050789	ENSANGP00000021164 [Anopheles gambiae str. PEST]	WD-40 repeat;Lissencephaly type-1-like homology motif	reproduction;structural molecule activity;protein binding;cytoskeleton;transport;organelle organization and biogenesis;cytoskeleton organization and biogenesis;cell cycle;development;physiological process;morphogenesis;cell organization and biogenesis;hyd															0.103659	-0.164651		-0.144289
AAEL000771	hypothetical protein	U					ENSANGP00000028463 [Anopheles gambiae str. PEST]
AAEL000772	conserved hypothetical protein	D				GO:0003676	ENSANGP00000021033 [Anopheles gambiae str. PEST]		nucleic acid binding
AAEL000773	kinesin heavy chain	CS				GO:0000166,GO:0003774,GO:0004871,GO:0005198,GO:0005856,GO:0005886,GO:0006810,GO:0007010,GO:0007165,GO:0015031,GO:0016043,GO:0043234	ENSANGP00000021149 [Anopheles gambiae str. PEST]	Kinesin, motor region	nucleotide binding;motor activity;signal transducer activity;structural molecule activity;cytoskeleton;plasma membrane;transport;cytoskeleton organization and biogenesis;signal transduction;protein transport;cell organization and biogenesis;protein comple
AAEL000774	conserved hypothetical protein	D				GO:0007155,GO:0031012	ENSANGP00000015639 [Anopheles gambiae str. PEST]	Low density lipoproteinceptor, class A;Immunoglobulin I-set;Immunoglobulin;Immunoglobulin-like	cell adhesion;extracellular matrix
AAEL000775	antibacterial peptide, putative	I					ENSANGP00000026130 [Anopheles gambiae str. PEST]
AAEL000776	conserved hypothetical protein	D				GO:0005622,GO:0008270	PREDICTED: similar to hypothetical protein [Apis mellifera]	Zinc finger, RING-type;Zinc finger, B-box;MATH	intracellular;zinc ion binding											0.798611	0.671602	0.31588	0.39172	0.539586	0.686117	0.482756	-0.438886
AAEL000777	antibacterial peptide, putative	I
AAEL000778	conserved hypothetical protein	D				GO:0006508,GO:0008233,GO:0008237	ENSANGP00000020408 [Anopheles gambiae str. PEST]	Protein prenyltransferase, alpha subunit;Ribosomal protein S2;Peptidase M28;Peptidase M20	proteolysis;peptidase activity;metallopeptidase activity
AAEL000779	hypothetical protein	U					hypothetical protein CAGL0A02475g [Candida glabrata CBS138]
AAEL000780	amino acid transporter	TRP				GO:0005215,GO:0005623,GO:0006519,GO:0006810	ENSANGP00000008381 [Anopheles gambiae str. PEST]	Amino acid transporter, transmembrane;Amino acid/polyamine transporter II	transporter activity;cell;amino acid and derivative metabolism;transport				-0.314331								-0.876331	-1.41164
AAEL000781	hypothetical protein	D				GO:0005634,GO:0006511,GO:0007275	ENSANGP00000021310 [Anopheles gambiae str. PEST]		nucleus;ubiquitin-dependent protein catabolism;development
AAEL000782	conserved hypothetical protein	D				GO:0005198,GO:0005635,GO:0015031,GO:0016043,GO:0043234	ENSANGP00000012703 [Anopheles gambiae str. PEST]	Pollen allergen Poa pIX/Phl pVI, C-terminal;Antifreeze protein, type I;Nsp1-like, C-terminal	structural molecule activity;nuclear envelope;protein transport;cell organization and biogenesis;protein complex				0.0794513	-0.0769714	-0.0989355		-0.199692				0.26858			0.166181			-0.142815
AAEL000783	conserved hypothetical protein	U										-0.267482	-0.515404	-0.333653	-0.38535	-0.338101	-0.251445	-0.367048	-0.311815	0.45471	0.113624		0.21814	0.31934	0.251967	0.146553
AAEL000784	hypothetical protein	D				GO:0003676,GO:0005634,GO:0008270	ENSANGP00000012581 [Anopheles gambiae str. PEST]	Zinc finger, C2H2-type;Zinc finger, C2H2-subtype	nucleic acid binding;nucleus;zinc ion binding
AAEL000785	conserved hypothetical protein	U					ENSANGP00000021234 [Anopheles gambiae str. PEST]	Protein of unknown function DUF1168				-0.314419	-0.474144	-0.0585141	-0.387121	-0.205354	-0.465257	-0.186957	0.103873	-0.325531	-0.136835	-0.310708	-0.0497998	-0.166956	-0.158856	-0.130969	-0.39955
AAEL000786	hypothetical protein	D				GO:0007155,GO:0031012	ENSANGP00000016938 [Anopheles gambiae str. PEST]	EGF-like region;EGF-like, laminin	cell adhesion;extracellular matrix
AAEL000787	ubiquitin c-terminal hydrolase x4	PROT				GO:0004221,GO:0005622,GO:0006511,GO:0009056,GO:0019538	ENSANGP00000008782 [Anopheles gambiae str. PEST]	Peptidase C12, ubiquitin carboxyl-terminal hydrolase 1	ubiquitin thiolesterase activity;intracellular;ubiquitin-dependent protein catabolism;catabolism;protein metabolism
AAEL000788	matrix metalloproteinase	PROT				GO:0000003,GO:0005198,GO:0005488,GO:0005578,GO:0005886,GO:0008219,GO:0008233,GO:0019538,GO:0050789	ENSANGP00000021240 [Anopheles gambiae str. PEST]	Peptidase M, neutral zinc metallopeptidases, zinc-binding site;Peptidase M10A and M12B, matrixin and adamalysin;Hemopexin	reproduction;structural molecule activity;binding;extracellular matrix (sensu Metazoa);plasma membrane;cell death;peptidase activity;protein metabolism;regulation of biological process
AAEL000789	hypothetical protein	U
AAEL000790	conserved hypothetical protein	D				GO:0000270	Matrix metalloproteinase 2 CG1794-PA, isoform A [Drosophila melanogaster]	Peptidoglycan-binding domain 1	peptidoglycan metabolism
AAEL000791	hypothetical protein	U					Tes14 [Drosophila mulleri]					-0.079997	-0.288458	-0.0997054	0.210759	-0.342409	-0.177701	-1.44828	-0.803369	0.124987	-1.05703	-0.184384	-0.106163	-1.14599	-0.413044	-0.654131	-0.208234
AAEL000792	conserved hypothetical protein	D				GO:0003677,GO:0006355	ENSANGP00000027125 [Anopheles gambiae str. PEST]	HMG1/2 (high mobility group) box	DNA binding;regulation of transcription\, DNA-dependent
AAEL000793	venom allergen	M				GO:0005576,GO:0008152,GO:0009607		Allergen V5/Tpx-1 related;Ves allergen	extracellular region;metabolism;response to biotic stimulus											1.26611	1.24408	1.70491	1.00716	0.792378	0.732417	0.869019	1.32726
AAEL000794	eukaryotic translation initiation factor 3 subunit (eif-3)	RTT				GO:0005737,GO:0006412,GO:0008135,GO:0043234,GO:0050789	ENSANGP00000025738 [Anopheles gambiae str. PEST]		cytoplasm;protein biosynthesis;translation factor activity\, nucleic acid binding;protein complex;regulation of biological process
AAEL000795	ubiquitin	D				GO:0005515,GO:0005634,GO:0005737,GO:0006259,GO:0006350,GO:0006464,GO:0006950,GO:0006996,GO:0007028,GO:0007582,GO:0009056,GO:0009628,GO:0019538,GO:0050789		Ubiquitin	protein binding;nucleus;cytoplasm;DNA metabolism;transcription;protein modification;response to stress;organelle organization and biogenesis;cytoplasm organization and biogenesis;physiological process;catabolism;response to abiotic stimulus;protein metabo			0.662391	0.215926	0.0841627	0.472121	0.542323	0.742025	0.442372	0.691503	0.639809	0.118844	0.271981		0.241919	0.394137	0.489252	0.30639
AAEL000796	conserved hypothetical protein	CSR					odorant-binding protein AgamOBP32 [Anopheles gambiae]	Endoplasmic reticulum targeting sequence;Pheromone/general odorant binding protein, PBP/GOBP
AAEL000797	dimethylaniline monooxygenase	D				GO:0003824,GO:0005623,GO:0005739,GO:0005829,GO:0006118,GO:0006519	ENSANGP00000010229 [Anopheles gambiae str. PEST]	Flavin-containing monooxygenase FMO;FAD-dependent pyridine nucleotide-disulphide oxidoreductase;Pyridine nucleotide-disulphide oxidoreductase, class I;Adrenodoxin reductase;Mercuric reductase	catalytic activity;cell;mitochondrion;cytosol;electron transport;amino acid and derivative metabolism
AAEL000798	sterol regulatory element binding protein cleavage-activating protein (srebp cleavage-activating protein) (scap)	D				GO:0006464,GO:0015031,GO:0016043	ENSANGP00000018415 [Anopheles gambiae str. PEST]	WD-40 repeat;Sterol-sensing 5TM box	protein modification;protein transport;cell organization and biogenesis
AAEL000799	hypothetical protein	U					hypothetical protein TTHERM_01367700 [Tetrahymena thermophila SB210]
AAEL000800	microsomal dipeptidase	PROT				GO:0000166,GO:0003824,GO:0006139,GO:0006412,GO:0006519,GO:0008233,GO:0019538	ENSANGP00000019207 [Anopheles gambiae str. PEST]	Peptidase M19, renal dipeptidase, active site;Peptidase M19, renal dipeptidase	nucleotide binding;catalytic activity;nucleobase\, nucleoside\, nucleotide and nucleic acid metabolism;protein biosynthesis;amino acid and derivative metabolism;peptidase activity;protein metabolism				-0.881087	0.430789	0.453101	-0.429966	-0.568088		-0.51101		-1.01144	0.228381			-0.861003	0.309407	-0.46284
AAEL000801	metalloproteinase, putative	PROT				GO:0006508,GO:0008533	ENSANGP00000010588 [Anopheles gambiae str. PEST]	Peptidase M, neutral zinc metallopeptidases, zinc-binding site;Peptidase M12A, astacin	proteolysis;astacin activity
AAEL000802	conserved hypothetical protein	U					ENSANGP00000018463 [Anopheles gambiae str. PEST]							0.149234	0.130368	0.284479		-0.234616	0.116261		-0.0755226	-0.144288
AAEL000803	conserved hypothetical protein	D				GO:0005576,GO:0007165	ENSANGP00000024207 [Anopheles gambiae str. PEST]	Vascular endothelial growth factor receptor, VEGFR;Vascular cell adhesion molecule-1;Immunoglobulin V-set;Immunoglobulin;Immunoglobulin I-set;Immunoglobulin-like	extracellular region;signal transduction
AAEL000804	conserved hypothetical protein	U
AAEL000805	conserved hypothetical protein	D				GO:0003824	ENSANGP00000010159 [Anopheles gambiae str. PEST]	Phospholipase/Carboxylesterase;Esterase/lipase/thioesterase	catalytic activity
AAEL000806	hypothetical protein	D				GO:0003676,GO:0005634,GO:0008270	CG8301-PA [Drosophila melanogaster]		nucleic acid binding;nucleus;zinc ion binding
AAEL000807	Tetratricopeptide repeat protein, putative	D				GO:0007165,GO:0009607,GO:0030234	ENSANGP00000022059 [Anopheles gambiae str. PEST]	Tetratricopeptide TPR_1;Tetratricopeptide TPR_2;Heat shock protein DnaJ, N-terminal;Tetratricopeptide region	signal transduction;response to biotic stimulus;enzyme regulator activity			0.380657		-0.0772984	-0.0385259		-0.0658094	-0.274495		-0.262818				0.0412431	-0.0831224		-0.200953
AAEL000808	nucleoprotein, putative	D				GO:0019013	nucleocapsid major protein [Flanders virus]		viral nucleocapsid
AAEL000809	conserved hypothetical protein	D				GO:0003824,GO:0006519	ENSANGP00000022174 [Anopheles gambiae str. PEST]		catalytic activity;amino acid and derivative metabolism
AAEL000810	protein kinase c	D				GO:0000166,GO:0004672,GO:0004871,GO:0004872,GO:0006464,GO:0007049,GO:0007165,GO:0007267,GO:0007582,GO:0008289	ENSANGP00000022036 [Anopheles gambiae str. PEST]	Protein kinase;Serine/threonine protein kinase, active site;Protein kinase C, phorbol ester/diacylglycerol binding;Tyrosine protein kinase;C2;Protein kinase, C-terminal	nucleotide binding;protein kinase activity;signal transducer activity;receptor activity;protein modification;cell cycle;signal transduction;cell-cell signaling;physiological process;lipid binding
AAEL000811	conserved hypothetical protein	D					ENSANGP00000024229 [Anopheles gambiae str. PEST]	GPCR, family 2, secretin-like;Bacterial general secretion pathway protein F				0.537342	-0.209253	0.341221	0.33179	0.542881	0.362776	0.367466	0.65973
AAEL000812	conserved hypothetical protein	U					ENSANGP00000029468 [Anopheles gambiae str. PEST]					0.521616	0.272674	1.00027		0.746613	0.167934	0.755241	0.906107				-0.0926284			0.683729
AAEL000813	dimethylaniline monooxygenase	D				GO:0003824,GO:0005623,GO:0005739,GO:0005829,GO:0006118,GO:0006519	ENSANGP00000010229 [Anopheles gambiae str. PEST]	Flavin-containing monooxygenase FMO;FAD-dependent pyridine nucleotide-disulphide oxidoreductase;Pyridine nucleotide-disulphide oxidoreductase, class I;Adrenodoxin reductase;Mercuric reductase	catalytic activity;cell;mitochondrion;cytosol;electron transport;amino acid and derivative metabolism
AAEL000814	steroid dehydrogenase	M				GO:0003824,GO:0006629	ENSANGP00000013086 [Anopheles gambiae str. PEST]	Short-chain dehydrogenase/reductase SDR;Glucose/ribitol dehydrogenase;2,3-dihydro-2,3-dihydroxybenzoate dehydrogenase;Insect alcohol dehydrogenase family	catalytic activity;lipid metabolism
AAEL000815	conserved hypothetical protein	U					ENSANGP00000010615 [Anopheles gambiae str. PEST]	HEAT				-0.0726458	-0.443602	-0.273765	-0.255804	-0.218146	-0.375877	-0.333711	-0.366087				0.0726458	0.119913	-0.145585
AAEL000816	carbonic anhydrase	M				GO:0003824,GO:0005488,GO:0008152	ENSANGP00000029115 [Anopheles gambiae str. PEST]	Carbonic anhydrase, prokaryotic and plant	catalytic activity;binding;metabolism											-0.370306	-0.0748927	-0.0580519		-0.224428	-0.370653	-0.104513	-0.259394
AAEL000817	rhomboid	D				GO:0005623,GO:0007165	rhomboid-5 CG33304-PA [Drosophila melanogaster]	Rhomboid-like protein	cell;signal transduction
AAEL000818	conserved hypothetical protein	D				GO:0004872,GO:0005623,GO:0007165	ENSANGP00000028761 [Anopheles gambiae str. PEST]	Bride of sevenless protein;GPCR, family 3, metabotropic glutamate receptor-like	receptor activity;cell;signal transduction
AAEL000819	hypothetical protein	U					Erp42 protein [Borrelia burgdorferi]
AAEL000820	dimethylaniline monooxygenase	D				GO:0003824,GO:0005623,GO:0005739,GO:0005829,GO:0006118,GO:0006519	ENSANGP00000010229 [Anopheles gambiae str. PEST]	Flavin-containing monooxygenase FMO;FAD-dependent pyridine nucleotide-disulphide oxidoreductase;Pyridine nucleotide-disulphide oxidoreductase, class I;Adrenodoxin reductase;Mercuric reductase	catalytic activity;cell;mitochondrion;cytosol;electron transport;amino acid and derivative metabolism			0.420555	1.00875	1.18414	2.1823	0.664023	0.586812	0.361045	0.693811			0.587154	-0.420555	0.275225	0.280246		0.131584
AAEL000821	conserved hypothetical protein	CSR					putative odorant-binding protein OBP83a [Aedes aegypti]	Pheromone/general odorant binding protein, PBP/GOBP
AAEL000822	kinesin-like protein KLP68D	CS				GO:0000166,GO:0003774,GO:0005198,GO:0005856,GO:0006810,GO:0007010,GO:0015031,GO:0016043,GO:0043234	ENSANGP00000010166 [Anopheles gambiae str. PEST]	Kinesin, motor region	nucleotide binding;motor activity;structural molecule activity;cytoskeleton;transport;cytoskeleton organization and biogenesis;protein transport;cell organization and biogenesis;protein complex
AAEL000823	ribosomal protein L35A, putative	RTT				GO:0003676,GO:0005198,GO:0005829,GO:0005840,GO:0006412			nucleic acid binding			-0.257535	-0.469535	-0.349865	-0.231893		-0.395352	-0.333583	-0.131882	0.192412	-0.176219		0.226257	0.250155	0.153096	0.352046
AAEL000824	hypothetical protein	D				GO:0004089,GO:0008270,GO:0015976	ENSANGP00000029517 [Anopheles gambiae str. PEST]		carbonate dehydratase activity			-0.373494	-0.743637	0.114365		-0.406455	-0.239967		0.0599669	-0.432836	-0.302622	-0.0915544		-0.166875	-0.056284	-0.402264	-0.179144
AAEL000825	eukaryotic peptide chain release factor GTP-binding subunit (erf2) (tr	D				GO:0000166,GO:0005829,GO:0006412,GO:0008135,GO:0050789	ENSANGP00000002945 [Anopheles gambiae str. PEST]	EGF-like region;Protein synthesis factor, GTP-binding;Elongation factor Tu, domain 2;Elongation factor Tu, C-terminal	nucleotide binding;cytosol;protein biosynthesis;translation factor activity\, nucleic acid binding;regulation of biological process			0.31155	-0.369684	0.28398	-0.0302007	0.406634	0.0145859	0.397998	0.282747	0.136383	-0.589997	-0.200958	-0.0932699	-0.176472	-0.0760229	0.18706	-0.147185
AAEL000826	hypothetical protein	D				GO:0003676,GO:0005488,GO:0005634,GO:0008233,GO:0019538	ENSANGP00000017592 [Anopheles gambiae str. PEST]	Zinc finger, C2H2-type;Zinc finger, C2H2-subtype	nucleic acid binding;binding;nucleus;peptidase activity;protein metabolism
AAEL000827	conserved hypothetical protein	CSR					putative odorant-binding protein OBP83a [Aedes aegypti]	Endoplasmic reticulum targeting sequence;Pheromone/general odorant binding protein, PBP/GOBP
AAEL000828	vitellogenin, putative	M				GO:0000003,GO:0005198,GO:0006629,GO:0016787	ENSANGP00000009935 [Anopheles gambiae str. PEST]	Lipase, active site;Lipase;Esterase/lipase/thioesterase	reproduction;structural molecule activity;lipid metabolism;hydrolase activity
AAEL000829	dimethylaniline monooxygenase	D				GO:0003824,GO:0005623,GO:0005739,GO:0005829,GO:0006118,GO:0006519	ENSANGP00000010229 [Anopheles gambiae str. PEST]	Flavin-containing monooxygenase FMO;Adrenodoxin reductase;FAD-dependent pyridine nucleotide-disulphide oxidoreductase;Pyridine nucleotide-disulphide oxidoreductase, class I	catalytic activity;cell;mitochondrion;cytosol;electron transport;amino acid and derivative metabolism
AAEL000830	steroid dehydrogenase	M				GO:0003824,GO:0006629	ENSANGP00000013086 [Anopheles gambiae str. PEST]	Short-chain dehydrogenase/reductase SDR;Glucose/ribitol dehydrogenase;2,3-dihydro-2,3-dihydroxybenzoate dehydrogenase;Insect alcohol dehydrogenase family	catalytic activity;lipid metabolism
AAEL000831	conserved hypothetical protein	CSR					putative odorant-binding protein OBP83a [Aedes aegypti]	Pheromone/general odorant binding protein, PBP/GOBP
AAEL000832	cleavage and polyadenylation specificity factor cpsf	D				GO:0003723,GO:0005654,GO:0006139,GO:0043234	ENSANGP00000018461 [Anopheles gambiae str. PEST]	CPSF A subunit, C-terminal	RNA binding;nucleoplasm;nucleobase\, nucleoside\, nucleotide and nucleic acid metabolism;protein complex
AAEL000833	conserved hypothetical protein	CSR					odorant-binding protein OBPjj83c [Anopheles gambiae]	Pheromone/general odorant binding protein, PBP/GOBP				0.362306		-0.362505		-0.140112		-0.221038	-0.48819
AAEL000834	dimethylaniline monooxygenase	D				GO:0003824,GO:0005623,GO:0005739,GO:0005829,GO:0006118,GO:0006519			catalytic activity											0.268913	-0.604673	0.0476624	-0.631326	-0.409079	-0.192186	-0.402719	-0.209243
AAEL000835	conserved hypothetical protein	CSR					odorant-binding protein AgamOBP32 [Anopheles gambiae]	Endoplasmic reticulum targeting sequence;Pheromone/general odorant binding protein, PBP/GOBP
AAEL000836	spermatogenesis associated factor	D				GO:0005524	CG12010-PB, isoform B [Drosophila melanogaster]	AAA ATPase, central region;ATPase associated with various cellular activities, AAA-5	ATP binding											-0.245143	-0.534539	-0.358355		-0.190244			-1.02514
AAEL000837	conserved hypothetical protein	CSR					odorant-binding protein OBPjj83c [Anopheles gambiae]	Pheromone/general odorant binding protein, PBP/GOBP
AAEL000838	hypothetical protein	U					ENSANGP00000022056 [Anopheles gambiae str. PEST]
AAEL000839	O-fucosyltransferase, putative	D				GO:0005783,GO:0005794,GO:0006412,GO:0006464,GO:0007165,GO:0007275,GO:0016740,GO:0050789	ENSANGP00000018429 [Anopheles gambiae str. PEST]	Endoplasmic reticulum targeting sequence	endoplasmic reticulum;Golgi apparatus;protein biosynthesis;protein modification;signal transduction;development;transferase activity;regulation of biological process
AAEL000840	skeletal muscle/kidney enriched inositol 5-phosphatase	CS				GO:0006629,GO:0007010,GO:0007165,GO:0008152,GO:0016787	ENSANGP00000019166 [Anopheles gambiae str. PEST]	Endonuclease/exonuclease/phosphatase	lipid metabolism;cytoskeleton organization and biogenesis;signal transduction;metabolism;hydrolase activity			-1.03342	-0.0357536	-0.330628	-0.280427	-0.275331	-0.338448	-0.608321	-0.15111		-0.331108	0.0775544	0.475458	0.368111	0.331589	-0.229236	0.374407
AAEL000841	hypothetical protein	D				GO:0003676,GO:0005634,GO:0008270			nucleic acid binding
AAEL000842	microsomal dipeptidase	PROT				GO:0000166,GO:0003824,GO:0006139,GO:0006412,GO:0006519,GO:0008233,GO:0019538	ENSANGP00000025825 [Anopheles gambiae str. PEST]	Peptidase M19, renal dipeptidase, active site;Peptidase M19, renal dipeptidase	nucleotide binding;catalytic activity;nucleobase\, nucleoside\, nucleotide and nucleic acid metabolism;protein biosynthesis;amino acid and derivative metabolism;peptidase activity;protein metabolism				1.10881	0.531225	0.349165	1.13019	0.420474	0.572372	0.52514
AAEL000843	carbonic anhydrase II, putative	M				GO:0004089,GO:0006730,GO:0008270	ENSANGP00000014919 [Anopheles gambiae str. PEST]	Carbonic anhydrase, eukaryotic	carbonate dehydratase activity;one-carbon compound metabolism;zinc ion binding
AAEL000844	ad-003	D				GO:0016740	ENSANGP00000029713 [Anopheles gambiae str. PEST]	Protein of unknown function DUF858, methyltransferase-like;Methyltransferase type 11;Methyltransferase type 12;Generic methyltransferase;SAM (and some other nucleotide) binding motif	transferase activity
AAEL000845	protein-tyrosine phosphatase	D				GO:0000003,GO:0004721,GO:0004872,GO:0005623,GO:0005886,GO:0006464,GO:0007165,GO:0007275,GO:0009653,GO:0009790,GO:0016043,GO:0030154	ENSANGP00000019140 [Anopheles gambiae str. PEST]	Tyrosine specific protein phosphatase and dual specificity protein phosphatase;Tyrosine specific protein phosphatase;Fibronectin, type III	reproduction;phosphoprotein phosphatase activity;receptor activity;cell;plasma membrane;protein modification;signal transduction;development;morphogenesis;embryonic development;cell organization and biogenesis;cell differentiation			-0.646052	0.720804		-0.740001	0.548971	-0.57069	-0.403008	0.805297				1.20368
AAEL000846	conserved hypothetical protein	CSR					putative odorant-binding protein OBP83a [Aedes aegypti]	Endoplasmic reticulum targeting sequence;Pheromone/general odorant binding protein, PBP/GOBP
AAEL000847	conserved hypothetical protein	U					ENSANGP00000015954 [Anopheles gambiae str. PEST]	Protein of unknown function DUF866, eukaryotic
AAEL000848	poly(a) polymerase	RTT				GO:0003723,GO:0006139,GO:0016740	ENSANGP00000010598 [Anopheles gambiae str. PEST]	Polynucleotide adenylyltransferase region	RNA binding;nucleobase\, nucleoside\, nucleotide and nucleic acid metabolism;transferase activity			-0.401406		-0.169062	-0.158613	-0.206164	-0.408316	-0.333139		-0.262688	0.0768147	-0.188342		0.0340918	-0.187474	-0.191226	-0.321913
AAEL000849	nervous fingers, putative	D				GO:0003676,GO:0005488,GO:0005634,GO:0006350,GO:0009653,GO:0016043,GO:0030154,GO:0030528,GO:0050789	ENSANGP00000029071 [Anopheles gambiae str. PEST]	Zinc finger, C2H2-type	nucleic acid binding;binding;nucleus;transcription;morphogenesis;cell organization and biogenesis;cell differentiation;transcription regulator activity;regulation of biological process
AAEL000850	tyrosine kinase receptor	D				GO:0000166,GO:0004672,GO:0004872,GO:0005509,GO:0005886,GO:0006464,GO:0007165,GO:0007275,GO:0008283	ENSANGP00000019144 [Anopheles gambiae str. PEST]	Protein kinase;Tyrosine protein kinase, active site;Tyrosine protein kinase;Cadherin;Prolinech region	nucleotide binding;protein kinase activity;receptor activity;calcium ion binding;plasma membrane;protein modification;signal transduction;development;cell proliferation											-0.414384				-0.327577			0.214275
AAEL000851	conserved hypothetical protein	U					ENSANGP00000026627 [Anopheles gambiae str. PEST]										-0.220813
AAEL000852	peptidyl-prolyl cis/trans isomerase, putative	D				GO:0003824	ENSANGP00000010568 [Anopheles gambiae str. PEST]	PpiC-type peptidyl-prolyl cis-trans isomerase	catalytic activity			0.63823	-0.132908	0.528735	0.531014	0.389025	0.492155	0.502273	0.872766	-0.102445					-0.141667		0.734255
AAEL000853	skinny hedgehog/sightless/rasp	D				GO:0005623,GO:0005886,GO:0006412,GO:0006464,GO:0007165,GO:0009790,GO:0016740	ENSANGP00000010614 [Anopheles gambiae str. PEST]	Membrane bound O-acyl transferase, MBOAT	cell;plasma membrane;protein biosynthesis;protein modification;signal transduction;embryonic development;transferase activity												-0.637393	-0.405019	-0.4558	-0.334056	-0.242875	-0.274176	-0.369847
AAEL000854	fumarylacetoacetate hydrolase	M				GO:0003824,GO:0006519,GO:0009056	ENSANGP00000019158 [Anopheles gambiae str. PEST]	Fumarylacetoacetate (FAA) hydrolase	catalytic activity;amino acid and derivative metabolism;catabolism			-0.799578	0.195223	0.606604	0.665222	0.355195	0.326289		-0.63043		-0.159055	0.141843	0.238024	-0.0875752	-0.154497	-0.242864	-1.17827
AAEL000855	mannosyltransferase 1, putative	D				GO:0005623,GO:0006412,GO:0006464,GO:0016740	ENSANGP00000021267 [Anopheles gambiae str. PEST]	Glycosyl transferase, family 39;MIR	cell;protein biosynthesis;protein modification;transferase activity
AAEL000856	germ cell-less protein	D				GO:0000003,GO:0005515,GO:0005634,GO:0005635,GO:0005737,GO:0006350,GO:0030154,GO:0043234,GO:0050789	ENSANGP00000017845 [Anopheles gambiae str. PEST]	BTB/POZ;BTB	reproduction;protein binding;nucleus;nuclear envelope;cytoplasm;transcription;cell differentiation;protein complex;regulation of biological process													0.46569			-0.16579		0.376834
AAEL000857	conserved hypothetical protein	D				GO:0003676,GO:0005634,GO:0008270	ENSANGP00000014041 [Anopheles gambiae str. PEST]	Zinc finger, C2H2-type;Zinc finger, C2H2-subtype	nucleic acid binding;nucleus;zinc ion binding
AAEL000858	ral guanine nucleotide exchange factor, putative	D				GO:0007165,GO:0030234	ENSANGP00000026631 [Anopheles gambiae str. PEST]	Guanine-nucleotide dissociation stimulator CDC25;Guanine nucleotide exchange factor for Ras-like GTPases, N-terminal;RA	signal transduction;enzyme regulator activity
AAEL000859	hypothetical protein	D				GO:0003824,GO:0005975,GO:0006091,GO:0009056	GA12325-PA [Drosophila pseudoobscura]	Protein of unknown function DUF753	catalytic activity;carbohydrate metabolism;generation of precursor metabolites and energy;catabolism			0.287897	-0.698763	-0.348518	-1.37293		-1.30222		-0.484566
AAEL000860	conserved hypothetical protein	D				GO:0005623,GO:0005886,GO:0009653,GO:0016043,GO:0030154	ENSANGP00000017940 [Anopheles gambiae str. PEST]		cell;plasma membrane;morphogenesis;cell organization and biogenesis;cell differentiation
AAEL000861	hypothetical protein	U					ENSANGP00000025882 [Anopheles gambiae str. PEST]	Protein of unknown function DUF753
AAEL000862	carboxylesterase	REDOX/STRESS/MIT				GO:0016787	ENSANGP00000012430 [Anopheles gambiae str. PEST]	Carboxylesterase, type B;Esterase/lipase/thioesterase	hydrolase activity
AAEL000863	SPASIC protein, putative	D				GO:0005272,GO:0006814,GO:0016020	GA21154-PA [Drosophila pseudoobscura]	Na+ channel, amiloride-sensitive	sodium channel activity;sodium ion transport;membrane
AAEL000864	sex-determining region y protein, sry	D				GO:0003700,GO:0005634,GO:0006350,GO:0007275,GO:0007582,GO:0050789	ENSANGP00000012491 [Anopheles gambiae str. PEST]	High mobility group proteins HMG1 and HMG2;Antifreeze protein, type I;HMG1/2 (high mobility group) box	transcription factor activity;nucleus;transcription;development;physiological process;regulation of biological process
AAEL000865	hypothetical protein	U					hypothetical protein LOC550590 [Danio rerio]
AAEL000866	hypothetical protein	D					Pseudouridine synthase, Rsu [Ralstonia eutropha JMP134]
AAEL000867	f-box protein	D					ENSANGP00000011589 [Anopheles gambiae str. PEST]	Cyclin-like F-box;Kelch repeat;Kelch;Prolinech region												-0.215339	-0.224715	-0.224127		-0.284907			-0.118642
AAEL000868	conserved hypothetical protein	D				GO:0005515	ENSANGP00000019671 [Anopheles gambiae str. PEST]	PDZ/DHR/GLGF	protein binding											0.334641	0.0932728			0.077636		0.174369
AAEL000869	zinc finger protein	D				GO:0003700,GO:0005488,GO:0005634,GO:0006350,GO:0007165,GO:0007275,GO:0008283,GO:0009653,GO:0016043,GO:0030154,GO:0030528,GO:0050789	ENSANGP00000012589 [Anopheles gambiae str. PEST]	Zinc finger, C2H2-type;Zinc finger, C2H2-subtype	transcription factor activity;binding;nucleus;transcription;signal transduction;development;cell proliferation;morphogenesis;cell organization and biogenesis;cell differentiation;transcription regulator activity;regulation of biological process
AAEL000870	conserved hypothetical protein	U					IP09321p [Drosophila melanogaster]					0.241054		-0.291712	-0.0778161	-0.0356594		-0.379247	-0.342604				-0.241054
AAEL000871	conserved hypothetical protein	D				GO:0003824	ENSANGP00000021192 [Anopheles gambiae str. PEST]	Male sterility C-terminal;Male sterility	catalytic activity
AAEL000873	pickpocket	TRP				GO:0005216,GO:0005623,GO:0006811	ENSANGP00000016463 [Anopheles gambiae str. PEST]	Na+ channel, amiloride-sensitive	ion channel activity;cell;ion transport
AAEL000874	hypothetical protein	U					GH17715p [Drosophila melanogaster]
AAEL000875	conserved hypothetical protein	U					ENSANGP00000014136 [Anopheles gambiae str. PEST]	WW/Rsp5/WWP						-0.353417										-0.453121
AAEL000876	conserved hypothetical protein	D				GO:0003824	ENSANGP00000028009 [Anopheles gambiae str. PEST]	Male sterility C-terminal;Male sterility	catalytic activity
AAEL000877	conserved hypothetical protein	U					ENSANGP00000001833 [Anopheles gambiae str. PEST]					0.392343	0.460265	0.58216	0.541725	0.266208	0.518985	0.284099	0.463096	0.116995		0.292757	-0.39123	-0.402026	-0.232576		-0.10709
AAEL000878	cuticle protein, putative	CS					ENSANGP00000028691 [Anopheles gambiae str. PEST]
AAEL000879	cuticle protein, putative	CS					ENSANGP00000028691 [Anopheles gambiae str. PEST]
AAEL000880	hypothetical protein	D				GO:0003676,GO:0005634,GO:0008270	ENSANGP00000020217 [Anopheles gambiae str. PEST]	Zinc finger, C2H2-type;Zinc finger, C2H2-subtype;Zinc finger, AD-type	nucleic acid binding;nucleus;zinc ion binding											0.381779	-0.187778	0.483653		0.137438	0.386906	0.600821	0.120642
AAEL000881	conserved hypothetical protein	U					ENSANGP00000028691 [Anopheles gambiae str. PEST]
AAEL000882	conserved hypothetical protein	D					ENSANGP00000028009 [Anopheles gambiae str. PEST]	Male sterility C-terminal;Male sterility
AAEL000883	hypothetical protein	D				GO:0003676,GO:0005515,GO:0005634,GO:0006915			nucleic acid binding
AAEL000884	eukaryotic translation initiation factor 2 alpha kinase 1 (hemegulated eukaryotic initiation factor eif-2-alpha kinase)	RTT				GO:0004672,GO:0005524,GO:0006468	ENSANGP00000012388 [Anopheles gambiae str. PEST]	Protein kinase	protein kinase activity;ATP binding;protein amino acid phosphorylation			-0.671345	-0.409895	-1.01464	-0.644469	-0.741614	-0.563518	-0.756904	-1.34252	-0.581547	-0.632085	-1.56458	-0.621463	-0.711818	-0.85914	-0.80267	-2.2921
AAEL000885	cytoplasmic dynein heavy chain	D				GO:0000003,GO:0000166,GO:0003774,GO:0005198,GO:0005215,GO:0005856,GO:0006810,GO:0007010,GO:0007582,GO:0007610,GO:0009605,GO:0009628,GO:0015031,GO:0016043,GO:0016787,GO:0043234	ENSANGP00000021284 [Anopheles gambiae str. PEST]	Calicivirus helicase/polymerase/peptidase polyprotein;ATPase associated with various cellular activities, AAA-5;Dynein heavy chain;ATP/GTP-binding site motif A (P-loop)	reproduction;nucleotide binding;motor activity;structural molecule activity;transporter activity;cytoskeleton;transport;cytoskeleton organization and biogenesis;physiological process;behavior;response to external stimulus;response to abiotic stimulus;prot
AAEL000886	hypothetical protein	D					putative salivary secreted peptide form 1 [Aedes albopictus]
AAEL000887	conserved hypothetical protein	U					ENSANGP00000028253 [Anopheles gambiae str. PEST]
AAEL000888	single stranded DNA binding protein	D				GO:0003677,GO:0005634,GO:0006350,GO:0030528,GO:0050789			DNA binding
AAEL000889	carboxylesterase	REDOX/STRESS/MIT				GO:0016787	ENSANGP00000012430 [Anopheles gambiae str. PEST]	Carboxylesterase, type B;Esterase/lipase/thioesterase	hydrolase activity																-0.428985		-0.594741
AAEL000890	conserved hypothetical protein	U					ENSANGP00000012529 [Anopheles gambiae str. PEST]
AAEL000891	conserved hypothetical protein	U					ENSANGP00000028852 [Anopheles gambiae str. PEST]
AAEL000892	hypothetical protein	U
AAEL000893	sex-determining region y protein, sry	D				GO:0003677,GO:0003700,GO:0005634,GO:0006350,GO:0007275,GO:0007582,GO:0050789	ENSANGP00000012626 [Anopheles gambiae str. PEST]	High mobility group proteins HMG1 and HMG2;Antifreeze protein, type I;HMG1/2 (high mobility group) box	DNA binding;transcription factor activity;nucleus;transcription;development;physiological process;regulation of biological process
AAEL000894	hunchback protein	D				GO:0003677,GO:0005488,GO:0005634,GO:0006350,GO:0007165,GO:0007275,GO:0007582,GO:0009653,GO:0009790,GO:0030154,GO:0030528,GO:0050789	ENSANGP00000001785 [Anopheles gambiae str. PEST]	Zinc finger, C2H2-type	DNA binding;binding;nucleus;transcription;signal transduction;development;physiological process;morphogenesis;embryonic development;cell differentiation;transcription regulator activity;regulation of biological process
AAEL000895	peroxisome biogenesis factor 1 (peroxin-1)	REDOX/STRESS/MIT				GO:0000166,GO:0005777,GO:0006996,GO:0007049,GO:0015031,GO:0016787	ENSANGP00000012419 [Anopheles gambiae str. PEST]	AAA-protein subdomain;AAA ATPase, central region	nucleotide binding;peroxisome;organelle organization and biogenesis;cell cycle;protein transport;hydrolase activity			0.410601	-0.0283332		0.329925	0.375445	0.496349	0.196079	0.388997	-0.429452	-0.337665	-0.449912	-0.0591093	-0.987908	-0.539724	-0.999179	-0.247918
AAEL000896	conserved hypothetical protein	U					ENSANGP00000012529 [Anopheles gambiae str. PEST]
AAEL000897	conserved hypothetical protein	D					ENSANGP00000012570 [Anopheles gambiae str. PEST]	Tetratricopeptide TPR_1;Tetratricopeptide TPR_2;Tetratricopeptide region														-0.775608
AAEL000898	carboxylesterase	REDOX/STRESS/MIT				GO:0016787	ENSANGP00000012430 [Anopheles gambiae str. PEST]	Carboxylesterase, type B;Esterase/lipase/thioesterase	hydrolase activity			-1.64829			-0.264817	0.42717	-0.406526		-0.388054		-0.168174		1.64829		-0.45483		-0.733285
AAEL000899	glycosyltransferase	D					CG3419-PB, isoform B [Drosophila melanogaster]	Alg9-like mannosyltransferase				0.296943	-0.425474	-0.251889		-0.298212			-0.562608	-0.351276		-0.267129	-0.283871		-0.191503	-0.249492	-0.204628
AAEL000900	conserved hypothetical protein	D				GO:0005737,GO:0007349,GO:0016020	ENSANGP00000000595 [Anopheles gambiae str. PEST]	Serendipity locus alpha	cytoplasm;;membrane											-0.190671		-0.17688	-0.22911			0.0983233
AAEL000901	conserved hypothetical protein	CS				GO:0005576,GO:0006030,GO:0008061	ENSANGP00000029409 [Anopheles gambiae str. PEST]	Chitin binding Peritrophin-A	extracellular region;chitin metabolism;chitin binding
AAEL000902	sugar transporter	TRP				GO:0005215,GO:0006810,GO:0016021	ENSANGP00000020524 [Anopheles gambiae str. PEST]	Sugar transporter superfamily;Major facilitator superfamily MFS_1;General substrate transporter;Major facilitator superfamily	transporter activity;transport;integral to membrane			0.48758	-0.198786	0.286185	0.273906		0.319383	0.492634	0.308866		-0.359782	-0.389263	-0.48758	-0.454994		0.113854	-0.573711
AAEL000903	hypothetical protein (enhancer of yellow 2 [Culex quinquefasciatus])	U					enhancer of yellow 2 [Culex quinquefasciatus]						1.36461	1.32914	1.13661	1.40817	1.65274	1.37534	1.35909	-0.898268	0.478854	0.560685	1.37586	0.688272	0.675112	0.708566	1.33569
AAEL000904	carboxylesterase	REDOX/STRESS/MIT				GO:0016787	ENSANGP00000012430 [Anopheles gambiae str. PEST]	Carboxylesterase, type B;Peptidase M14, carboxypeptidase A;Esterase/lipase/thioesterase	hydrolase activity													-0.439042
AAEL000905	carboxylesterase	REDOX/STRESS/MIT				GO:0016787	ENSANGP00000012430 [Anopheles gambiae str. PEST]	Carboxylesterase, type B;Esterase/lipase/thioesterase	hydrolase activity			0.716076	0.754775			0.346686	-0.305759	0.297244	0.574986
AAEL000906	guanyl-nucleotide exchange factor	D				GO:0006810,GO:0007275,GO:0015031,GO:0016043,GO:0030154,GO:0030234	ENSANGP00000004923 [Anopheles gambiae str. PEST]	IQ calmodulin-binding region;SEC7-like	transport;development;protein transport;cell organization and biogenesis;cell differentiation;enzyme regulator activity													-0.204569		0.0634824	-0.307815	0.247595	-0.298705
AAEL000907	hypothetical protein	U					PREDICTED: hypothetical protein XP_687754 [Danio rerio]
AAEL000908	conserved hypothetical protein	D				GO:0005515	ENSANGP00000021256 [Anopheles gambiae str. PEST]	PDZ/DHR/GLGF;Prolinech region	protein binding
AAEL000909	histone H1, putative	RTT					ENSANGP00000028691 [Anopheles gambiae str. PEST]
AAEL000910	conserved hypothetical protein	D				GO:0003824	ENSANGP00000028009 [Anopheles gambiae str. PEST]	Male sterility C-terminal;Male sterility	catalytic activity													0.241251		0.342928
AAEL000911	conserved hypothetical protein	U					GA14757-PA [Drosophila pseudoobscura]
AAEL000912	conserved hypothetical protein	D				GO:0003824	ENSANGP00000028009 [Anopheles gambiae str. PEST]	Male sterility C-terminal;Male sterility	catalytic activity
AAEL000913	conserved hypothetical protein	U					IP09321p [Drosophila melanogaster]
AAEL000914	conserved hypothetical protein	U
AAEL000915	hypothetical protein	D				GO:0003824,GO:0005975,GO:0006091,GO:0009056	GA12325-PA [Drosophila pseudoobscura]	Protein of unknown function DUF753	catalytic activity;carbohydrate metabolism;generation of precursor metabolites and energy;catabolism			-0.814866	-1.20021	-0.717489	-0.475802		-0.824128	-0.867353
AAEL000916	conserved hypothetical protein	U					ENSANGP00000028691 [Anopheles gambiae str. PEST]
AAEL000917	conserved hypothetical protein	D				GO:0005216,GO:0005623,GO:0006811	CG8546-PA [Drosophila melanogaster]	Na+ channel, amiloride-sensitive	ion channel activity;cell;ion transport
AAEL000918	carboxylesterase	REDOX/STRESS/MIT				GO:0016787	ENSANGP00000012405 [Anopheles gambiae str. PEST]	Carboxylesterase, type B;Peptidase M14, carboxypeptidase A;Esterase/lipase/thioesterase	hydrolase activity
AAEL000919	hypothetical protein	U
AAEL000920	hypothetical protein	U					unnamed protein product [Homo sapiens]
AAEL000921	conserved hypothetical protein	U					ENSANGP00000028691 [Anopheles gambiae str. PEST]
AAEL000922	polyribonucleotide nucleotidyltransferase	D				GO:0003676,GO:0003723,GO:0004518,GO:0006139,GO:0009056,GO:0016740	ENSANGP00000021260 [Anopheles gambiae str. PEST]	Exoribonuclease;KH, type 1;RNA binding S1	nucleic acid binding;RNA binding;nuclease activity;nucleobase\, nucleoside\, nucleotide and nucleic acid metabolism;catabolism;transferase activity				-0.584371	-0.161388	-0.268583	-0.573356	-0.32161	-0.428378	-0.549412	0.275266		0.0848339	0.140505	0.175964	0.114568	-0.327127	-0.235007
AAEL000923	conserved hypothetical protein	D					ENSANGP00000021761 [Anopheles gambiae str. PEST]	EGF-like region;Nematode-specific EB region												-0.651893	0.0136705			0.454471	0.296681	-0.387967	-0.327258
AAEL000924	eukaryotic translation initiation factor 2-alpha kinase	RTT				GO:0000166,GO:0003824,GO:0004672,GO:0004871,GO:0005829,GO:0006412,GO:0006464,GO:0050789	ENSANGP00000011194 [Anopheles gambiae str. PEST]	RWD;Protein kinase	nucleotide binding;catalytic activity;protein kinase activity;signal transducer activity;cytosol;protein biosynthesis;protein modification;regulation of biological process				0.21445		-0.144565					0.16268		-0.212056				-0.011634	-0.263446
AAEL000925	leucine-zipper-like transcriptional regulator 1 (LZTR-1)	D				GO:0003700,GO:0005515,GO:0005634,GO:0006139	ENSANGP00000013413 [Anopheles gambiae str. PEST]	Kelch repeat;Kelch;BTB/POZ;BTB	transcription factor activity;protein binding;nucleus;nucleobase\, nucleoside\, nucleotide and nucleic acid metabolism
AAEL000926	pickpocket	TRP				GO:0005216,GO:0005623,GO:0006811	ENSANGP00000016463 [Anopheles gambiae str. PEST]	Na+ channel, amiloride-sensitive	ion channel activity;cell;ion transport
AAEL000927	hypothetical protein	U										0.202543	-0.631016	-0.341298	-0.539744	-0.472274	-0.0850119	-0.123206	-0.0736596	0.0259499	-0.608915	-0.419758	-0.351696	-0.138925	-0.145625	-0.178235	-0.180567
AAEL000928	conserved hypothetical protein	D				GO:0003824	ENSANGP00000028009 [Anopheles gambiae str. PEST]	Male sterility C-terminal;Male sterility	catalytic activity
AAEL000929	cytochrome c oxidase, subunit VIA, putative	REDOX/STRESS/MIT				GO:0004129,GO:0005740,GO:0006118	similar to Drosophila melanogaster CG17280 [Drosophila yakuba]	Cytochrome c oxidase, subunit VIa	cytochrome-c oxidase activity;mitochondrial envelope;electron transport							-0.295144	-0.206852		-0.411746
AAEL000930	conserved hypothetical protein	U					ENSANGP00000015974 [Anopheles gambiae str. PEST]
AAEL000931	alkaline phosphatase	D				GO:0007275,GO:0008152,GO:0016787	ENSANGP00000016308 [Anopheles gambiae str. PEST]	Alkaline phosphatase	development;metabolism;hydrolase activity			1.47344	0.940183			1.45125			0.456011		-0.189199	-0.381905	-1.36438		-0.222891	-1.20976	-0.43256
AAEL000932	conserved hypothetical protein	D				GO:0005179,GO:0005576,GO:0007582	insulin-like peptide 6 precursor [Anopheles gambiae]		hormone activity;extracellular region;physiological process
AAEL000933	conserved hypothetical protein	U					ENSANGP00000004406 [Anopheles gambiae str. PEST]															-0.214664
AAEL000934	clathrin light chain	TRP				GO:0005326,GO:0005737,GO:0005886,GO:0006810,GO:0007267,GO:0015031,GO:0016023,GO:0016043			neurotransmitter transporter activity
AAEL000935	hypothetical protein	U					ENSANGP00000011824 [Anopheles gambiae str. PEST]
AAEL000936	hypothetical protein	REDOX/STRESS/MIT				GO:0031072	ENSANGP00000017982 [Anopheles gambiae str. PEST]	Heat shock protein DnaJ, N-terminal;Zinc finger, DHP-type	heat shock protein binding
AAEL000937	conserved hypothetical protein	PROT				GO:0005179,GO:0005576,GO:0007582	insulin-like peptide 7 precursor [Anopheles gambiae]	Peptidase, cysteine peptidase active site;Insulin/IGF/relaxin	hormone activity;extracellular region;physiological process
AAEL000938	conserved hypothetical protein	D					ENSANGP00000021203 [Anopheles gambiae str. PEST]	2OG-Fe(II) oxygenase;Methyltransferase type 11;Methyltransferase type 12;Generic methyltransferase;SAM (and some other nucleotide) binding motif					0.220238		-0.315819		-0.260862		-0.239537		0.0424519	-0.297291				-0.217266	-0.567526
AAEL000939	conserved hypothetical protein	D					ENSANGP00000017988 [Anopheles gambiae str. PEST]	Leucinech repeat, cysteine-containing
AAEL000940	conserved hypothetical protein	U					ENSANGP00000016995 [Anopheles gambiae str. PEST]					0.0117617	-0.372039	-0.282873	0.305678	0.254267	0.252539	0.0155306	-0.131665		-0.12982		0.146914			-0.293206	-0.0493137
AAEL000941	mitochondrial inner membrane protein translocase, 8kD-subunit, putative	REDOX/STRESS/MIT				GO:0006626,GO:0042719,GO:0045039	ENSANGP00000017986 [Anopheles gambiae str. PEST]	Zinc finger, Tim10/DDP-type	protein targeting to mitochondrion;mitochondrial intermembrane space protein transporter complex;protein import into mitochondrial inner membrane			-0.172756		0.151053	-0.638013	-0.329584	-0.321899		0.289445	-0.394889	-0.302067	-0.279057	-0.709824	-0.937174	-0.469915	-0.724637	-0.43857
AAEL000942	conserved hypothetical protein	U										0.672773	0.207918	0.746084	0.527611	0.736815	0.602952	0.720405	0.89725	-0.0665287		0.463561		0.388371	0.0634244		0.394469
AAEL000943	conserved hypothetical protein	U					ENSANGP00000008752 [Anopheles gambiae str. PEST]	Protein of unknown function DUF1115;RWD
AAEL000944	conserved hypothetical protein	U					ENSANGP00000015679 [Anopheles gambiae str. PEST]
AAEL000945	conserved hypothetical protein	D					ENSANGP00000017926 [Anopheles gambiae str. PEST]	Calcium-binding EF-hand;Tetratricopeptide TPR_1;Tetratricopeptide TPR_2;Tetratricopeptide region
AAEL000946	conserved hypothetical protein	U					ENSANGP00000028963 [Anopheles gambiae str. PEST]
AAEL000947	microsomal signal peptidase 23 kd subunit (spc22/23)	D				GO:0005623,GO:0005783,GO:0006464,GO:0008233,GO:0019538,GO:0043234	ENSANGP00000018480 [Anopheles gambiae str. PEST]	Signal peptidase 22 kDa subunit	cell;endoplasmic reticulum;protein modification;peptidase activity;protein metabolism;protein complex			0.365862	0.1956	0.196242	0.292048	0.414514	0.443582	0.279074	0.14447	-0.0768376	0.130863	0.200642	-0.0554221	0.276294	0.238322
AAEL000948	membrane, integral membrane	CS					ENSANGP00000027364 [Anopheles gambiae str. PEST]	CD9/CD37/CD63 antigen				0.305023	0.220892	0.188289	0.241806	0.253495	0.488092		-0.0961813				-0.305023
AAEL000949	conserved hypothetical protein	U					ENSANGP00000017963 [Anopheles gambiae str. PEST]													-0.267706	-0.311358	-0.334109		-0.184631	-0.386731	-0.39491	-0.268097
AAEL000950	conserved hypothetical protein	U					ENSANGP00000016262 [Anopheles gambiae str. PEST]	Low temperature viability protein				-0.579454	0.138808	-0.694114	-0.0526516	-0.435974	-0.334968	-0.0647459	-0.213585	-0.248855	0.466589	-0.929465	-0.353759	-0.192215	-0.321196	0.214465	-0.508456
AAEL000951	elongation factor 1-beta2	RTT				GO:0005737,GO:0006412,GO:0008135,GO:0030234,GO:0043234			cytoplasm			-0.492142	-0.0223176	0.234786	-0.637126		0.0369944	-0.197118	-0.490593	-1.02595	-1.71751	-0.541943	-1.46439	-0.658492	-0.447663	-0.686166	-1.25672
AAEL000952	binding	D					ENSANGP00000027514 [Anopheles gambiae str. PEST]					0.41995	0.798351	0.507787	0.739705	0.801552	0.732913	0.638775	0.378587	0.318355	0.540947		0.0223156	0.30901	0.12917	0.32992	-0.186468
AAEL000953	conserved hypothetical protein	U					ENSANGP00000013842 [Anopheles gambiae str. PEST]					0.0872297	0.0323506		0.177101	0.200003	-0.237992	0.386483			0.19059	0.173317		0.1832			-0.29878
AAEL000954	conserved hypothetical protein	D					ENSANGP00000015689 [Anopheles gambiae str. PEST]	Ankyrin;Dpy-30
AAEL000955	conserved hypothetical protein	D				GO:0007582	ENSANGP00000015092 [Anopheles gambiae str. PEST]	Autophagocytosis associated protein, N-terminal;Autophagocytosis associated protein, C-terminal	physiological process			0.0691587	-0.205127	-0.341921		-0.110651	-0.0635437		-0.0479181	0.143077	-0.288611	-0.263268	-0.0691587	-0.208106	-0.311199		-0.348607
AAEL000956	conserved hypothetical protein	D				GO:0005515,GO:0007242,GO:0035091	ENSANGP00000015736 [Anopheles gambiae str. PEST]	Phox-like	protein binding
AAEL000957	hypothetical protein	D					ENSANGP00000027364 [Anopheles gambiae str. PEST]	CD9/CD37/CD63 antigen
AAEL000958	conserved hypothetical protein	U					IP15859p [Drosophila melanogaster]						0.179911		-0.109378	-0.320768		-0.133028	-0.286287	-0.696805	-0.384253	-0.431664		-0.638559	-0.291681	-0.375272	-0.50434
AAEL000959	arginine or creatine kinase	D				GO:0016301,GO:0016772	ENSANGP00000028252 [Anopheles gambiae str. PEST]	ATP:guanido phosphotransferase	kinase activity;transferase activity\, transferring phosphorus-containing groups
AAEL000960	conserved hypothetical protein	D				GO:0005179,GO:0005576,GO:0007582	insulin-like peptide 6 precursor [Anopheles gambiae]	Insulin/IGF/relaxin	hormone activity;extracellular region;physiological process
AAEL000961	conserved hypothetical protein	D				GO:0005515,GO:0006355,GO:0008270	ENSANGP00000021179 [Anopheles gambiae str. PEST]		protein binding;regulation of transcription\, DNA-dependent;zinc ion binding											0.36244	0.760321	0.435101		0.855882	0.214833	0.397445	0.189098
AAEL000962	conserved hypothetical protein	D					ENSANGP00000021268 [Anopheles gambiae str. PEST]	Integrins alpha chain
AAEL000963	conserved hypothetical protein	U					ENSANGP00000016988 [Anopheles gambiae str. PEST]					0.663112	0.166852	0.740886	0.703713	0.647318	0.633395	0.82889	0.243162	0.77447		0.514639	0.127436	0.795801	0.708221	0.808334
AAEL000964	regulatory factor X-associated ankyrin-containing protein, putative	D					ENSANGP00000028376 [Anopheles gambiae str. PEST]	Ankyrin						-0.0676585	-0.190828		-0.276032		-0.101032			-0.288104		-0.286582			-0.240086
AAEL000965	conserved hypothetical protein	D					ENSANGP00000017958 [Anopheles gambiae str. PEST]	NHL repeat;Thioredoxin domain 2				-0.222888	-0.649492	-0.460474	-0.29918	-0.331824	-0.524913	-0.64004	-0.572057		-0.475938		0.222888		-0.109391	-0.272517	-0.510292
AAEL000966	hypothetical protein	U					PREDICTED: similar to CG4050-PA, isoform A [Apis mellifera]
AAEL000967	tmc7 protein	D				GO:0016021	ENSANGP00000015729 [Anopheles gambiae str. PEST]	TMC;Prolinech region	integral to membrane
AAEL000968	hypothetical protein	U					merozoite surface protein-9 [Plasmodium coatneyi]
AAEL000969	hypothetical protein	U					hypothetical protein, conserved [Leishmania major]						-0.504384				-0.349238
AAEL000970	predicted protein	U					Trithorax-like CG33261-PE, isoform E [Drosophila melanogaster]	Zinc finger, C2H2-type;BTB/POZ;BTB
AAEL000971	smile protein	D				GO:0005622,GO:0016740,GO:0043234	PREDICTED: similar to CG4050-PA, isoform A [Apis mellifera]	Calcium-binding EF-hand;Tetratricopeptide TPR_1;Tetratricopeptide TPR_2;Tetratricopeptide region	intracellular;transferase activity;protein complex
AAEL000972	conserved hypothetical protein	D					ENSANGP00000015850 [Anopheles gambiae str. PEST]	Ankyrin;Dpy-30
AAEL000973	conserved hypothetical protein	D				GO:0005179,GO:0005576,GO:0007582	insulin-like peptide 2 precursor [Anopheles gambiae]	Phosphopantetheine attachment site;Insulin/IGF/relaxin	hormone activity;extracellular region;physiological process											-0.305092	-0.236417	-0.524315	-0.579935	-0.358908	-0.651919	-0.219852	-0.359288
AAEL000974	zinc finger protein	D				GO:0003676,GO:0005488,GO:0005634,GO:0006350,GO:0006950,GO:0007275,GO:0007582,GO:0008283,GO:0009628,GO:0009653,GO:0030528,GO:0050789	PREDICTED: similar to Zinc finger protein 74 [Danio rerio]	Zinc finger, C2H2-type	nucleic acid binding;binding;nucleus;transcription;response to stress;development;physiological process;cell proliferation;response to abiotic stimulus;morphogenesis;transcription regulator activity;regulation of biological process
AAEL000975	hypothetical protein	D					Ring finger protein (C3HC4 type) 8 [Danio rerio]
AAEL000976	nucleoprotein, putative	D				GO:0019013			viral nucleocapsid
AAEL000977	hypothetical protein	U					hypothetical protein Chro.40419 [Cryptosporidium hominis TU502]													0.115577		-0.256281			-0.208587	0.218961	-0.209837
AAEL000978	conserved hypothetical protein	D				GO:0005634	ENSANGP00000002042 [Anopheles gambiae str. PEST]	NUC153;Bipartite nuclear localization signal	nucleus
AAEL000979	hypothetical protein	D					putative 3-oxoacyl-[acyl-carrier-protein] synthase synthase [Escherichia coli O157:H7 str. Sakai]
AAEL000980	hypothetical protein	D				GO:0003676,GO:0005634,GO:0008270	ZNF85 protein [Homo sapiens]	Zinc finger, C2H2-type;Zinc finger, C2H2-subtype	nucleic acid binding;nucleus;zinc ion binding
AAEL000981	hypothetical protein	U					ENSANGP00000028449 [Anopheles gambiae str. PEST]
AAEL000982	mediator complex, subunit, putative	RTT				GO:0005515,GO:0005634,GO:0005654,GO:0006350,GO:0030528,GO:0043234,GO:0050789	ENSANGP00000016924 [Anopheles gambiae str. PEST]	MED7	protein binding;nucleus;nucleoplasm;transcription;transcription regulator activity;protein complex;regulation of biological process			0.106794	0.201884	0.150656	0.0588936	0.232589		0.167756	0.168717		0.157081	0.112342	-0.106794	0.297857	0.211722		-0.0453781
AAEL000983	clathrin coat assembly protein ap19	TRP				GO:0005578,GO:0006810,GO:0006886,GO:0007267,GO:0015031,GO:0016023,GO:0016043,GO:0030125			extracellular matrix (sensu Metazoa)			-0.32185	-0.72604	0.243496	-0.142687	0.0828589	-0.668143	-0.125465	0.638235	0.0584599		-0.213743	0.223699		0.240802	-0.152644	-0.0654372
AAEL000984	conserved hypothetical protein	D				GO:0004872,GO:0005623,GO:0005634,GO:0007010,GO:0007049,GO:0007165,GO:0007275,GO:0007582,GO:0009653,GO:0009790,GO:0016043,GO:0019538,GO:0030154,GO:0030234,GO:0050789	pebble CG8114-PB, isoform B [Drosophila melanogaster]	BRCT;DH	receptor activity;cell;nucleus;cytoskeleton organization and biogenesis;cell cycle;signal transduction;development;physiological process;morphogenesis;embryonic development;cell organization and biogenesis;protein metabolism;cell differentiation;enzyme re											0.483784	0.655574	0.628949		0.718616	0.414825	0.391728
AAEL000985	conserved hypothetical protein	U					CG32177-PA [Drosophila melanogaster]					-0.152966	-0.0991824	-0.248965	-0.212261	-0.310835	-0.251474	-0.280185	-0.255361	-0.201904	0.120045	0.0747758	0.152966	0.236554		-0.280825	0.0688908
AAEL000986	NADH-ubiquinone oxidoreductase ashi subunit	REDOX/STRESS/MIT				GO:0003824,GO:0005489,GO:0005739,GO:0006118,GO:0043234	ENSANGP00000015498 [Anopheles gambiae str. PEST]	NADH-ubiquinone oxidoreductase ASHI subunit	catalytic activity			1.18542	2.63689	1.34988	1.22846	1.13053	0.898946	0.604759	0.0841581	3.22396	1.81552	1.84547	1.51197	1.40843	1.15243	0.896326	1.20939
AAEL000987	60S ribosomal protein L8	RTT				GO:0003723,GO:0005198,GO:0005829,GO:0005840,GO:0006412	60S ribosomal protein L8	Ribosomal protein L2	RNA binding;structural molecule activity;cytosol;ribosome;protein biosynthesis			0.437249	0.105813	0.224654	0.374738	0.264466	0.420001	0.35857	0.0446967	-0.120155	-0.180532	-0.487478	-0.360944	-0.22454	-0.581879	-0.0591575	-0.607408
AAEL000988	conserved hypothetical protein	D				GO:0003824,GO:0006464	ENSANGP00000013381 [Anopheles gambiae str. PEST]	Tubulin-tyrosine ligase	catalytic activity;protein modification					0.120034	-0.321012		-0.188694	-0.254623	-0.591883	-0.131905						-0.356884	-0.689664
AAEL000989	hypothetical protein	U					PREDICTED: similar to x 009 protein [Gallus gallus]
AAEL000990	conserved hypothetical protein	D				GO:0003677,GO:0006350,GO:0007049,GO:0008219,GO:0008233,GO:0016740,GO:0019538,GO:0050789	LD24232p [Drosophila melanogaster]	Zinc finger, PHD-type	DNA binding;transcription;cell cycle;cell death;peptidase activity;transferase activity;protein metabolism;regulation of biological process
AAEL000991	conserved hypothetical protein	D				GO:0019013	nucleoprotein N [Bovine ephemeral fever virus]		viral nucleocapsid															0.275535
AAEL000992	hypothetical protein	U					ENSANGP00000004437 [Anopheles gambiae str. PEST]
AAEL000993	dally	D				GO:0005198,GO:0005576,GO:0005578,GO:0005886,GO:0007049,GO:0007165,GO:0007275,GO:0050789	ENSANGP00000010385 [Anopheles gambiae str. PEST]	Glypican	structural molecule activity;extracellular region;extracellular matrix (sensu Metazoa);plasma membrane;cell cycle;signal transduction;development;regulation of biological process												-0.157639	-0.125471		-0.140561
AAEL000994	conserved hypothetical protein	D					ENSANGP00000010347 [Anopheles gambiae str. PEST]	Neuropeptide Y2 receptor
AAEL000995	hypothetical protein	U											-0.0960249							-1.12651	1.49409	-1.44243		-1.17478	-1.17002
AAEL000996	conserved hypothetical protein	D				GO:0003676	ENSANGP00000017807 [Anopheles gambiae str. PEST]	PAP/25A-associated;PAP/25A core	nucleic acid binding				0.574009	0.271322		0.161731	0.184649	0.30447	0.395791		0.269261	-0.077838				0.148883
AAEL000997	nucleoprotein, putative	D				GO:0019013			viral nucleocapsid
AAEL000998	galactose-specific C-type lectin, putative	I
AAEL000999	DNA replication licensing factor MCM7	RTT				GO:0000166,GO:0003677,GO:0003682,GO:0003824,GO:0005654,GO:0006259,GO:0006996,GO:0016787,GO:0043234	ENSANGP00000010410 [Anopheles gambiae str. PEST]	MCM;MCM protein 7;MCM protein 4;ATPase associated with various cellular activities, AAA-5	nucleotide binding;DNA binding;chromatin binding;catalytic activity;nucleoplasm;DNA metabolism;organelle organization and biogenesis;hydrolase activity;protein complex											0.860199	0.188362	0.401463		0.31053		0.647307	0.426132
AAEL001000	1-acyl-sn-glycerol-3-phosphate acyltransferase	M				GO:0005623,GO:0006629,GO:0009058,GO:0016740	ENSANGP00000011242 [Anopheles gambiae str. PEST]	Phospholipid/glycerol acyltransferase	cell;lipid metabolism;biosynthesis;transferase activity
AAEL001001	hypothetical protein	U					WD40 repeat-containing protein [Dictyostelium discoideum]												-0.132696			-0.258087	-0.356859		0.302202	-0.24259	-0.352094
AAEL001002	sodium/solute symporter	TRP				GO:0005215,GO:0005623,GO:0006810,GO:0006811,GO:0008152,GO:0019538	CG5687-PA [Drosophila melanogaster]	Glycoside hydrolase, family 5;Na+/solute symporter	transporter activity;cell;transport;ion transport;metabolism;protein metabolism
AAEL001003	nucleoprotein, putative	D				GO:0019013	nucleoprotein N [Bovine ephemeral fever virus]		viral nucleocapsid
AAEL001004	conserved hypothetical protein	U					ENSANGP00000011239 [Anopheles gambiae str. PEST]					0.131295	0.239184	0.317664	0.302017	0.127212	0.431179	0.257247	0.556776	0.586269		0.244591	-0.131295	0.131874	0.158006	0.708049	0.128467
AAEL001005	calreticulin	TRP				GO:0005509,GO:0005515,GO:0006810,GO:0015031,GO:0016043,GO:0019538		Endoplasmic reticulum targeting sequence;Calreticulin/calnexin	calcium ion binding;protein binding;transport;protein transport;cell organization and biogenesis;protein metabolism			0.611297	0.176064	0.205797					0.457719	0.501067	0.472222	0.408814	0.505334	0.351262	0.477391	0.605727	0.293884
AAEL001006	conserved hypothetical protein	U					ENSANGP00000011239 [Anopheles gambiae str. PEST]
AAEL001007	conserved hypothetical protein	D				GO:0003723,GO:0005215,GO:0005635,GO:0005654,GO:0006810,GO:0007610,GO:0015031,GO:0016043	ENSANGP00000013456 [Anopheles gambiae str. PEST]	Nuclear transport factor 2;TAP, C-terminal	RNA binding;transporter activity;nuclear envelope;nucleoplasm;transport;behavior;protein transport;cell organization and biogenesis
AAEL001008	conserved hypothetical protein	D				GO:0003676,GO:0003677,GO:0005488,GO:0005634,GO:0006139,GO:0006350,GO:0008283,GO:0030528,GO:0050789	RE33093p [Drosophila melanogaster]	Zinc finger, C2H2-type;Zinc finger, C2H2-subtype	nucleic acid binding;DNA binding;binding;nucleus;nucleobase\, nucleoside\, nucleotide and nucleic acid metabolism;transcription;cell proliferation;transcription regulator activity;regulation of biological process										0.603627								-0.177058
AAEL001009	dab2-interacting protein	D				GO:0004871,GO:0005102,GO:0005515	ENSANGP00000012848 [Anopheles gambiae str. PEST]	Neutrophil cytosol factor 2;Src homology-3;Variant SH3	signal transducer activity;receptor binding;protein binding
AAEL001010	defective proboscis extension response, putative	I					ENSANGP00000018563 [Anopheles gambiae str. PEST]	Immunoglobulin V-set;Immunoglobulin;Immunoglobulin-like
AAEL001011	conserved hypothetical protein	U					ENSANGP00000010344 [Anopheles gambiae str. PEST]	Protein of unknown function DUF1625
AAEL001012	hypothetical protein	U					hypothetical protein JNB_04665 [Janibacter sp. HTCC2649]
AAEL001013	conserved hypothetical protein	D					ENSANGP00000012869 [Anopheles gambiae str. PEST]	Adrenomedullin				0.0495327	0.077155	-0.196501				0.180427	-0.231179	-0.359589			-0.199131		-0.232123		-0.0947775
AAEL001014	vacuolar protein sorting-associated	D				GO:0003700,GO:0005622,GO:0006118,GO:0006350,GO:0006810,GO:0006996,GO:0015031,GO:0016043,GO:0050789	ENSANGP00000014333 [Anopheles gambiae str. PEST]	Sec1-like protein	transcription factor activity;intracellular;electron transport;transcription;transport;organelle organization and biogenesis;protein transport;cell organization and biogenesis;regulation of biological process			-0.174984	-0.395562	-0.123402	-0.428983	-0.30909	-0.303339	-0.301879		-0.000164866	0.179583	-0.0952466	0.272295	0.250103	0.086061	0.242241	0.0618066
AAEL001015	conserved hypothetical protein	U					ENSANGP00000025496 [Anopheles gambiae str. PEST]														0.278617
AAEL001016	zinc finger protein	D				GO:0003676,GO:0005488,GO:0005634,GO:0006139,GO:0006350,GO:0008283,GO:0030528,GO:0050789	ENSANGP00000002806 [Anopheles gambiae str. PEST]	Zinc finger, C2H2-type;Zinc finger, C2H2-subtype;Zinc finger, AD-type	nucleic acid binding;binding;nucleus;nucleobase\, nucleoside\, nucleotide and nucleic acid metabolism;transcription;cell proliferation;transcription regulator activity;regulation of biological process
AAEL001017	tyrosine-protein kinase	D				GO:0000166,GO:0004672,GO:0006464,GO:0007165,GO:0040007,GO:0050789	ENSANGP00000014190 [Anopheles gambiae str. PEST]	Protein kinase;Tyrosine protein kinase, active site;Tyrosine protein kinase;SH2 motif	nucleotide binding;protein kinase activity;protein modification;signal transduction;growth;regulation of biological process
AAEL001018	conserved hypothetical protein	D				GO:0005576,GO:0007165	ENSANGP00000002915 [Anopheles gambiae str. PEST]	Immunoglobulin V-set;Immunoglobulin;Immunoglobulin I-set;Fibronectin, type III;Immunoglobulin-like	extracellular region;signal transduction
AAEL001019	translation elongation factor	RTT				GO:0000166,GO:0005737,GO:0006412,GO:0008135,GO:0043234	ENSANGP00000017548 [Anopheles gambiae str. PEST]	Protein synthesis factor, GTP-binding;Elongation factor Tu, domain 2	nucleotide binding;cytoplasm;protein biosynthesis;translation factor activity\, nucleic acid binding;protein complex
AAEL001020	anterior fat body protein	D				GO:0007165,GO:0007275	ENSANGP00000011757 [Anopheles gambiae str. PEST]	Senescence marker protein-30 (SMP-30)	signal transduction;development				0.887148		0.506115	0.392562	0.393068	0.296826	1.03926	-0.581433		-0.427985		-0.338219	-0.208009	-0.25727
AAEL001021	conserved hypothetical protein	CS				GO:0005576,GO:0006030,GO:0008061	CG7874-PA [Drosophila melanogaster]	Chitin binding Peritrophin-A	extracellular region;chitin metabolism;chitin binding
AAEL001022	anterior fat body protein	D				GO:0005509,GO:0006118,GO:0007165,GO:0007275			calcium ion binding			-0.866805	1.17918	0.419335	0.460481	0.216445	0.236319	0.132877	1.04526	-1.02128	-0.417352	-0.762236	0.334364	-0.857069	-0.685053	-0.548949	-0.246186
AAEL001023	p15-2b protein, putative	D				GO:0005215,GO:0005622,GO:0006810	ENSANGP00000011961 [Anopheles gambiae str. PEST]	Nuclear transport factor 2	transporter activity;intracellular;transport
AAEL001024	mitochondrial carrier protein	REDOX/STRESS/MIT				GO:0005215,GO:0005488,GO:0005739,GO:0006810	ENSANGP00000021756 [Anopheles gambiae str. PEST]	Mitochondrial substrate carrier	transporter activity;binding;mitochondrion;transport				0.113256	-0.0970985	0.108009		0.381611		-0.260957	0.202323	0.271815	0.25201			0.199106	0.268083
AAEL001025	conserved hypothetical protein	D					ENSANGP00000025486 [Anopheles gambiae str. PEST]	Immunoglobulin V-set;Immunoglobulin;Immunoglobulin I-set;Fibronectin, type III;Immunoglobulin-like
AAEL001026	conserved hypothetical protein	U					ENSANGP00000019822 [Anopheles gambiae str. PEST]
AAEL001027	hypothetical protein	U					similar to AAA ATPase containing von Willebrand factor type A (vWA) domain [Magnetococcus sp. MC-1]
AAEL001028	hypothetical protein	CS				GO:0005576,GO:0006030,GO:0008061	CG7874-PA [Drosophila melanogaster]	Chitin binding Peritrophin-A	extracellular region;chitin metabolism;chitin binding
AAEL001029	conserved hypothetical protein	D				GO:0005215,GO:0005635,GO:0006810,GO:0016043,GO:0043234	ENSANGP00000012445 [Anopheles gambiae str. PEST]	Antifreeze protein, type I;Orphan nuclear receptor, NOR1 type;Pollen allergen Poa pIX/Phl pVI, C-terminal	transporter activity;nuclear envelope;transport;cell organization and biogenesis;protein complex			-0.132695			0.0864687			-0.0996834	-0.136621	-0.0121144	0.171401	0.390391	0.132959	0.621678		0.312148	0.337684
AAEL001030	S-formylglutathione hydrolase, putative	D				GO:0016787	ENSANGP00000010587 [Anopheles gambiae str. PEST]	Putative esterase;Esterase/lipase/thioesterase	hydrolase activity
AAEL001031	conserved hypothetical protein	PROT					ENSANGP00000014841 [Anopheles gambiae str. PEST]	Peptidase S1A, chymotrypsin;Peptidase S1 and S6, chymotrypsin/Hap													0.207442	0.6105		0.236841
AAEL001032	conserved hypothetical protein	U					ENSANGP00000025590 [Anopheles gambiae str. PEST]						0.269606	-0.102716	-0.0843825	0.122019		0.287031	0.224273	-0.0925594	0.490806	0.453238		0.719099	0.168503	0.360222	0.260573
AAEL001033	methyl-cpg binding protein, mbd	D				GO:0000166,GO:0003677,GO:0005515,GO:0005634,GO:0005654,GO:0005694,GO:0006350,GO:0007275,GO:0030528,GO:0043234,GO:0050789	ENSANGP00000023168 [Anopheles gambiae str. PEST]	Methyl-CpG binding	nucleotide binding;DNA binding;protein binding;nucleus;nucleoplasm;chromosome;transcription;development;transcription regulator activity;protein complex;regulation of biological process
AAEL001034	adenylate cyclase type vi	D				GO:0000003,GO:0003824,GO:0005886,GO:0006139,GO:0007165,GO:0007267,GO:0007582,GO:0007610,GO:0009058,GO:0009628	ENSANGP00000017563 [Anopheles gambiae str. PEST]	Adenylyl cyclase class-3/4/guanylyl cyclase;Adenylate cyclase-like	reproduction;catalytic activity;plasma membrane;nucleobase\, nucleoside\, nucleotide and nucleic acid metabolism;signal transduction;cell-cell signaling;physiological process;behavior;biosynthesis;response to abiotic stimulus
AAEL001035	anterior fat body protein	D				GO:0005509,GO:0006118,GO:0007165,GO:0007275	ENSANGP00000011757 [Anopheles gambiae str. PEST]	Senescence marker protein-30 (SMP-30)	calcium ion binding;electron transport;signal transduction;development
AAEL001036	ikappab kinase complex-associated protein	I				GO:0007165,GO:0007582,GO:0009607,GO:0015031,GO:0016043,GO:0030234	ENSANGP00000014249 [Anopheles gambiae str. PEST]	IKI3	signal transduction;physiological process;response to biotic stimulus;protein transport;cell organization and biogenesis;enzyme regulator activity			0.0845804	-0.083705	-0.179199	-0.252244	-0.225825	-0.286761	-0.151201	-0.250246	-0.113399	0.21239	-0.196444	-0.103359	0.106045	-0.16071	-0.110377	0.0998311
AAEL001037	ribosomal RNA methyltransferase	RTT				GO:0003676,GO:0005730,GO:0006139,GO:0006996,GO:0007028,GO:0016740	LD23718p [Drosophila melanogaster]	Ribosomal RNA methyltransferase RrmJ/FtsJ;Spb1, C-terminal	nucleic acid binding;nucleolus;nucleobase\, nucleoside\, nucleotide and nucleic acid metabolism;organelle organization and biogenesis;cytoplasm organization and biogenesis;transferase activity			0.305048	0.18156		0.150491			0.107078	-0.222357	0.260554	0.534401	0.2271	-0.10709			0.11993	-0.122915
AAEL001038	cak1	D				GO:0000166,GO:0004672,GO:0004871,GO:0005654,GO:0006350,GO:0006464,GO:0007049,GO:0030528,GO:0043234,GO:0050789	ENSANGP00000002848 [Anopheles gambiae str. PEST]	Protein kinase	nucleotide binding;protein kinase activity;signal transducer activity;nucleoplasm;transcription;protein modification;cell cycle;transcription regulator activity;protein complex;regulation of biological process				-0.249191		-0.142767		-0.160452			-0.208881		-0.834439		-0.048597		-0.157105	-0.682349
AAEL001039	metaxin	D				GO:0005215,GO:0005739,GO:0006810,GO:0009790,GO:0015031,GO:0016043			transporter activity			0.374676	0.207886	0.250466	-0.27728	-0.50985		-0.0231704	0.405215	0.205471	-0.183034	-0.228858	-0.337337	-0.701035	-0.296365	-0.226846	-0.0685205
AAEL001040	hypothetical protein	D				GO:0005515,GO:0006355,GO:0008270			protein binding;regulation of transcription\, DNA-dependent;zinc ion binding
AAEL001041	guanine nucleotide-binding protein beta 3 (g protein beta3)	D				GO:0004871,GO:0005886,GO:0007010,GO:0007165,GO:0007582,GO:0016787,GO:0030154,GO:0043234	ENSANGP00000014177 [Anopheles gambiae str. PEST]	WD-40 repeat;G-protein, beta subunit	signal transducer activity;plasma membrane;cytoskeleton organization and biogenesis;signal transduction;physiological process;hydrolase activity;cell differentiation;protein complex				-0.101605	-0.302298	-0.113737	-0.216053	-0.198251										-0.384716
AAEL001042	hypothetical protein	CS				GO:0005576,GO:0006030,GO:0008061	CG7874-PA [Drosophila melanogaster]	Chitin binding Peritrophin-A	extracellular region;chitin metabolism;chitin binding
AAEL001043	hypothetical protein	U					hypothetical protein DSM3645_18436 [Blastopirellula marina DSM 3645]
AAEL001044	tyrosyl-tRNA synthetase	D				GO:0000166,GO:0003676,GO:0003723,GO:0003824,GO:0006139,GO:0006412,GO:0006519	ENSANGP00000018288 [Anopheles gambiae str. PEST]	Tyrosyl-tRNA synthetase, class Ib;Aminoacyl-tRNA synthetase, class Ib;tA-binding region	nucleotide binding;nucleic acid binding;RNA binding;catalytic activity;nucleobase\, nucleoside\, nucleotide and nucleic acid metabolism;protein biosynthesis;amino acid and derivative metabolism			0.232614	0.91432	0.390598	0.0423861	0.362321	0.478351	0.448046	0.575052	0.171782	1.21135		-0.232614	0.283751	0.584108	0.473066	0.392959
AAEL001045	hypothetical protein	U					ENSANGP00000027589 [Anopheles gambiae str. PEST]						-0.57916
AAEL001046	protein-tryrosine phosphatase	D				GO:0004721,GO:0004872,GO:0006464,GO:0007165	ENSANGP00000014350 [Anopheles gambiae str. PEST]	Tyrosine specific protein phosphatase and dual specificity protein phosphatase;Tyrosine specific protein phosphatase	phosphoprotein phosphatase activity;receptor activity;protein modification;signal transduction
AAEL001047	adenylate cyclase	D				GO:0003824,GO:0005623,GO:0006139,GO:0007165,GO:0009058	ENSANGP00000024908 [Anopheles gambiae str. PEST]	Tetracycline resistance protein;Major facilitator superfamily MFS_1	catalytic activity;cell;nucleobase\, nucleoside\, nucleotide and nucleic acid metabolism;signal transduction;biosynthesis												1.11439	1.40617	1.66174	1.07781	0.983512
AAEL001048	short-chain dehydrogenase	REDOX/STRESS/MIT				GO:0003824,GO:0008152	ENSANGP00000014198 [Anopheles gambiae str. PEST]	Short-chain dehydrogenase/reductase SDR;Glucose/ribitol dehydrogenase;2,3-dihydro-2,3-dihydroxybenzoate dehydrogenase;Insect alcohol dehydrogenase family	catalytic activity;metabolism					0.332025				0.274807	0.374522	-0.214647	0.261245	0.338614		0.214501			0.38955
AAEL001049	conserved hypothetical protein	U					ENSANGP00000027229 [Anopheles gambiae str. PEST]
AAEL001050	conserved hypothetical protein	D					ENSANGP00000017650 [Anopheles gambiae str. PEST]	Zinc finger, MYND-type
AAEL001051	conserved hypothetical protein	U
AAEL001052	heat shock protein, putative	REDOX/STRESS/MIT				GO:0005524,GO:0006457	ENSANGP00000011747 [Anopheles gambiae str. PEST]	Chaperonin Cpn10	ATP binding;protein folding			-0.127473	-0.197318	0.296697	-0.264319		-0.472816		0.229289	-0.104035	-0.117264	0.321714	0.213446	0.2471	0.172551		-0.0795165
AAEL001053	hypothetical protein	U					TPR [Xenopus laevis]
AAEL001054	glutathione-s-transferase theta, gst	REDOX/STRESS/MIT				GO:0009607,GO:0009628,GO:0016740		Glutathione S-transferase, N-terminal;Glutathione S-transferase, C-terminal	response to biotic stimulus;response to abiotic stimulus;transferase activity
AAEL001055	conserved hypothetical protein	U
AAEL001056	hypothetical protein	D					PREDICTED: similar to Hypoxia-inducible factor 1 alpha (HIF-1 alpha) (HIF1 alpha) (ARNT interacting protein) [Apis mellifera]
AAEL001057	lipase	M				GO:0003824,GO:0006629	putative salivary lipase [Culex pipiens quinquefasciatus]	Lipase, active site;Lipase;Esterase/lipase/thioesterase	catalytic activity;lipid metabolism
AAEL001058	jun activation domain binding protein	D				GO:0000003,GO:0003824,GO:0005634,GO:0005737,GO:0006350,GO:0006464,GO:0007275,GO:0007582,GO:0009653,GO:0016043,GO:0030154,GO:0030528,GO:0043234			reproduction;catalytic activity;nucleus;cytoplasm;transcription;protein modification;development;physiological process;morphogenesis;cell organization and biogenesis;cell differentiation;transcription regulator activity;protein complex			-0.146929	-0.402923	-0.524374	-0.444792	-0.635466	-0.745498	-0.385008	-0.170016	-0.294861	-0.358944	-0.653573	-0.0130332	-0.608676	-0.599381	-0.382755	-0.0554102
AAEL001059	GSTD1-6 protein, putative	D					ENSANGP00000013058 [Anopheles gambiae str. PEST]	Glutathione S-transferase, N-terminal;Glutathione S-transferase, C-terminal
AAEL001060	conserved hypothetical protein	D					ENSANGP00000021010 [Anopheles gambiae str. PEST]	EGF-like region;EGF-like, type 3
AAEL001061	glutathione-s-transferase theta, gst	REDOX/STRESS/MIT				GO:0009607,GO:0009628,GO:0016740	ENSANGP00000023508 [Anopheles gambiae str. PEST]	Glutathione S-transferase, N-terminal;Glutathione S-transferase, C-terminal	response to biotic stimulus;response to abiotic stimulus;transferase activity			-0.289537	0.742199	0.287914	1.78603			0.51787		0.280412	0.147841	-0.30922		-0.29705	-0.186116	0.296404	-0.319809
AAEL001062	hypothetical protein	U					CG16791-PA [Drosophila melanogaster]
AAEL001063	hypothetical protein	U					rhoptry protein [Plasmodium yoelii yoelii str. 17XNL]
AAEL001064	triacylglycerol lipase, putative	M				GO:0003824,GO:0006629	putative salivary lipase [Culex pipiens quinquefasciatus]	Lipase, active site;Lipase;Esterase/lipase/thioesterase	catalytic activity;lipid metabolism
AAEL001065	conserved hypothetical protein	U					IP06461p [Drosophila melanogaster]					-0.679203	-0.751631	-0.438352	-0.708869	-0.519763	-0.999467	0.0543351	-0.100898								-0.210562
AAEL001066	mitochondrial ribosomal protein, L22, putative	REDOX/STRESS/MIT				GO:0005198,GO:0005739,GO:0005840,GO:0006412	mitochondrial ribosomal protein L22 CG4742-PA [Drosophila melanogaster]		structural molecule activity;mitochondrion;ribosome;protein biosynthesis			-0.128352	0.0427765	0.247274	-0.152061	-0.469694	-0.567709	-0.384645	-0.408166	-0.0433747	-0.17233	-0.29006	-0.134838	-0.508466	-0.651742	-0.431997	-0.844295
AAEL001067	hypothetical protein	U
AAEL001068	myosin light chain 2V, putative	CS				GO:0005509	ENSANGP00000011267 [Anopheles gambiae str. PEST]		calcium ion binding											-0.531601	-1.39089	-0.295396		-0.892767	-1.31684	-0.892574	-0.779811
AAEL001069	histone deacetylase	M				GO:0003682,GO:0006259,GO:0006350,GO:0006464,GO:0006996,GO:0007049,GO:0016787,GO:0050789	ENSANGP00000007396 [Anopheles gambiae str. PEST]	Histone deacetylase superfamily;Zinc finger, UBP-type	chromatin binding;DNA metabolism;transcription;protein modification;organelle organization and biogenesis;cell cycle;hydrolase activity;regulation of biological process
AAEL001070	conserved hypothetical protein	U					ENSANGP00000018826 [Anopheles gambiae str. PEST]
AAEL001071	glutathione-s-transferase theta, gst	REDOX/STRESS/MIT				GO:0009607,GO:0009628,GO:0016740	ENSANGP00000024808 [Anopheles gambiae str. PEST]	Glutathione S-transferase, N-terminal;Glutathione S-transferase, C-terminal	response to biotic stimulus;response to abiotic stimulus;transferase activity
AAEL001072	lipase	M				GO:0006629,GO:0016787			lipid metabolism;hydrolase activity
AAEL001073	malic enzyme	D				GO:0003824,GO:0005739,GO:0005975,GO:0006091,GO:0008152,GO:0009056	ENSANGP00000011712 [Anopheles gambiae str. PEST]	Malic oxidoreductase;Malic enzyme, N-terminal;Malic enzyme, NAD-binding	catalytic activity;mitochondrion;carbohydrate metabolism;generation of precursor metabolites and energy;metabolism;catabolism
AAEL001074	cadherin	CS				GO:0003723,GO:0005509,GO:0005623,GO:0005886,GO:0007165	ENSANGP00000011254 [Anopheles gambiae str. PEST]	Cadherin	RNA binding;calcium ion binding;cell;plasma membrane;signal transduction
AAEL001075	conserved hypothetical protein	D					ENSANGP00000027485 [Anopheles gambiae str. PEST]	CUB;Low density lipoproteinceptor, class A
AAEL001076	lipase	M				GO:0003824,GO:0006629	putative salivary lipase [Culex pipiens quinquefasciatus]	Lipase, active site;Lipase;Esterase/lipase/thioesterase	catalytic activity;lipid metabolism
AAEL001077	conserved hypothetical protein	I				GO:0004252,GO:0006508	ENSANGP00000020324 [Anopheles gambiae str. PEST]	Peptidase S1 and S6, chymotrypsin/Hap;Peptidase S1A, chymotrypsin	serine-type endopeptidase activity;proteolysis												-0.388994	-0.227318		-0.389638		-0.326659
AAEL001078	glutathione-s-transferase theta, gst	REDOX/STRESS/MIT				GO:0003824,GO:0009607,GO:0009628,GO:0016209,GO:0016740	glutathione transferase GST1-4 [Anopheles dirus]	Glutathione S-transferase, N-terminal;Glutathione S-transferase, C-terminal	catalytic activity;response to biotic stimulus;response to abiotic stimulus;antioxidant activity;transferase activity
AAEL001079	fgf receptor activating protein	D				GO:0007165,GO:0008283	ENSANGP00000019385 [Anopheles gambiae str. PEST]		signal transduction;cell proliferation
AAEL001080	RNA 3' terminal phosphate cyclase	RTT				GO:0003723,GO:0003824,GO:0005634,GO:0006139	ENSANGP00000020525 [Anopheles gambiae str. PEST]	RNA 3'-terminal phosphate cyclase	RNA binding;catalytic activity;nucleus;nucleobase\, nucleoside\, nucleotide and nucleic acid metabolism			-0.125952	-0.392249	-1.76272	-0.680138	-1.58635	-1.96615	-0.853446	-0.48238	-0.468675		-1.99075	-0.228554	-1.34937	-1.75998	-0.950341	-0.455911
AAEL001081	triacylglycerol lipase, putative	M				GO:0003824,GO:0006629	putative salivary lipase [Culex pipiens quinquefasciatus]	Lipase, active site;Lipase;Esterase/lipase/thioesterase	catalytic activity;lipid metabolism
AAEL001082	conserved hypothetical protein	U					ENSANGP00000011703 [Anopheles gambiae str. PEST]														0.36131	2.31717	0.905698	0.341081	0.347666		1.74566
AAEL001083	conserved hypothetical protein	U
AAEL001084	conserved hypothetical protein	I				GO:0004252,GO:0006508	ENSANGP00000012642 [Anopheles gambiae str. PEST]	Peptidase S1 and S6, chymotrypsin/Hap;Peptidase S1A, chymotrypsin	serine-type endopeptidase activity;proteolysis
AAEL001085	conserved hypothetical protein	U					ENSANGP00000023760 [Anopheles gambiae str. PEST]	CHCH					0.403908	0.383626					0.219426	-0.091444	0.248275	0.213802		0.0951532			-0.126028
AAEL001086	hypothetical protein	D				GO:0005634,GO:0008270	unnamed protein product [Candida glabrata CBS138]		nucleus;zinc ion binding											0.131997	0.243924	0.117924		0.310037	0.144548	0.211991	-0.153247
AAEL001087	synaptic vesicle protein	D				GO:0005215,GO:0005623,GO:0005975,GO:0006810,GO:0007267,GO:0007582	ENSANGP00000011231 [Anopheles gambiae str. PEST]	General substrate transporter;Major facilitator superfamily MFS_1;Major facilitator superfamily	transporter activity;cell;carbohydrate metabolism;transport;cell-cell signaling;physiological process											-0.505103	-0.0456446	-0.0399924	1.10496	0.499627	-0.411253	0.322134	-0.483279
AAEL001088	beta-1,3-galactosyltransferase	D				GO:0005623,GO:0006412,GO:0006464,GO:0016740	ENSANGP00000021006 [Anopheles gambiae str. PEST]	Glycosyl transferase, family 31	cell;protein biosynthesis;protein modification;transferase activity
AAEL001089	conserved hypothetical protein	U					GM02245p [Drosophila melanogaster]
AAEL001090	glutathione-s-transferase theta, gst	REDOX/STRESS/MIT				GO:0009607,GO:0009628,GO:0016740	glutathione S-transferase D7 [Anopheles gambiae]	Glutathione S-transferase, N-terminal;Glutathione S-transferase, C-terminal	response to biotic stimulus;response to abiotic stimulus;transferase activity												0.253932	-0.302556		-0.233736	0.160659	-0.170041
AAEL001091	malic enzyme	D				GO:0003824,GO:0005739,GO:0005975,GO:0006091,GO:0008152,GO:0009056	ENSANGP00000011712 [Anopheles gambiae str. PEST]	Malic oxidoreductase;Malic enzyme, N-terminal;Malic enzyme, NAD-binding	catalytic activity;mitochondrion;carbohydrate metabolism;generation of precursor metabolites and energy;metabolism;catabolism			0.58116	0.916478	1.44812	0.364206	1.09715	1.18437	0.872109	1.01018	0.946574	-0.0983679				1.11119	-0.337092	2.07227
AAEL001092	UDP-glucose pyrophosphatase	D				GO:0005488,GO:0016787	ENSANGP00000011673 [Anopheles gambiae str. PEST]	NUDIX hydrolase	binding;hydrolase activity			0.287839	-0.121178	-1.61638	-0.967466	-1.16198	-0.558011	-0.66078	-0.240226		-0.542545		-0.287839		-1.04886		-0.578841
AAEL001093	phd finger protein	U					ENSANGP00000010963 [Anopheles gambiae str. PEST]	Zinc finger, RING-type														-0.295408				-0.463286	-0.502824
AAEL001094	conserved hypothetical protein	D					ENSANGP00000020554 [Anopheles gambiae str. PEST]	Alpha crystallin;Heat shock protein Hsp20					-0.556431	0.459595	-0.207603	-0.133509	-0.386964	0.229347	0.411313	-0.294139		0.387694		-0.135454	0.154215	-0.38372	0.306084
AAEL001095	hypothetical protein	D					ENSANGP00000023140 [Anopheles gambiae str. PEST]	Cyclin-like F-box					-0.200893								2.07108	1.11991		0.375672	0.556557	1.9875	1.67016
AAEL001096	lipase	M				GO:0006629,GO:0016787	putative salivary lipase [Culex pipiens quinquefasciatus]	Lipase, active site;Lipase;Esterase/lipase/thioesterase	lipid metabolism;hydrolase activity
AAEL001097	hypoxia-inducible factor	D				GO:0003700,GO:0004871,GO:0005634,GO:0006350,GO:0007165,GO:0007275,GO:0030528,GO:0050789	ENSANGP00000011017 [Anopheles gambiae str. PEST]	Nuclear translocator;PAS;Basic helix-loop-helix dimerisation region bHLH	transcription factor activity;signal transducer activity;nucleus;transcription;signal transduction;development;transcription regulator activity;regulation of biological process
AAEL001098	clip-domain serine protease, putative	I				GO:0004252,GO:0006508	ENSANGP00000012642 [Anopheles gambiae str. PEST]	Peptidase S1 and S6, chymotrypsin/Hap;Peptidase S1A, chymotrypsin	serine-type endopeptidase activity;proteolysis					0.626389							-0.990408			-2.41524	-1.64581	-0.913339	-0.569393
AAEL001099	DEAD box polypeptide	D					lethal (1) G0060 CG3125-PB, isoform B [Drosophila melanogaster]	von Willebrand factor, type A													0.110293	0.205967				0.389817
AAEL001100	phosphoserine phosphatase	D				GO:0006519,GO:0007275,GO:0009058,GO:0009653,GO:0016043,GO:0016787,GO:0030154			amino acid and derivative metabolism			0.0373609	0.84168	0.647042	0.736978	0.721199	1.11863	-1.03184	0.82618	-0.849105	0.970057	0.360446	0.36892	1.30081	2.13777	-0.0275086	0.821139
AAEL001101	ATP-dependent transporter	TRP				GO:0000166,GO:0005215,GO:0005623,GO:0006810,GO:0016787,GO:0043234	ENSANGP00000016545 [Anopheles gambiae str. PEST]	Myb, DNA-binding;ABC transporter related;Histone H5;ATP/GTP-binding site motif A (P-loop)	nucleotide binding;transporter activity;cell;transport;hydrolase activity;protein complex				-0.35046	-0.277975	-1.09606	-0.583443	-0.800692	-0.522254	-0.80248	0.492434	0.261828		-0.573327	-0.701715	-0.507987	-0.718254	-1.00351
AAEL001102	adenosine kinase	D				GO:0005975,GO:0006139,GO:0016301	ENSANGP00000016420 [Anopheles gambiae str. PEST]	Xylose isomerase;Carbohydrate kinase, PfkB;Adenosine kinase;PfkB	carbohydrate metabolism;nucleobase\, nucleoside\, nucleotide and nucleic acid metabolism;kinase activity				-0.611361	-0.214615	-0.443328	-0.135311	0.314556	-0.251017	0.313232	-0.188822	-0.400395	-0.480379	-0.591439	-0.0527697	-0.1838	-0.256458	-0.287652
AAEL001103	prefoldin, subunit, putative	D					ENSANGP00000016422 [Anopheles gambiae str. PEST]	Prefoldin beta-like				0.821437	0.4698	0.207997	0.414742	0.425886	0.655655	0.484997	0.345558	0.9093	0.792045	0.847203	0.0141649	0.649166	0.873906	0.453643	0.879115
AAEL001104	conserved hypothetical protein	D				GO:0003779,GO:0005198,GO:0005622,GO:0007010	Hypothetical protein LOC553729 [Danio rerio]		actin binding;structural molecule activity;intracellular;cytoskeleton organization and biogenesis
AAEL001105	von Hippel-Lindau disease tumor suppressor, putative	D				GO:0005634,GO:0016567			nucleus			-0.370989	-0.831215	-0.572233	-0.859012	-0.708823	-0.42907	-0.755655	-0.240395	-0.162084	-0.330853	-0.349144	-0.437076	-0.361944	-0.220615	-0.404737	-0.375126
AAEL001106	conserved hypothetical protein	U					ENSANGP00000015649 [Anopheles gambiae str. PEST]
AAEL001107	hypothetical protein	U										-0.620729	1.50638	-0.302605		0.00224506	0.52331	0.782029		-0.431895	0.0536072	-0.340851	-0.211392	-0.265037	-0.407027	-0.335084	-0.514017
AAEL001108	protein kinase c	D				GO:0000166,GO:0004672,GO:0004871,GO:0004872,GO:0006464,GO:0007049,GO:0007165,GO:0007267,GO:0007582,GO:0008289	PREDICTED: similar to CG6622-PA, isoform A [Apis mellifera]	Protein kinase;Protein kinase C, phorbol ester/diacylglycerol binding;C2;Protein kinase, C-terminal	nucleotide binding;protein kinase activity;signal transducer activity;receptor activity;protein modification;cell cycle;signal transduction;cell-cell signaling;physiological process;lipid binding												0.453647	0.440884		-0.0710935			-0.303181
AAEL001109	glutaredoxin	D				GO:0005489,GO:0006118,GO:0045454	ENSANGP00000022155 [Anopheles gambiae str. PEST]	Glutaredoxin	electron transporter activity;electron transport;
AAEL001110	jnk stimulatory phosphatase (jsp1)	D				GO:0004721,GO:0006464,GO:0007165,GO:0016787,GO:0030234	CG10089-PD, isoform D [Drosophila melanogaster]	Dual specificity protein phosphatase;Tyrosine specific protein phosphatase and dual specificity protein phosphatase	phosphoprotein phosphatase activity;protein modification;signal transduction;hydrolase activity;enzyme regulator activity
AAEL001111	zinc finger protein	D				GO:0003676,GO:0005488,GO:0005634,GO:0006350,GO:0006950,GO:0007275,GO:0007582,GO:0008283,GO:0009628,GO:0009653,GO:0030528,GO:0050789	ENSANGP00000021337 [Anopheles gambiae str. PEST]	Zinc finger, C2H2-type;Zinc finger, C2H2-subtype	nucleic acid binding;binding;nucleus;transcription;response to stress;development;physiological process;cell proliferation;response to abiotic stimulus;morphogenesis;transcription regulator activity;regulation of biological process											0.608313	0.798171	-0.524158			0.455445		-0.469646
AAEL001112	conserved hypothetical protein	PROT				GO:0006464,GO:0008233,GO:0009056,GO:0019538	ENSANGP00000009085 [Anopheles gambiae str. PEST]	Peptidase C19, ubiquitin carboxyl-terminal hydrolase 2;Zinc finger, UBP-type;Ubiquitin-associated	protein modification;peptidase activity;catabolism;protein metabolism			-0.962343	-0.278551	-0.191102	-0.150431	-0.405454	-0.455943	-0.291146	-0.195399	-0.436048	-0.0785193	-0.243654	-0.190127	-0.281116	-0.446856	0.040343	-0.160718
AAEL001113	inorganic phosphate cotransporter, putative	TRP				GO:0005215,GO:0005623,GO:0006810,GO:0006811,GO:0008152	ENSANGP00000009081 [Anopheles gambiae str. PEST]	Major facilitator superfamily MFS_1;Major facilitator superfamily	transporter activity;cell;transport;ion transport;metabolism			-0.725992	0.553551	-0.375425	0.153673	0.17918	0.384555	0.305137			-0.396961			-0.176856		0.326505	-0.446531
AAEL001114	amino acid transporter	TRP				GO:0005215,GO:0005623,GO:0006810	ENSANGP00000020152 [Anopheles gambiae str. PEST]	Sodium:dicarboxylate symporter;Blood group Rhesus C/E and D polypeptide;Amino acid transporter, transmembrane;Amino acid/polyamine transporter II	transporter activity;cell;transport			0.637706	1.02571	0.611132	1.11894	1.16644	0.812446	0.596106	1.07949	1.26296	1.6021	0.464761	0.565312	1.15476	0.418507		1.30275
AAEL001115	conserved hypothetical protein	TRP				GO:0005515,GO:0008270	ENSANGP00000029265 [Anopheles gambiae str. PEST]	H+-transporting two-sector ATPase, alpha/beta subunit, central region;Zinc finger, RING-type	protein binding;zinc ion binding
AAEL001116	hypothetical protein	D					PREDICTED: similar to Homeobox protein Nkx-2.5 (Homeobox protein NK-2 homolog E) (Cardiac-specific homeobox) (Homeobox protein CSX) [Strongylocentrotus purpuratus]
AAEL001117	conserved hypothetical protein	U
AAEL001118	conserved hypothetical protein	U					ENSANGP00000019056 [Anopheles gambiae str. PEST]
AAEL001119	DNA-binding protein Ewg, putative	RTT				GO:0003677,GO:0005634,GO:0007275,GO:0009653,GO:0016740,GO:0030528	ENSANGP00000003035 [Anopheles gambiae str. PEST]		DNA binding;nucleus;development;morphogenesis;transferase activity;transcription regulator activity
AAEL001120	conserved hypothetical protein	D					ENSANGP00000028341 [Anopheles gambiae str. PEST]	Protein kinase C, phorbol ester/diacylglycerol binding
AAEL001121	n-acetylgalactosaminyltransferase	M				GO:0005794,GO:0005975,GO:0006412,GO:0006464,GO:0009058,GO:0016740	ENSANGP00000029676 [Anopheles gambiae str. PEST]	Ribosome-binding factor A;Glycosyl transferase, family 2;Ricin B lectin	Golgi apparatus;carbohydrate metabolism;protein biosynthesis;protein modification;biosynthesis;transferase activity
AAEL001122	n-acetylgalactosaminyltransferase	M				GO:0005794,GO:0005975,GO:0006412,GO:0006464,GO:0009058,GO:0016740	PREDICTED: similar to ENSANGP00000029676 [Apis mellifera]	Glycosyl transferase, family 2;Ricin B lectin	Golgi apparatus;carbohydrate metabolism;protein biosynthesis;protein modification;biosynthesis;transferase activity				0.371116	-0.660983	0.113341		-0.455384	-0.611644	-0.28891
AAEL001123	conserved hypothetical protein	TRP				GO:0005216,GO:0005623,GO:0006811,GO:0007582	ENSANGP00000009093 [Anopheles gambiae str. PEST]	Ankyrin;Ion transport;Cation (not K+) channel, TM region	ion channel activity;cell;ion transport;physiological process
AAEL001124	conserved hypothetical protein	D				GO:0005554	ENSANGP00000027065 [Anopheles gambiae str. PEST]		molecular function unknown
AAEL001125	p15-2b protein, putative	D					ENSANGP00000011961 [Anopheles gambiae str. PEST]	Nuclear transport factor 2
AAEL001126	rest corepressor (corest) protein	D				GO:0003677,GO:0005634,GO:0006350,GO:0030528,GO:0050789	ENSANGP00000022129 [Anopheles gambiae str. PEST]	ELM2;Myb, DNA-binding	DNA binding			0.187233	0.500025	-0.00195481	0.426199	0.561936	0.681978	-0.0259587	-0.149684	-0.608067		-0.493438	-0.187233	-0.322593	-0.380054		-0.0750552
AAEL001127	defective proboscis extension response, putative	I					ENSANGP00000021931 [Anopheles gambiae str. PEST]	Immunoglobulin V-set;Immunoglobulin;Immunoglobulin-like				-0.201091	-0.336981	-0.378741	-0.207706	-0.395324	-0.335622	-0.217267	-0.553501	-0.147434	-0.11597	-0.217071	0.00853477	0.0209931	0.561963	-0.634447	-0.652371
AAEL001128	AMP dependent coa ligase	M				GO:0003824,GO:0006629,GO:0009058,GO:0016740	ENSANGP00000021357 [Anopheles gambiae str. PEST]	AMP-dependent synthetase and ligase	catalytic activity;lipid metabolism;biosynthesis;transferase activity											-0.1398		0.187245	-0.0808126			0.0671091
AAEL001129	conserved hypothetical protein	D				GO:0005941,GO:0006464,GO:0030234,GO:0050789	ENSANGP00000021997 [Anopheles gambiae str. PEST]		unlocalized protein complex;protein modification;enzyme regulator activity;regulation of biological process			-0.365313	0.229548	-0.0524605	-0.0253002	-0.390518		-0.328748	-0.326103	-0.132416	0.172502	-0.178838		-0.302141	-0.198065	-0.0918054	-0.623913
AAEL001130	alpha-amylase	DIG				GO:0005509,GO:0005975,GO:0016787	ENSANGP00000016525 [Anopheles gambiae str. PEST]	Glycoside hydrolase family 13;Alpha amylase, catalytic region;Alpha amylase, C-terminal all-beta	calcium ion binding;carbohydrate metabolism;hydrolase activity
AAEL001131	splicing factor, putative	RTT				GO:0003676	ENSANGP00000016629 [Anopheles gambiae str. PEST]	RNA-binding region RNP-1 (RNA recognition motif)	nucleic acid binding											0.986536	-0.113765	-0.220787		0.182393	0.260039	-0.1445	-0.166409
AAEL001132	conserved hypothetical protein	U					ENSANGP00000022521 [Anopheles gambiae str. PEST]						-0.435842	-0.674415	-0.433133	-0.317544		-0.359559	-0.391659	0.181085	-0.260751	-0.365814	-0.393251	-0.332923	-0.279547	-0.14082	-0.402682
AAEL001133	conserved hypothetical protein	D					ENSANGP00000016614 [Anopheles gambiae str. PEST]	Synembryn
AAEL001134	methylmalonate-semialdehyde dehydrogenase	D				GO:0003824,GO:0005739,GO:0006139,GO:0006519,GO:0009056	ENSANGP00000022164 [Anopheles gambiae str. PEST]	Aldehyde dehydrogenase	catalytic activity;mitochondrion;nucleobase\, nucleoside\, nucleotide and nucleic acid metabolism;amino acid and derivative metabolism;catabolism			0.310061	0.37441	-0.19469	0.399362	0.203717	0.247778	0.302927	-0.426075	0.698459	0.381329	0.0653911	-0.0255987		0.184412	0.311749	0.259617
AAEL001135	hypothetical protein	U
AAEL001136	hypothetical protein	RTT					ribosome-associated GTPase [Flavobacteriales bacterium HTCC2170]
AAEL001137	hypothetical protein	U					ENSANGP00000025946 [Anopheles gambiae str. PEST]
AAEL001138	hypothetical protein	D				GO:0003676,GO:0005634,GO:0008270	PREDICTED: similar to cDNA sequence BC043301 [Strongylocentrotus purpuratus]		nucleic acid binding;nucleus;zinc ion binding			0.26412	-0.432748	-0.221846		-0.415121	-0.22863		-0.546117				-0.26412	-0.153891			-0.317899
AAEL001139	br serine/threonine-protein kinase	D				GO:0000166,GO:0004672,GO:0004871,GO:0006464,GO:0007165	ENSANGP00000009090 [Anopheles gambiae str. PEST]	Protein kinase;Serine/threonine protein kinase, active site;Tyrosine protein kinase	nucleotide binding;protein kinase activity;signal transducer activity;protein modification;signal transduction
AAEL001140	MutS protein, putative	D				GO:0003684,GO:0005524,GO:0006259,GO:0006298	ENSANGP00000016548 [Anopheles gambiae str. PEST]	MutS III;DNA mismatch repair protein MutS, C-terminal	;ATP binding;DNA metabolism;mismatch repair
AAEL001141	transcriptional regulator ATRX (X-linked helicase II)	RTT				GO:0000166,GO:0003676,GO:0003677,GO:0003824,GO:0005634,GO:0006259,GO:0006350,GO:0006950,GO:0009719,GO:0030528,GO:0050789	ENSANGP00000021890 [Anopheles gambiae str. PEST]	SNF2lated;Helicase, C-terminal	nucleotide binding;nucleic acid binding;DNA binding;catalytic activity;nucleus;DNA metabolism;transcription;response to stress;response to endogenous stimulus;transcription regulator activity;regulation of biological process			0.430845	0.166107	0.311183	0.516	0.590849	0.389927	0.11631	0.10389	0.316679	0.118269	0.569327	-0.430845	0.481797	0.262249	0.345517	0.664255
AAEL001142	rab gdp/gtp exchange factor	D				GO:0005515,GO:0006810,GO:0007165		SH2 motif;Vacuolar sorting protein 9;RA	protein binding;transport;signal transduction											-0.287451	0.70828	-0.227584		0.236625	0.493618	0.35033	-0.400875
AAEL001143	conserved hypothetical protein	U					ENSANGP00000015636 [Anopheles gambiae str. PEST]																	-0.302322
AAEL001144	conserved hypothetical protein	PROT					ENSANGP00000021942 [Anopheles gambiae str. PEST]	Peptidase M14, carboxypeptidase A						-0.49283	-0.229757	-0.312637	-0.0877269	-0.209943	-0.197282	0.189216					0.374674		-0.16835
AAEL001145	dual specificity protein phosphatase 7, putative	D				GO:0004721,GO:0005737,GO:0005975,GO:0006091,GO:0006464,GO:0007165,GO:0009056,GO:0016787,GO:0030234	ENSANGP00000016464 [Anopheles gambiae str. PEST]	MAP kinase phosphatase;Dual specificity protein phosphatase;Tyrosine specific protein phosphatase and dual specificity protein phosphatase	phosphoprotein phosphatase activity;cytoplasm;carbohydrate metabolism;generation of precursor metabolites and energy;protein modification;signal transduction;catabolism;hydrolase activity;enzyme regulator activity
AAEL001146	n-acetylgalactosaminyltransferase	M				GO:0005794,GO:0005975,GO:0006412,GO:0006464,GO:0009058,GO:0016740	ENSANGP00000029676 [Anopheles gambiae str. PEST]	Glycosyl transferase, family 2;Ricin B lectin	Golgi apparatus;carbohydrate metabolism;protein biosynthesis;protein modification;biosynthesis;transferase activity			0.0855658	-0.569009	-0.451018	-0.90725	-0.554443	-0.446425	-0.452525	0.197426				-0.0855658
AAEL001147	nucleic acid binding, zinc ion binding	RTT					ENSANGP00000016491 [Anopheles gambiae str. PEST]								-0.298384						-0.173401	0.166083			-0.227797		-0.252159
AAEL001148	homeobox protein	RTT				GO:0003677,GO:0003700,GO:0005634,GO:0006350,GO:0007582,GO:0050789	CG32532-PA [Drosophila melanogaster]	Homeobox	DNA binding;transcription factor activity;nucleus;transcription;physiological process;regulation of biological process
AAEL001149	conserved hypothetical protein	D				GO:0005515	ENSANGP00000016663 [Anopheles gambiae str. PEST]	Orn/DAP/Arg decarboxylase 2;BTB/POZ;BTB	protein binding
AAEL001150	conserved hypothetical protein	D					ENSANGP00000016464 [Anopheles gambiae str. PEST]	MAP kinase phosphatase;Rhodanese-like
AAEL001151	n-acetylgalactosaminyltransferase	M				GO:0005794,GO:0005975,GO:0006412,GO:0006464,GO:0009058,GO:0016740	ENSANGP00000029676 [Anopheles gambiae str. PEST]	Glycosyl transferase, family 2;Ricin B lectin	Golgi apparatus;carbohydrate metabolism;protein biosynthesis;protein modification;biosynthesis;transferase activity			0.6493	0.595832	0.430732		0.834968	0.80401		0.328386
AAEL001152	beta-1,3-galactosyltransferase-6	D				GO:0005623,GO:0005975,GO:0006412,GO:0006464,GO:0009058,GO:0016740,GO:0019538	ENSANGP00000016733 [Anopheles gambiae str. PEST]	Glycosyl transferase, family 31	cell;carbohydrate metabolism;protein biosynthesis;protein modification;biosynthesis;transferase activity;protein metabolism
AAEL001153	conserved hypothetical protein	D				GO:0005549,GO:0006810	ENSANGP00000026538 [Anopheles gambiae str. PEST]	Pheromone/general odorant binding protein, PBP/GOBP	odorant binding;transport
AAEL001154	conserved hypothetical protein	D					ENSANGP00000015697 [Anopheles gambiae str. PEST]	Zinc finger, C2H2-type;Antifreeze protein, type I;Ubiquitin-associated;UBX
AAEL001155	hypothetical protein	D				GO:0003676	ENSANGP00000016717 [Anopheles gambiae str. PEST]		nucleic acid binding										-0.152166	-0.330833	-0.367472	-0.651485	-0.464538	-0.586594	-0.523204	-0.230645	-0.570797
AAEL001156	conserved hypothetical protein	U					ENSANGP00000019601 [Anopheles gambiae str. PEST]	Protein of unknown function UPF0193				0.0673188	-0.413706	-0.224384		-0.302208	-0.312053	-0.307329	-0.381774			0.199889	-0.0673188				-0.128866
AAEL001157	light protein	D					ENSANGP00000016789 [Anopheles gambiae str. PEST]	Zinc finger, RING-type;7-Fold repeat in clathrin and VPS proteins
AAEL001158	fructose-1,6-bisphosphatase	TRP				GO:0005975,GO:0016787			carbohydrate metabolism				0.0533635		-0.175209			-0.635389	0.61842		-0.0976508	0.148031	-0.228681	0.0509831		0.0804129	0.295006
AAEL001159	ribonuclease t2	RTT				GO:0003676,GO:0003723,GO:0004518,GO:0006139,GO:0009056	ENSANGP00000015692 [Anopheles gambiae str. PEST]	Ribonuclease T2	nucleic acid binding;RNA binding;nuclease activity;nucleobase\, nucleoside\, nucleotide and nucleic acid metabolism;catabolism			-0.159355	0.149752	-0.150214	0.142048					-0.513201			0.159355			-0.235281	-0.257369
AAEL001160	zinc finger protein	D				GO:0003676,GO:0005634,GO:0008270		Zinc finger, C2H2-type;Peptidase M, neutral zinc metallopeptidases, zinc-binding site;Zinc finger, C2H2-subtype	nucleic acid binding;nucleus;zinc ion binding												0.200684					-0.199606	-0.113485
AAEL001161	hypothetical protein	U					unknown [Schistosoma japonicum]
AAEL001162	conserved hypothetical protein	U					ENSANGP00000021101 [Anopheles gambiae str. PEST]						0.337857						-0.357294		0.312921	-0.622426		-0.89703	-0.397581	-0.468743	-0.541489
AAEL001163	macroglobulin/complement	I	TEP24	TEP	TEP	GO:0006950,GO:0007582,GO:0009607,GO:0030234	ENSANGP00000019522 [Anopheles gambiae str. PEST]	Alpha-2-macroglobulin;Alpha-2-macroglobulin, N-terminal;Alpha-2-macroglobulin, N-terminal 2;A-macroglobulin complement component;A-macroglobulin receptor	response to stress;physiological process;response to biotic stimulus;enzyme regulator activity	Aaeg:N19305
AAEL001164	NADH:ubiquinone dehydrogenase, putative	REDOX/STRESS/MIT				GO:0003824,GO:0005489,GO:0005739,GO:0006118,GO:0043234	ENSANGP00000013247 [Anopheles gambiae str. PEST]	NADH:ubiquinone oxidoreductase 17.2 kD subunit	catalytic activity;electron transporter activity;mitochondrion;electron transport;protein complex			-0.247936		0.177287		-0.194248		-1.19831	-0.307863		-0.107917		0.291452	-0.409719	-0.194236	-0.657352	-0.450686
AAEL001165	ras GTP exchange factor, son of sevenless	D				GO:0003677,GO:0005515,GO:0005634,GO:0005694,GO:0006259,GO:0006996,GO:0007010,GO:0007165,GO:0007275,GO:0009653,GO:0009790,GO:0016043,GO:0019538,GO:0030154,GO:0030234,GO:0043234	ENSANGP00000016641 [Anopheles gambiae str. PEST]	Guanine-nucleotide dissociation stimulator CDC25;Histone H2A;Histone core;DH;Pleckstrin-like;Guanine nucleotide exchange factor for Ras-like GTPases, N-terminal;Histone-fold/TFIID-TAF/NF-Y;Prolinech region	DNA binding;protein binding;nucleus;chromosome;DNA metabolism;organelle organization and biogenesis;cytoskeleton organization and biogenesis;signal transduction;development;morphogenesis;embryonic development;cell organization and biogenesis;protein metab			0.241658	0.747041	0.218113	-0.366883	0.722421	0.751312		-0.546165	0.366856	0.120136	0.170534	-0.241658	0.272375	0.254	0.27972
AAEL001166	protein phosphatases pp1 regulatory subunit	D				GO:0005576,GO:0006810,GO:0006950,GO:0007049,GO:0007582,GO:0009607,GO:0015031,GO:0016043,GO:0030234,GO:0050789	ENSANGP00000015763 [Anopheles gambiae str. PEST]	Cecropin;Leucinech repeat;Leucinech repeat, SDS22	extracellular region;transport;response to stress;cell cycle;physiological process;response to biotic stimulus;protein transport;cell organization and biogenesis;enzyme regulator activity;regulation of biological process			-0.287378	0.153199	-0.241107	0.422114	-0.370441			-0.34113	-0.657159	0.143719	-1.33159	0.124902	-0.615323	-0.169698	-0.486116	-0.657041
AAEL001167	synaptotagmin	D				GO:0006810,GO:0007267,GO:0008289,GO:0015031,GO:0016043	ENSANGP00000005071 [Anopheles gambiae str. PEST]	C2;Synaptotagmin	transport;cell-cell signaling;lipid binding;protein transport;cell organization and biogenesis
AAEL001168	hypothetical protein	U					ENSANGP00000025993 [Anopheles gambiae str. PEST]
AAEL001169	ribosome biogenesis protein bop1 (block of proliferation 1 protein)	RTT				GO:0005488,GO:0005730,GO:0006996,GO:0007028	ENSANGP00000007563 [Anopheles gambiae str. PEST]	WD-40 repeat;BOP1, N-terminal	binding;nucleolus;organelle organization and biogenesis;cytoplasm organization and biogenesis
AAEL001170	conserved hypothetical protein	M				GO:0006464,GO:0016787,GO:0019538	ENSANGP00000019613 [Anopheles gambiae str. PEST]	Lipase, active site;Epoxide hydrolase;Alpha/beta hydrolase;Transcription factor TFIIB related;Antifreeze protein, type I;Alpha/beta hydrolase fold-1;Esterase/lipase/thioesterase	protein modification;hydrolase activity;protein metabolism
AAEL001171	tRNA-dihydrouridine synthase	RTT				GO:0003676,GO:0008033,GO:0008270,GO:0016491,GO:0050660	ENSANGP00000016833 [Anopheles gambiae str. PEST]	Dihydrouridine synthase, DuS	nucleic acid binding;tRNA processing;zinc ion binding;oxidoreductase activity;			-0.356159	-0.264019	-0.618297	-0.37646	-0.713226	-0.622219	-0.711096	-0.455047	-0.321208		-0.414568	0.356159	-0.288994	-0.45503	-0.621429	-0.522717
AAEL001172	conserved hypothetical protein	U					ENSANGP00000025700 [Anopheles gambiae str. PEST]					0.0416246	-0.139145	-0.411073	-0.206424	-0.228115	-0.254199	-0.362364	-0.418341	-0.502648	0.284107	-0.279674	-0.0416246	-0.318005	-0.16307	-0.387092	-0.451975
AAEL001173	amidase	DIG				GO:0006139,GO:0006412,GO:0006519,GO:0008152,GO:0016787	ENSANGP00000020940 [Anopheles gambiae str. PEST]	Amidase	nucleobase\, nucleoside\, nucleotide and nucleic acid metabolism;protein biosynthesis;amino acid and derivative metabolism;metabolism;hydrolase activity
AAEL001174	hypothetical protein	CSR					odorant-binding protein AgamOBP45 [Anopheles gambiae]	Pheromone/general odorant binding protein, PBP/GOBP
AAEL001175	DNA photolyase	REDOX/STRESS/MIT				GO:0003676,GO:0003824,GO:0006259,GO:0006950,GO:0009719	ENSANGP00000013343 [Anopheles gambiae str. PEST]	Major intrinsic protein;Deoxyribodipyrimidine photolyase, class 1;DNA photolyase, N-terminal;DNA photolyase, FAD-binding	nucleic acid binding;catalytic activity;DNA metabolism;response to stress;response to endogenous stimulus											-0.368141	-0.13708	-0.584368	-0.339566	-0.318459	-0.200725	-0.273421	-0.608653
AAEL001176	s-adenosylmethionine decarboxylase	D				GO:0003824,GO:0006519,GO:0009058	ENSANGP00000020888 [Anopheles gambiae str. PEST]	S-adenosylmethionine decarboxylase	catalytic activity;amino acid and derivative metabolism;biosynthesis														0.107931		-0.327324		-0.115513
AAEL001177	signal recognition particle, 14kD, putative	RTT				GO:0003723,GO:0005786,GO:0006605	CG5417-PA [Drosophila melanogaster]	Signal recognition particle, 14 kDa protein	RNA binding;signal recognition particle (sensu Eukaryota);protein targeting			-0.557688	-0.198651	-0.0142897	-0.288423		-0.333828	-0.291555	0.734417	-0.0967152			-0.232485	-0.132262	-0.120862	-0.258745	-0.284308
AAEL001178	serine protease	I				GO:0008233,GO:0009607,GO:0019538	ENSANGP00000013290 [Anopheles gambiae str. PEST]	Peptidase S1 and S6, chymotrypsin/Hap;Peptidase S1A, chymotrypsin	peptidase activity;response to biotic stimulus;protein metabolism
AAEL001179	conserved hypothetical protein	CSR				GO:0005549,GO:0006810	odorant-binding protein AgamOBP45 [Anopheles gambiae]	Pheromone/general odorant binding protein, PBP/GOBP	odorant binding;transport
AAEL001180	hypothetical protein	U					hypothetical protein [Oryza sativa (japonica cultivar-group)]
AAEL001181	hypothetical protein	U
AAEL001182	phosphotyrosyl phosphatase activator	D				GO:0030234	ENSANGP00000013063 [Anopheles gambiae str. PEST]	Phosphotyrosyl phosphatase activator, PTPA	enzyme regulator activity			0.110563	0.287322	-0.131479		-0.165044	0.133109		0.140637	-0.341018	-0.118511	-0.393491	-0.110563	-0.30378	-0.318633	-0.186764	-0.414762
AAEL001183	zinc binding dehydrogenase	M				GO:0003824,GO:0005488	ENSANGP00000016691 [Anopheles gambiae str. PEST]	Glucose/ribitol dehydrogenase;Alcohol dehydrogenase GroES-like;Alcohol dehydrogenase, zinc-binding	catalytic activity;binding
AAEL001184	conserved hypothetical protein	U					ENSANGP00000013108 [Anopheles gambiae str. PEST]														0.519409	0.866694		0.723463	0.253561		0.753291
AAEL001185	conserved hypothetical protein	U					PREDICTED: hypothetical protein XP_395733 [Apis mellifera]						-0.325912	-0.232845	0.502977	-0.194906	-0.140319	0.213351	0.414963	-0.0363171		-0.322146					-0.222706
AAEL001186	hypothetical protein	U					unnamed protein product [Aspergillus oryzae]									-1.2883			-0.709204					-0.974287			-0.731818
AAEL001187	conserved hypothetical protein	D				GO:0000166,GO:0003824,GO:0005515,GO:0006139,GO:0006350,GO:0006412,GO:0006519,GO:0007165,GO:0030528,GO:0050789	GA10823-PA [Drosophila pseudoobscura]	Dcp1-like decapping	nucleotide binding;catalytic activity;protein binding;nucleobase\, nucleoside\, nucleotide and nucleic acid metabolism;transcription;protein biosynthesis;amino acid and derivative metabolism;signal transduction;transcription regulator activity;regulation			0.126363		0.220158	0.0817792	0.166571	0.25277	0.119133	0.0832834	0.262755	0.0912783		-0.126363	0.110789	0.182664	0.218117	-0.405505
AAEL001188	conserved hypothetical protein	D				GO:0005634,GO:0005737,GO:0007165,GO:0007582,GO:0016787	ENSANGP00000018255 [Anopheles gambiae str. PEST]	Ras GTPase;Gtr1/RagA G protein	nucleus;cytoplasm;signal transduction;physiological process;hydrolase activity				0.248945	0.0788378	0.540515	0.31014	0.704053	0.327154	0.345263	-0.219985	0.0208009	-0.0336565	0.460148	0.194127	0.0309846	-0.0810591	-0.0672956
AAEL001189	conserved hypothetical protein	CSR					odorant-binding protein AgamOBP45 [Anopheles gambiae]	Pheromone/general odorant binding protein, PBP/GOBP
AAEL001190	conserved hypothetical protein	U					ENSANGP00000015795 [Anopheles gambiae str. PEST]	Protein of unknown function DUF803				-0.924762	-0.783799	-0.629127	-0.700309	-0.634487	-0.545243	-0.670335	-0.205901	-0.480466	-0.103565	-0.288429		-0.423127	-0.329346	-0.376094	-0.164187
AAEL001191	conserved hypothetical protein	D				GO:0016787	ENSANGP00000012214 [Anopheles gambiae str. PEST]		hydrolase activity					-0.4065			-0.27674
AAEL001192	hypothetical protein	U					ENSANGP00000025637 [Anopheles gambiae str. PEST]														-0.235744
AAEL001193	regulator of g protein signaling	D				GO:0004871,GO:0007165,GO:0030234,GO:0050789	ENSANGP00000011139 [Anopheles gambiae str. PEST]	Regulator of G protein signalling	signal transducer activity;signal transduction;enzyme regulator activity;regulation of biological process
AAEL001194	fatty acid synthase	M				GO:0003824,GO:0005488,GO:0006629,GO:0009058,GO:0016740,GO:0016787	ENSANGP00000016695 [Anopheles gambiae str. PEST]	Beta-ketoacyl synthase;Acyl transferase region;Alcohol dehydrogenase, zinc-binding;Short-chain dehydrogenase/reductase SDR;Thioesterase;Phosphopantetheine-binding	catalytic activity;binding;lipid metabolism;biosynthesis;transferase activity;hydrolase activity			-0.644537	0.510003	0.230906	0.212646		0.106955	-0.376436	-0.311081	-0.659448	-0.679987	0.41408	0.30951		-0.204346	-0.454318	-1.19261
AAEL001195	Juvenile hormone-inducible protein, putative	D				GO:0005554	ENSANGP00000011548 [Anopheles gambiae str. PEST]	Aminoglycoside phosphotransferase;Protein of unknown function DUF227	molecular function unknown			0.110056	-0.166468				-0.546752						-0.110056
AAEL001196	cadherin	CS				GO:0004872,GO:0005198,GO:0005509,GO:0005515,GO:0005623,GO:0005886,GO:0007165,GO:0009653,GO:0016043,GO:0030154,GO:0050789	ENSANGP00000010153 [Anopheles gambiae str. PEST]	Aspartic acid and asparagine hydroxylation site;EGF-like region;Cadherin;EGF-like, type 2;EGF-like;Laminin G, subdomain 1;Laminin G, subdomain 2;EGF, extracellular;Cadherin cytoplasmic region;Laminin G;EGF-like, type 3	receptor activity;structural molecule activity;calcium ion binding;protein binding;cell;plasma membrane;signal transduction;morphogenesis;cell organization and biogenesis;cell differentiation;regulation of biological process
AAEL001197	hypothetical protein	U					CG33143-PC, isoform C [Drosophila melanogaster]
AAEL001198	sodium/solute symporter	TRP				GO:0005215,GO:0005623,GO:0006810,GO:0006811,GO:0008152,GO:0019538	ENSANGP00000023805 [Anopheles gambiae str. PEST]	Na+/solute symporter	transporter activity;cell;transport;ion transport;metabolism;protein metabolism			0.17036		0.501429	0.878506	0.607556	0.636284		0.168785	-0.117254	0.179962	0.0742111	-0.17036	0.325318	0.102962
AAEL001199	Putative GTP-binding protein 5	D				GO:0000166,GO:0016787	RE71283p [Drosophila melanogaster]	GTP1/OBG;GTP1/OBG subdomain;GTP-binding protein, HSR1lated	nucleotide binding;hydrolase activity				-0.722126	0.247747	0.133676	-0.254982			0.267144	-0.00378165	-0.125447	0.197149	0.380201	0.0691042	0.253458	0.351844
AAEL001200	aspartyl-tRNA synthetase	D				GO:0000166,GO:0003723,GO:0003824,GO:0005737,GO:0006139,GO:0006412,GO:0006519	ENSANGP00000018448 [Anopheles gambiae str. PEST]	Aspartyl-tRNA synthetase, class IIb;Lysyl-tRNA synthetase, class-2;nucleic acid binding, OB-fold, tRNA/helicase-type;tRNA synthetase, class II (D, K and N);Aminoacyl-transfer RNA synthetase, class II	nucleotide binding;RNA binding;catalytic activity;cytoplasm;nucleobase\, nucleoside\, nucleotide and nucleic acid metabolism;protein biosynthesis;amino acid and derivative metabolism			0.41718	0.386457	0.639606		0.063136				0.397931	0.549641	-0.0736828	-0.513028	0.277372	0.259856	0.12391
AAEL001201	hypothetical protein	U					ENSANGP00000016633 [Anopheles gambiae str. PEST]					-0.142206	-0.346907	0.161366	-0.0941741					-0.472588	-0.755235	-0.230152	0.142206		-0.04859	-0.196405
AAEL001202	conserved hypothetical protein	D					ENSANGP00000021974 [Anopheles gambiae str. PEST]	PIG-X/PBN1					-0.115774	0.189059		-0.014315	-0.130164		0.0618334	-0.0654925	-0.00817674	-0.00672445		0.257918	0.198531	-0.199147	-0.189287
AAEL001203	conserved hypothetical protein	D				GO:0005488,GO:0007582,GO:0008283,GO:0016787	ENSANGP00000021360 [Anopheles gambiae str. PEST]	Ankyrin;Zinc finger, DHHC-type	binding;physiological process;cell proliferation;hydrolase activity
AAEL001204	sterol o-acyltransferase	M				GO:0000003,GO:0000166,GO:0003676,GO:0003824,GO:0005737,GO:0006139,GO:0006412,GO:0006519,GO:0006629,GO:0008219,GO:0009058,GO:0016740,GO:0050789	ENSANGP00000002281 [Anopheles gambiae str. PEST]	Membrane bound O-acyl transferase, MBOAT	reproduction;nucleotide binding;nucleic acid binding;catalytic activity;cytoplasm;nucleobase\, nucleoside\, nucleotide and nucleic acid metabolism;protein biosynthesis;amino acid and derivative metabolism;lipid metabolism;cell death;biosynthesis;transfera			0.396545	-0.86664		0.57613	-0.307512	0.247713	0.198178	-0.739454	0.228203		-0.623245	0.621478	-0.676821	-0.17928	-0.192591	-0.280839
AAEL001205	ubiquitin protein ligase	D				GO:0003824,GO:0005622,GO:0006464,GO:0007165,GO:0009653,GO:0019538	ENSANGP00000016497 [Anopheles gambiae str. PEST]	WW/Rsp5/WWP;WW;C2;HECT	catalytic activity;intracellular;protein modification;signal transduction;morphogenesis;protein metabolism			0.137002			0.177911		0.279014		-0.179124	-0.1299	-0.278385	-0.24155				-0.0700044	-0.455167
AAEL001206	threonyl-tRNA synthetase	D				GO:0000166,GO:0003723,GO:0003824,GO:0006139,GO:0006412,GO:0006519	ENSANGP00000021424 [Anopheles gambiae str. PEST]	Threonyl-tRNA synthetase, class IIa;TGS;Threonyl/alanyl tRNA synthetase, SAD;tRNA synthetase, class II (G, H, P and S);Anticodon-binding;Aminoacyl-transfer RNA synthetase, class II	nucleotide binding;RNA binding;catalytic activity;nucleobase\, nucleoside\, nucleotide and nucleic acid metabolism;protein biosynthesis;amino acid and derivative metabolism			-0.150832	-0.0781012	-0.075945	-0.0813233	-0.193635	-0.212805	-0.425196	-0.194803	-0.160027	0.113663	-0.340101	0.150832		-0.25609	-0.235437	-0.384169
AAEL001207	hypothetical protein	D				GO:0008270	ENSANGP00000002283 [Anopheles gambiae str. PEST]	LIM, zinc-binding	zinc ion binding												0.585159
AAEL001208	ubiquitin-conjugating enzyme variant	D					ENSANGP00000013131 [Anopheles gambiae str. PEST]
AAEL001209	sodium-dependent phosphate transporter	TRP				GO:0005215,GO:0005623,GO:0005975,GO:0006810,GO:0006811,GO:0008152	ENSANGP00000021422 [Anopheles gambiae str. PEST]	Major facilitator superfamily MFS_1;Major facilitator superfamily	transporter activity;cell;carbohydrate metabolism;transport;ion transport;metabolism			-0.356303	0.0528868	0.18388	0.141557	-0.103458	-0.0192551	0.332031	-0.322993	-0.779625	-0.555398	-0.672328	-0.45414	-0.573944	-0.593881	-0.637652	-0.769758
AAEL001210	NADH ubiquinone oxidoreductase subunit, putative	REDOX/STRESS/MIT					ENSANGP00000016606 [Anopheles gambiae str. PEST]					-0.386834	-0.0560433	0.930559	0.394971	0.872191	0.519985		-0.0480088	0.715935	-0.181467	1.34122	0.881578	0.731872	0.896309	-0.12847	-0.222773
AAEL001211	COMPASS component SWD2, putative	CS				GO:0005815,GO:0005856,GO:0007010,GO:0043234	ENSANGP00000013183 [Anopheles gambiae str. PEST]	WD-40 repeat	microtubule organizing center;cytoskeleton;cytoskeleton organization and biogenesis;protein complex			-0.225013	-0.758561	-0.0953896	-0.0180952	-0.327176	-0.283371	-0.241506	-0.382498	0.0938794	-0.380352	-0.213767	0.225013		-0.369409	-0.194532	-0.621094
AAEL001212	phosphoinositide-binding protein, putative	D				GO:0005488	ENSANGP00000021406 [Anopheles gambiae str. PEST]	WD-40 repeat;G-protein, beta subunit;Zinc finger, FYVE-type	binding											0.135046	0.246043				0.124811	0.183219	-0.0995969
AAEL001213	conserved hypothetical protein	U					unnamed protein product [Photorhabdus luminescens subsp. laumondii TTO1]
AAEL001215	conserved hypothetical protein	U					ENSANGP00000015953 [Anopheles gambiae str. PEST]
AAEL001216	DEAD box ATP-dependent RNA helicase	RTT				GO:0000166,GO:0003723,GO:0003824,GO:0005634,GO:0006139,GO:0006810,GO:0016043,GO:0016787,GO:0043234,GO:0050789	ENSANGP00000023803 [Anopheles gambiae str. PEST]	DEAD/DEAH box helicase, N-terminal;Helicase, C-terminal;DEAD/DEAH box helicase	nucleotide binding;RNA binding;catalytic activity;nucleus;nucleobase\, nucleoside\, nucleotide and nucleic acid metabolism;transport;cell organization and biogenesis;hydrolase activity;protein complex;regulation of biological process			-0.16899	0.15169	-0.530175	-0.318409		0.313638	0.333844	-0.235286	-0.421987	0.445478	-0.919061	-0.327077	-0.149107	-0.215579		-1.18587
AAEL001217	tripartite motif protein 45	D				GO:0000166,GO:0003824,GO:0005215,GO:0005488,GO:0005622,GO:0005623,GO:0006091,GO:0006139,GO:0006464,GO:0006811,GO:0009058,GO:0016787,GO:0043234	ENSANGP00000013208 [Anopheles gambiae str. PEST]	Zinc finger, RING-type;Zinc finger, B-box;Filamin/ABP280 repeat	nucleotide binding;catalytic activity;transporter activity;binding;intracellular;cell;generation of precursor metabolites and energy;nucleobase\, nucleoside\, nucleotide and nucleic acid metabolism;protein modification;ion transport;biosynthesis;hydrolase
AAEL001218	alanyl-tRNA synthetase	RTT				GO:0000166,GO:0003723,GO:0003824,GO:0006139,GO:0006412,GO:0006519	ENSANGP00000013174 [Anopheles gambiae str. PEST]	Alanyl-tRNA synthetase, class IIc;Threonyl/alanyl tRNA synthetase, SAD	nucleotide binding;RNA binding;catalytic activity;nucleobase\, nucleoside\, nucleotide and nucleic acid metabolism;protein biosynthesis;amino acid and derivative metabolism			0.562247	0.449075	0.278918	0.189123	0.156251	0.220203	0.298029	0.626749	0.536813	0.415415	-0.187323		-0.0964113	0.0778486	0.383248	0.26464
AAEL001219	hypothetical protein	D				GO:0005576,GO:0006030,GO:0008061	ENSANGP00000029343 [Anopheles gambiae str. PEST]	Aldehyde dehydrogenase;Chitin binding Peritrophin-A	extracellular region;chitin metabolism;chitin binding
AAEL001220	myosin vii	CS				GO:0000166,GO:0003774,GO:0003779,GO:0005198,GO:0005856,GO:0006810,GO:0007582,GO:0008092,GO:0015031,GO:0016043,GO:0016787,GO:0043234	ENSANGP00000021394 [Anopheles gambiae str. PEST]	Tyrosine protein kinase, active site;Myosin head, motor region;Tyrosine protein kinase;Protein kinase;IQ calmodulin-binding region	nucleotide binding;motor activity;actin binding;structural molecule activity;cytoskeleton;transport;physiological process;cytoskeletal protein binding;protein transport;cell organization and biogenesis;hydrolase activity;protein complex
AAEL001221	Odorant receptor 83c, putative	CSR				GO:0004984,GO:0005549,GO:0007608,GO:0016020	ENSANGP00000022907 [Anopheles gambiae str. PEST]	Olfactory receptor, Drosophila	olfactory receptor activity;odorant binding;sensory perception of smell;membrane
AAEL001222	hypothetical protein	U					ENSANGP00000029706 [Anopheles gambiae str. PEST]
AAEL001223	engulfment and cell motility protein	CS				GO:0005856,GO:0006810,GO:0006909,GO:0006915,GO:0007010,GO:0007582,GO:0008219	ENSANGP00000010572 [Anopheles gambiae str. PEST]	Engulfment and cell motility, ELM	cytoskeleton;transport;phagocytosis;apoptosis;cytoskeleton organization and biogenesis;physiological process;cell death
AAEL001224	conserved hypothetical protein	CSR					ENSANGP00000022502 [Anopheles gambiae str. PEST]	Olfactory receptor, Drosophila
AAEL001225	glycoside hydrolases	M				GO:0005975,GO:0016787	ENSANGP00000019399 [Anopheles gambiae str. PEST]	Glycoside hydrolase, family 1	carbohydrate metabolism;hydrolase activity											-0.376965	0.711594			-0.469522			0.402157
AAEL001226	conserved hypothetical protein	D					PREDICTED: similar to reverse transcriptase [Danio rerio]	Retrotransposon gag protein
AAEL001227	sidestep protein	D				GO:0005886,GO:0007165	PREDICTED: similar to ENSANGP00000015183 [Apis mellifera]	Vascular endothelial growth factor receptor, VEGFR;Immunoglobulin V-set;Immunoglobulin;CD80-like C2-set immunoglobulin;Fibronectin, type III;Immunoglobulin-like	plasma membrane;signal transduction
AAEL001228	myelin transcription factor 1, myt1	RTT				GO:0003700,GO:0005634,GO:0006355,GO:0008270	PREDICTED: similar to CG32778-PA [Apis mellifera]	Zinc finger, C2HC-type	transcription factor activity;nucleus;regulation of transcription\, DNA-dependent;zinc ion binding
AAEL001229	metalloproteinase, putative	PROT				GO:0006508,GO:0008533	ENSANGP00000010588 [Anopheles gambiae str. PEST]	Peptidase M, neutral zinc metallopeptidases, zinc-binding site;Peptidase M12A, astacin	proteolysis;astacin activity
AAEL001230	myelin transcription factor 1, myt1	RTT				GO:0000166,GO:0003700,GO:0005215,GO:0005623,GO:0005634,GO:0006091,GO:0006139,GO:0006350,GO:0006811,GO:0009058,GO:0016787,GO:0043234,GO:0050789	ENSANGP00000017744 [Anopheles gambiae str. PEST]	Zinc finger, C2HC-type	nucleotide binding;transcription factor activity;transporter activity;cell;nucleus;generation of precursor metabolites and energy;nucleobase\, nucleoside\, nucleotide and nucleic acid metabolism;transcription;ion transport;biosynthesis;hydrolase activity;
AAEL001231	MIND-MELD/ADAM	D				GO:0007165,GO:0008233,GO:0009607,GO:0019538	ENSANGP00000005363 [Anopheles gambiae str. PEST]	EGF-like region;Disintegrin;Peptidase M12B, propeptide;Peptidase M12B, ADAM/reprolysin;EGF, extracellular;EGF-like, type 3	signal transduction;peptidase activity;response to biotic stimulus;protein metabolism
AAEL001232	tubulointerstitial nephritis antigen	M				GO:0008233,GO:0019538	ENSANGP00000020785 [Anopheles gambiae str. PEST]	Peptidase, cysteine peptidase active site;Peptidase C1A, papain C-terminal	peptidase activity;protein metabolism												-1.08992	0.465696	0.866794	-0.243667	0.243432		0.452538
AAEL001233	hypothetical protein	I				GO:0004252,GO:0006508	ENSANGP00000017164 [Anopheles gambiae str. PEST]	Peptidase S1 and S6, chymotrypsin/Hap;Peptidase S1A, chymotrypsin	serine-type endopeptidase activity;proteolysis
AAEL001234	trypsin	DIG				GO:0004252,GO:0006508			serine-type endopeptidase activity;proteolysis							-0.0675968
AAEL001235	palmitoyl-protein thioesterase	D				GO:0005764,GO:0006412,GO:0006464,GO:0016787,GO:0019538	ENSANGP00000016617 [Anopheles gambiae str. PEST]	Palmitoyl protein thioesterase;Esterase/lipase/thioesterase	lysosome;protein biosynthesis;protein modification;hydrolase activity;protein metabolism
AAEL001236	conserved hypothetical protein	D					24 kDa salivary protein [Phlebotomus ariasi]
AAEL001237	conserved hypothetical protein	U					ENSANGP00000028035 [Anopheles gambiae str. PEST]
AAEL001238	bap28	D					ENSANGP00000017181 [Anopheles gambiae str. PEST]	Aminotransferase, class-II;BP28, C-terminal
AAEL001239	cation efflux protein/ zinc transporter	TRP				GO:0005215,GO:0005623,GO:0006811,GO:0008233,GO:0019538	ENSANGP00000006521 [Anopheles gambiae str. PEST]	Ribosomal protein S8;Cation efflux protein	transporter activity;cell;ion transport;peptidase activity;protein metabolism												-0.264734	-0.952408			-0.573932	0.168396	0.172384
AAEL001240	chaoptin	I(LRR)				GO:0004672,GO:0004872,GO:0006464,GO:0007165,GO:0007267,GO:0007275,GO:0007582,GO:0009607	ENSANGP00000017229 [Anopheles gambiae str. PEST]	Leucinech repeat;Leucinech repeat, typical subtype	protein kinase activity;receptor activity;protein modification;signal transduction;cell-cell signaling;development;physiological process;response to biotic stimulus
AAEL001241	conserved hypothetical protein	D					ENSANGP00000020375 [Anopheles gambiae str. PEST]	Phosphatidylinositol-specific phospholipase C, X region
AAEL001242	ribosomal pseudouridine synthase	RTT				GO:0003723,GO:0003824,GO:0006139,GO:0009058,GO:0016787	ENSANGP00000026660 [Anopheles gambiae str. PEST]	Phosphopantetheine attachment site;Pseudouridine synthase, Rlu;Pseudouridine synthase	RNA binding;catalytic activity;nucleobase\, nucleoside\, nucleotide and nucleic acid metabolism;biosynthesis;hydrolase activity															-0.160709
AAEL001243	growth factor independence	D				GO:0003700,GO:0005488,GO:0005634,GO:0006350,GO:0007165,GO:0007275,GO:0008283,GO:0009653,GO:0016043,GO:0030154,GO:0030528,GO:0050789		Zinc finger, C2H2-type;Zinc finger, C2H2-subtype	transcription factor activity;binding;nucleus;transcription;signal transduction;development;cell proliferation;morphogenesis;cell organization and biogenesis;cell differentiation;transcription regulator activity;regulation of biological process
AAEL001244	conserved hypothetical protein	D				GO:0007165,GO:0030234	CG30115-PD, isoform D [Drosophila melanogaster]	DH;Pleckstrin-like	signal transduction;enzyme regulator activity				-0.6134	0.126391	0.330232	-0.378156						0.338988
AAEL001245	heterogeneous nuclear ribonucleoprotein	RTT				GO:0003723,GO:0005634,GO:0006139,GO:0006350,GO:0006412,GO:0007049,GO:0007165,GO:0008219,GO:0015031,GO:0016043,GO:0050789	ENSANGP00000025834 [Anopheles gambiae str. PEST]	KH, type 1	RNA binding;nucleus;nucleobase\, nucleoside\, nucleotide and nucleic acid metabolism;transcription;protein biosynthesis;cell cycle;signal transduction;cell death;protein transport;cell organization and biogenesis;regulation of biological process
AAEL001246	Thymidylate kinase, putative	D				GO:0000166,GO:0006139,GO:0009058,GO:0016301			nucleotide binding											0.376747	-0.567477	0.125709		-0.347875	-0.509966	-0.318419	0.316169
AAEL001247	conserved hypothetical protein	D					ENSANGP00000018311 [Anopheles gambiae str. PEST]	Zinc finger, C2H2-type				-0.164406	-0.318887	-0.48646	-0.695027	-0.479476	-0.617326	-0.26013	-0.450458	-0.133858		-0.164515	-0.377321	-0.292683	-0.396464	-0.285217	-0.180116
AAEL001248	hypothetical protein	U
AAEL001249	conserved hypothetical protein	U					ENSANGP00000017716 [Anopheles gambiae str. PEST]													0.275265	0.381499		-0.170858	0.307404	0.158617	-0.355878
AAEL001250	conserved hypothetical protein	U					ENSANGP00000022233 [Anopheles gambiae str. PEST]
AAEL001251	nsfl1 cofactor P47	D				GO:0006996,GO:0009653,GO:0016043,GO:0030154			organelle organization and biogenesis			0.219085	0.145075	0.148897	0.125454	0.145118	0.257907	-0.0648894	0.478613	-0.17599	0.240441	0.150144	-0.219085	0.364046	0.210997	0.1268	0.139188
AAEL001252	rap1 gtpase-gdp dissociation stimulator	D				GO:0005515,GO:0007165,GO:0030234	ENSANGP00000015784 [Anopheles gambiae str. PEST]		protein binding;signal transduction;enzyme regulator activity			0.12626	-0.458461	-1.29501		-0.428168		-0.368315	-1.47712				-0.12626
AAEL001253	hypothetical protein	U					PREDICTED: similar to KIAA1009 protein [Danio rerio]
AAEL001254	conserved hypothetical protein	U					AT29009p [Drosophila melanogaster]															-0.0995142		0.128912		-0.281765
AAEL001255	hypothetical protein	D					PREDICTED: similar to Gps2-prov protein [Apis mellifera]
AAEL001256	hypothetical protein	U					ENSANGP00000027093 [Anopheles gambiae str. PEST]
AAEL001257	sugar transporter	TRP				GO:0005215,GO:0005623,GO:0005975,GO:0006810	ENSANGP00000007253 [Anopheles gambiae str. PEST]	Sugar transporter superfamily;Sugar transporter;General substrate transporter;Major facilitator superfamily MFS_1;Major facilitator superfamily	transporter activity;cell;carbohydrate metabolism;transport												0.231822	-0.283342		0.382208	0.126643
AAEL001258	hypothetical protein	U					ENSANGP00000027093 [Anopheles gambiae str. PEST]
AAEL001259	hypothetical protein	U					nucleoprotein N [Bovine ephemeral fever virus]
AAEL001260	conserved hypothetical protein	D				GO:0005634,GO:0005654,GO:0006350,GO:0016740,GO:0030528,GO:0043234	ENSANGP00000017882 [Anopheles gambiae str. PEST]		nucleus;nucleoplasm;transcription;transferase activity;transcription regulator activity;protein complex			-0.0375289	0.153863	0.365369	0.110059	0.182631			0.283237	0.0878628	0.274308	0.280975	0.0895467	0.371515	0.241519	0.411711	0.202567
AAEL001261	hypothetical protein	U																		-0.561969	-0.69663	-0.71869	-1.27814	-0.506949	-0.172197	-0.825473	-0.510015
AAEL001262	conserved hypothetical protein	U
AAEL001263	predicted protein	U					GA10952-PA [Drosophila pseudoobscura]
AAEL001264	conserved hypothetical protein	U										0.133207	0.198799		-0.291791			0.0740371	-0.0843209	0.111303	-0.299809	-0.209235	-0.386271	-0.292661	-0.162566		-0.39559
AAEL001265	conserved hypothetical protein	U					ENSANGP00000027093 [Anopheles gambiae str. PEST]
AAEL001266	nsfl1 cofactor P47	D					ENSANGP00000009984 [Anopheles gambiae str. PEST]	SEP;UBX				-0.362344	-0.448678	-0.266914	-0.36932	-0.805879	-0.474757	-0.603434	-0.0744427	-0.520591	-0.540198	-0.399215		-0.625201	-0.514421	-0.550336	0.0339954
AAEL001267	hypothetical protein	D				GO:0019013	nucleoprotein N [Bovine ephemeral fever virus]		viral nucleocapsid
AAEL001268	conserved hypothetical protein	TRP				GO:0004871,GO:0005102,GO:0005216,GO:0005623,GO:0006811,GO:0007610,GO:0009605,GO:0009628	ENSANGP00000001193 [Anopheles gambiae str. PEST]	Ankyrin;Ion transport;Cation (not K+) channel, TM region	signal transducer activity;receptor binding;ion channel activity;cell;ion transport;behavior;response to external stimulus;response to abiotic stimulus
AAEL001269	anion exchange protein 2, slc4a2	CS				GO:0005215,GO:0005623,GO:0006811,GO:0007010,GO:0019725	ENSANGP00000005913 [Anopheles gambiae str. PEST]	HCO3- transporter, eukaryote;HCO3-transporter	transporter activity;cell;ion transport;cytoskeleton organization and biogenesis;cell homeostasis
AAEL001270	conserved hypothetical protein	U					ENSANGP00000009931 [Anopheles gambiae str. PEST]
AAEL001271	conserved hypothetical protein	U					ENSANGP00000018284 [Anopheles gambiae str. PEST]													-0.116805	-0.085439				0.115708	-0.367245
AAEL001272	hypothetical protein	D				GO:0004872,GO:0005216,GO:0005623,GO:0005886,GO:0006811,GO:0043234			receptor activity;ion channel activity;cell;plasma membrane;ion transport;protein complex
AAEL001273	Sec24B protein, putative	M				GO:0005515,GO:0005794,GO:0006810,GO:0015031,GO:0016023,GO:0016043	ENSANGP00000015751 [Anopheles gambiae str. PEST]	Phosphopantetheine attachment site;Zinc finger, Sec23/Sec24-type;Sec23/Sec24 trunk region;Sec23/Sec24 beta-sandwich;Sec23/Sec24 helical region;Gelsolin region	protein binding;Golgi apparatus;transport;protein transport;cytoplasmic membrane-bound vesicle;cell organization and biogenesis			0.390423	-0.302603	0.0863253	-0.152828	0.265318	0.260243	-0.19642	-0.118943	0.380856	0.614889	-0.180927		0.540299	0.35509	0.289037	-0.248679
AAEL001274	hypothetical protein	D					glycinech protein-like [Oryza sativa (japonica cultivar-group)]						-0.807469	-0.471548	-0.439319	-0.626675	-0.341933		-0.717348	-0.574025		1.39847		1.09625		1.7616	0.357442
AAEL001275	ef-hand protein nucb1	D				GO:0003677,GO:0005509,GO:0005794	calcium binding EF-hand protein [Drosophila melanogaster]	Calcium-binding EF-hand;Flagellar calcium-binding protein (calflagin)	DNA binding;calcium ion binding;Golgi apparatus				0.213658
AAEL001276	conserved hypothetical protein	D				GO:0030234	ENSANGP00000001275 [Anopheles gambiae str. PEST]	Proteinase inhibitor I4, serpin;WD-40 repeat	enzyme regulator activity
AAEL001277	arf gtpase-activating protein	D				GO:0006810,GO:0015031,GO:0016043,GO:0030234,GO:0050789	ENSANGP00000007262 [Anopheles gambiae str. PEST]	Arf GTPase activating protein;Gap junction alpha-9 protein (Cx36);Eggshell protein	transport;protein transport;cell organization and biogenesis;enzyme regulator activity;regulation of biological process
AAEL001278	hypothetical protein	U					ENSANGP00000027093 [Anopheles gambiae str. PEST]
AAEL001279	merozoite surface protein, putative	D				GO:0003676,GO:0003677,GO:0003723,GO:0005488,GO:0005634,GO:0005694,GO:0043234	ENSANGP00000013076 [Anopheles gambiae str. PEST]	Zinc finger, C2H2-type	nucleic acid binding			-0.334159	-0.338757	-0.648814	0.0130452	-0.403853		0.0714739	0.514152	-0.355353	-0.234266	-0.698031	-0.200571	-0.435075	-0.256067	0.17776	-0.212084
AAEL001280	28S ribosomal protein S15, mitochondrial precursor	RTT				GO:0005198,GO:0005739,GO:0005840,GO:0006412,GO:0040007,GO:0050789	ENSANGP00000017652 [Anopheles gambiae str. PEST]	Ribosomal protein S15	structural molecule activity;mitochondrion;ribosome;protein biosynthesis;growth;regulation of biological process			0.193738	0.342857	0.750884	0.257021	0.385588	-0.126532		0.57429	-0.11564	-0.298883	-0.244959					-0.226015
AAEL001281	hypothetical protein	U																		-1.20304	-1.3634			-1.29789	-0.98886	-0.224715	0.205483
AAEL001282	hypothetical protein	RTT					RNA-binding protein, putative [Theileria annulata]													0.247492	-0.0969269	0.0881449		0.105079		0.0875277	-0.176328
AAEL001283	conserved hypothetical protein	D				GO:0005886,GO:0016787,GO:0043234	ENSANGP00000020349 [Anopheles gambiae str. PEST]	WD-40 repeat	plasma membrane;hydrolase activity;protein complex
AAEL001284	hypothetical protein	U					merozoite surface antigen 2 [Babesia bovis]
AAEL001285	conserved hypothetical protein	U
AAEL001286	predicted protein	U					ENSANGP00000027093 [Anopheles gambiae str. PEST]
AAEL001287	conserved hypothetical protein	D				GO:0000074,GO:0003700,GO:0005667,GO:0006355	takeout like protein [Phormia regina]	Hormone binding	regulation of progression through cell cycle											-0.519588	-0.162318	0.116714	-0.59286		0.117834	-0.456853	0.760425
AAEL001288	cytochrome P450	REDOX/STRESS/MIT				GO:0003824,GO:0005489,GO:0005623,GO:0006118	ENSANGP00000003535 [Anopheles gambiae str. PEST]	Cytochrome P450;E-class P450, group I;E-class P450, group IV;E-class P450, group II;B-class P450	catalytic activity;electron transporter activity;cell;electron transport
AAEL001289	permease, putative	TRP				GO:0005215,GO:0006810,GO:0016021	ENSANGP00000024557 [Anopheles gambiae str. PEST]	Sugar transporter superfamily;Proteinase inhibitor I4, serpin;Sugar transporter;Tetrahydrofolate dehydrogenase/cyclohydrolase;General substrate transporter;Major facilitator superfamily MFS_1;Major facilitator superfamily	transporter activity;transport;integral to membrane
AAEL001290	conserved hypothetical protein	U					RH04437p [Drosophila melanogaster]	Insect cuticle protein
AAEL001291	conserved hypothetical protein	D					ENSANGP00000014557 [Anopheles gambiae str. PEST]	Hormone binding												-0.625624	-0.68106	0.163969			0.395203	-0.613696	0.268604
AAEL001292	cytochrome P450	REDOX/STRESS/MIT				GO:0003824,GO:0005489,GO:0005623,GO:0006118	ENSANGP00000003535 [Anopheles gambiae str. PEST]	Cytochrome P450;E-class P450, group I;E-class P450, group IV;E-class P450, group II;B-class P450	catalytic activity;electron transporter activity;cell;electron transport
AAEL001293	conserved hypothetical protein	D				GO:0005215,GO:0005488,GO:0005622,GO:0006810,GO:0008152,GO:0019538			transporter activity				-0.350231	-0.0785402	-0.140259	0.304374	-0.450349	0.302981	-0.296976		-0.638449	-0.612553			-0.777914	-0.464097
AAEL001294	conserved hypothetical protein	U																		-0.516021	-0.321094	0.260647	-0.671516		-0.122902	-0.982204	0.504916
AAEL001295	conserved hypothetical protein	U					PREDICTED: similar to takeout like protein [Apis mellifera]	Hormone binding				-0.235978	0.281902	0.117723	-0.0300921	-0.404568		-0.222757	0.0594678	-0.276115	0.190227	0.920627	0.235978	-0.203301	0.187172	-0.197257	0.875799
AAEL001296	hypothetical protein	D				GO:0005215,GO:0005515,GO:0005623,GO:0005635,GO:0005856,GO:0006810,GO:0007010,GO:0007275,GO:0009653,GO:0016043,GO:0016787,GO:0030154,GO:0043234	GA14293-PA [Drosophila pseudoobscura]		transporter activity;protein binding;cell;nuclear envelope;cytoskeleton;transport;cytoskeleton organization and biogenesis;development;morphogenesis;cell organization and biogenesis;hydrolase activity;cell differentiation;protein complex			-0.119208	-0.172623		0.294994			0.11239	-0.504905		-0.387899		0.119208	0.15006	-0.400228	-0.215487	-0.353581
AAEL001297	conserved hypothetical protein	D				GO:0005215,GO:0005488,GO:0005856,GO:0006810,GO:0008152,GO:0019538,GO:0043234	CG5973-PB, isoform B [Drosophila melanogaster]	Cellular retinaldehyde binding/alpha-tocopherol transport;Cellular retinaldehyde-binding/triple function, C-terminal	transporter activity;binding;cytoskeleton;transport;metabolism;protein metabolism;protein complex
AAEL001298	hypothetical protein	D					PREDICTED: similar to predicted CDS, reverse transcriptase like family member (4D351), partial [Strongylocentrotus purpuratus]
AAEL001299	conserved hypothetical protein	D				GO:0004872,GO:0005886,GO:0007165	Ptclated CG11212-PA [Drosophila melanogaster]	Phosphopantetheine attachment site;Acriflavin resistance protein;Patched;Sterol-sensing 5TM box	receptor activity;plasma membrane;signal transduction
AAEL001300	conserved hypothetical protein	U					ENSANGP00000018057 [Anopheles gambiae str. PEST]					0.256362	0.415808		0.140115	0.303647	0.547993		0.158695	-0.114513	0.224612		-0.347834	0.016636	-0.0540789	-0.140749	-0.178374
AAEL001301	conserved hypothetical protein	D				GO:0005215,GO:0005488,GO:0005622,GO:0006810,GO:0008152,GO:0019538	ENSANGP00000022743 [Anopheles gambiae str. PEST]	Cellular retinaldehyde binding/alpha-tocopherol transport;Cellular retinaldehyde-binding/triple function, C-terminal	transporter activity;binding;intracellular;transport;metabolism;protein metabolism			-1.46453		-0.616695	-0.916806	-0.814614		0.836449	1.78385				1.46453
AAEL001302	expressed protein (HR39)	D
AAEL001303	Odorant receptor 13a, putative	CSR				GO:0004984,GO:0005549,GO:0007608,GO:0016020	ENSANGP00000021055 [Anopheles gambiae str. PEST]	Olfactory receptor, Drosophila	olfactory receptor activity;odorant binding;sensory perception of smell;membrane
AAEL001304	nuclear hormone receptor ftz-f1 beta	D				GO:0003677,GO:0003700,GO:0004872,GO:0005515,GO:0005634,GO:0006350,GO:0007049,GO:0007165,GO:0030528,GO:0050789	ENSANGP00000027089 [Anopheles gambiae str. PEST]	Nuclear hormone receptor, DNA-binding;Steroid hormone receptor;Vitamin D receptor;Nuclear hormone receptor, ligand-binding	DNA binding;transcription factor activity;receptor activity;protein binding;nucleus;transcription;cell cycle;signal transduction;transcription regulator activity;regulation of biological process
AAEL001305	conserved hypothetical protein	U					ENSANGP00000026739 [Anopheles gambiae str. PEST]														0.024592	-0.117392			-0.287542		-0.165017
AAEL001306	conserved hypothetical protein	D					ENSANGP00000014557 [Anopheles gambiae str. PEST]	Hormone binding													-0.595697			-0.464458	-0.626479	-0.751322
AAEL001307	SEC14, putative	D				GO:0005215,GO:0005488,GO:0005622,GO:0006810,GO:0008152,GO:0019538		Cellular retinaldehyde binding/alpha-tocopherol transport;Cellular retinaldehyde-binding/triple function, C-terminal	transporter activity;binding;intracellular;transport;metabolism;protein metabolism			0.488292	-0.47482	0.965739	-0.275212	0.475134	-0.174158	0.850952	0.31756
AAEL001308	CRAL/TRIO domain-containing protein	TRP				GO:0005215,GO:0005488,GO:0005856,GO:0006810,GO:0008152,GO:0019538,GO:0043234	CG5973-PB, isoform B [Drosophila melanogaster]	Cellular retinaldehyde binding/alpha-tocopherol transport;Cellular retinaldehyde-binding/triple function, C-terminal	transporter activity;binding;cytoskeleton;transport;metabolism;protein metabolism;protein complex											-1.05552	-0.624528	-0.148363	-0.913352	-0.353989	-0.584975		0.437223
AAEL001309	conserved hypothetical protein	D					ENSANGP00000014557 [Anopheles gambiae str. PEST]	Hormone binding
AAEL001310	Odorant receptor 92a, putative	CSR				GO:0004984,GO:0005549,GO:0007608,GO:0016020	ENSANGP00000021055 [Anopheles gambiae str. PEST]	Olfactory receptor, Drosophila	olfactory receptor activity;odorant binding;sensory perception of smell;membrane				-0.684336						-0.651413								-0.386949
AAEL001311	hypothetical protein	D					ENSANGP00000019088 [Anopheles gambiae str. PEST]	Vacuolating cytotoxin;Hormone binding														0.291445			0.220851		0.556855
AAEL001312	cytochrome P450	REDOX/STRESS/MIT				GO:0003824,GO:0005489,GO:0005623,GO:0006118	ENSANGP00000003535 [Anopheles gambiae str. PEST]	Cytochrome P450;E-class P450, group I;E-class P450, group IV;E-class P450, group II;B-class P450	catalytic activity;electron transporter activity;cell;electron transport				0.465862			0.200072	0.581487	2.26764	0.274759							3.74569	0.65411
AAEL001313	conserved hypothetical protein	U					ENSANGP00000014563 [Anopheles gambiae str. PEST]
AAEL001314	conserved hypothetical protein	U					PREDICTED: similar to CG17059-PA [Canis familiaris]								0.127924			-0.261486	0.161754		0.264416				0.134984		0.275384
AAEL001315	conserved hypothetical protein	D				GO:0003676,GO:0005634,GO:0008270	ENSANGP00000016562 [Anopheles gambiae str. PEST]	Zinc finger, C2H2-type;Peptidase M, neutral zinc metallopeptidases, zinc-binding site;Zinc finger, C2H2-subtype	nucleic acid binding;nucleus;zinc ion binding			0.0802395	-0.491785	-0.303649	-0.453396	-0.474066						-0.245816		0.135406		0.274076	0.0998583
AAEL001316	conserved hypothetical protein	U					ENSANGP00000025618 [Anopheles gambiae str. PEST]
AAEL001317	DEAD box ATP-dependent RNA helicase	RTT				GO:0000166,GO:0003676,GO:0003824,GO:0006139,GO:0016787	ENSANGP00000015460 [Anopheles gambiae str. PEST]	ATP-dependent helicase, DEAD-box;DEAD/DEAH box helicase, N-terminal;Helicase, C-terminal;DEAD/DEAH box helicase	nucleotide binding;nucleic acid binding;catalytic activity;nucleobase\, nucleoside\, nucleotide and nucleic acid metabolism;hydrolase activity			0.0667281	-0.157892	-0.0743953	-0.233591	-0.0846771		-0.0850957	0.0739674	0.187779		0.185415		0.287773	0.172074	0.319878	-0.125443
AAEL001318	CRAL/TRIO domain-containing protein	TRP				GO:0005215,GO:0005488,GO:0005856,GO:0006810,GO:0008152,GO:0019538,GO:0043234	GA19271-PA [Drosophila pseudoobscura]	Cellular retinaldehyde binding/alpha-tocopherol transport;Cellular retinaldehyde-binding/triple function, C-terminal	transporter activity;binding;cytoskeleton;transport;metabolism;protein metabolism;protein complex
AAEL001319	hypothetical protein	U					RH04437p [Drosophila melanogaster]
AAEL001320	cytochrome P450	REDOX/STRESS/MIT				GO:0003824,GO:0005489,GO:0005623,GO:0006118	ENSANGP00000003535 [Anopheles gambiae str. PEST]	Cytochrome P450;E-class P450, group I;E-class P450, group IV;E-class P450, group II;B-class P450	catalytic activity;electron transporter activity;cell;electron transport
AAEL001321	Transcription factor dp	RTT				GO:0000003,GO:0003677,GO:0003700,GO:0005515,GO:0005634,GO:0005654,GO:0005694,GO:0006259,GO:0006350,GO:0007049,GO:0008219,GO:0009653,GO:0030528,GO:0043234,GO:0050789	ENSANGP00000018946 [Anopheles gambiae str. PEST]	Transcription factor E2F/dimerisation partner (TDP)	reproduction;DNA binding;transcription factor activity;protein binding;nucleus;nucleoplasm;chromosome;DNA metabolism;transcription;cell cycle;cell death;morphogenesis;transcription regulator activity;protein complex;regulation of biological process
AAEL001322	hypothetical protein	U					GA15636-PA [Drosophila pseudoobscura]										0.379734	0.274367		0.380541	0.187732	0.17823			0.163325	0.178804	-0.139421
AAEL001323	conserved hypothetical protein	U					PREDICTED: similar to takeout like protein [Apis mellifera]	Hormone binding												-0.657456	-0.682899		-1.01088	-0.695318	-0.509771	-1.09009
AAEL001324	replication factor C large subunit, putative	RTT				GO:0000166,GO:0003677,GO:0003824,GO:0005634,GO:0005694,GO:0006259,GO:0016740,GO:0016787,GO:0043234	Germ line transcription factor 1 CG1119-PA, isoform A [Drosophila melanogaster]	Disease resistance protein;BRCT;AAA ATPase, central region;Replication factor C conserved region	nucleotide binding;DNA binding;catalytic activity;nucleus;chromosome;DNA metabolism;transferase activity;hydrolase activity;protein complex				0.0972029			0.0985981				-0.287008	0.0560186			0.170643	0.236059	0.231732	-0.239135
AAEL001325	conserved hypothetical protein	U																		-0.45063		-0.262537		-0.0900574	0.281449	-0.108911	0.12589
AAEL001326	conserved hypothetical protein	U					ENSANGP00000018479 [Anopheles gambiae str. PEST]	Like-Sm ribonucleoprotein, core
AAEL001327	conserved hypothetical protein	U																		1.97006		1.1154		0.508759	0.646605	0.98534	0.6856
AAEL001328	hypothetical protein	U					ENSANGP00000016687 [Anopheles gambiae str. PEST]													-0.217943		-0.234918	0.593794	0.442391	0.830775		-0.679581
AAEL001329	mitochondrial carrier protein	REDOX/STRESS/MIT				GO:0005215,GO:0005488,GO:0005623,GO:0005739,GO:0006810	ENSANGP00000020264 [Anopheles gambiae str. PEST]	Mitochondrial carrier protein;Adenine nucleotide translocator 1;Mitochondrial brown fat uncoupling protein;Mitochondrial substrate carrier	transporter activity;binding;cell;mitochondrion;transport			-0.895958	-1.22884	-0.712357	-0.53276	-0.903315	-1.23859	-0.77295	-2.07659	0.0743635	-0.309371	-0.602187	-0.579683	-0.328094	-0.429496	-0.244396	-1.31717
AAEL001330	zinc metalloproteinase	PROT				GO:0005488,GO:0005623,GO:0008233,GO:0019538,GO:0043234	CG6696-PA [Drosophila melanogaster]	Peptidase M, neutral zinc metallopeptidases, zinc-binding site;Peptidase M12A, astacin	binding;cell;peptidase activity;protein metabolism;protein complex
AAEL001331	mannose-1-phosphate guanyltransferase	M				GO:0005975,GO:0009058,GO:0016740			carbohydrate metabolism			0.0885042	0.444594	0.216659	-0.133112	0.388025	0.478024		0.542539	-0.173616	0.238577	-0.261544	-0.1257			-0.274754	0.137728
AAEL001332	conserved hypothetical protein	U					ENSANGP00000020285 [Anopheles gambiae str. PEST]	HEAT												-0.409731	-0.94571	-0.858501		-0.331783	-0.520957	-0.317002	-0.635651
AAEL001333	protein arginine n-methyltransferase 1, putative	D				GO:0006464,GO:0016740	ENSANGP00000014289 [Anopheles gambiae str. PEST]	Methyltransferase type 11;SAM (and some other nucleotide) binding motif	protein modification;transferase activity
AAEL001334	geranylgeranyl transferase type ii beta subunit	D				GO:0006412,GO:0006464,GO:0016740	ENSANGP00000020381 [Anopheles gambiae str. PEST]	C-type lectin;Prenyltransferase/squalene oxidase	protein biosynthesis;protein modification;transferase activity				0.52491								0.280919
AAEL001335	hypothetical protein	D					capsid scaffold protein [Cercopithecine herpesvirus 16]
AAEL001336	charged multivesicular body protein 2a	D				GO:0005554	ENSANGP00000020919 [Anopheles gambiae str. PEST]	Snf7	molecular function unknown				0.0756218	-0.127394	-0.108385	0.0799609	0.283579	-0.187811	-0.100912	0.295548	0.426719	0.358054	0.347928	0.344466	0.499755	0.244638	0.32152
AAEL001337	band 4.1-like protein 2, putative	CS				GO:0003779,GO:0005198,GO:0005623,GO:0005737,GO:0005856,GO:0007010,GO:0008092,GO:0030234	ENSANGP00000020346 [Anopheles gambiae str. PEST]	Band 4.1;Ezrin/radixin/moesin ERM	actin binding;structural molecule activity;cell;cytoplasm;cytoskeleton;cytoskeleton organization and biogenesis;cytoskeletal protein binding;enzyme regulator activity
AAEL001338	helix-loop-helix transcription factor	D					ENSANGP00000021383 [Anopheles gambiae str. PEST]
AAEL001339	conserved hypothetical protein	D				GO:0008092	ENSANGP00000020325 [Anopheles gambiae str. PEST]	RNA polymerase II associated, Paf1	cytoskeletal protein binding				0.156486		-0.242402		-0.247		-0.364852	-0.291666	0.234666	-0.191264	-0.299602		-0.297875	-0.0613907	-0.328698
AAEL001340	conserved hypothetical protein	D					ENSANGP00000020337 [Anopheles gambiae str. PEST]	Chaperonin Cpn60
AAEL001341	conserved hypothetical protein	U					ENSANGP00000016668 [Anopheles gambiae str. PEST]
AAEL001342	conserved hypothetical protein	D				GO:0004984,GO:0005549,GO:0007608,GO:0016020	ENSANGP00000024081 [Anopheles gambiae str. PEST]	Rhodopsin-like GPCR superfamily;Olfactory receptor, Drosophila	olfactory receptor activity;odorant binding;sensory perception of smell;membrane
AAEL001343	conserved hypothetical protein	U					ENSANGP00000015979 [Anopheles gambiae str. PEST]
AAEL001344	pairle protein odd-paired	D				GO:0000003,GO:0003700,GO:0005488,GO:0005634,GO:0006350,GO:0007275,GO:0007582,GO:0008283,GO:0009790,GO:0030528,GO:0050789	ENSANGP00000009802 [Anopheles gambiae str. PEST]	Phosphopantetheine attachment site;Zinc finger, C2H2-type;Antifreeze protein, type I;Zinc finger, C2H2-subtype	reproduction;transcription factor activity;binding;nucleus;transcription;development;physiological process;cell proliferation;embryonic development;transcription regulator activity;regulation of biological process
AAEL001345	conserved hypothetical protein	U					ENSANGP00000020960 [Anopheles gambiae str. PEST]	Protein of unknown function DM16
AAEL001346	conserved hypothetical protein	U					ENSANGP00000016759 [Anopheles gambiae str. PEST]
AAEL001347	conserved hypothetical protein	D				GO:0003676,GO:0005488,GO:0005634	ENSANGP00000020296 [Anopheles gambiae str. PEST]	Zinc finger, C2H2-type;Zinc finger, C2H2-subtype	nucleic acid binding;binding;nucleus
AAEL001348	conserved hypothetical protein	D					NAM-like protein -like [Oryza sativa (japonica cultivar-group)]													1.79708		1.12224		0.622054	0.612201	0.845113	0.650484
AAEL001349	zinc finger protein	D				GO:0003676,GO:0005488,GO:0005634,GO:0006139,GO:0006350,GO:0008283,GO:0030528,GO:0050789	ENSANGP00000009800 [Anopheles gambiae str. PEST]	Zinc finger, C2H2-type;Zinc finger, C2H2-subtype	nucleic acid binding;binding;nucleus;nucleobase\, nucleoside\, nucleotide and nucleic acid metabolism;transcription;cell proliferation;transcription regulator activity;regulation of biological process
AAEL001350	hypothetical protein	U					hypothetical protein 298.t00006 [Entamoeba histolytica HM-1:IMSS]						0.580255								0.237201	-0.221684				-0.448995	-0.386009
AAEL001351	hypothetical protein	U
AAEL001352	scaffold attachment factor b	D				GO:0003677,GO:0003723,GO:0005634,GO:0006139,GO:0050789	ENSANGP00000027765 [Anopheles gambiae str. PEST]	Eggshell protein;Antifreeze protein, type I;DNA-binding SAP;RNA-binding region RNP-1 (RNA recognition motif)	DNA binding;RNA binding;nucleus;nucleobase\, nucleoside\, nucleotide and nucleic acid metabolism;regulation of biological process			0.394014	0.261986	0.155586	0.0765004	0.146341	0.211862	0.150386	1.3417	0.999376	0.848031	0.606326	0.397808	0.833171	0.777867	0.789568	0.685486
AAEL001353	rhogef and pleckstrin domain protein	CS				GO:0003779,GO:0005198,GO:0005623,GO:0005737,GO:0005856,GO:0007010,GO:0008092,GO:0030234	GA16310-PA [Drosophila pseudoobscura]	Cytochrome P450;DH;Pleckstrin-like	actin binding;structural molecule activity;cell;cytoplasm;cytoskeleton;cytoskeleton organization and biogenesis;cytoskeletal protein binding;enzyme regulator activity			-0.310228	-0.0680241	-0.353143				-0.274189	-0.868288				0.310228
AAEL001354	conserved hypothetical protein	U					PREDICTED: similar to Ribosomal protein S29 [Apis mellifera]	Protein of unknown function DUF423				0.222894	0.211246	0.28655	0.181782	0.226843	0.339241	0.128994	0.447205		0.130381	0.195803			0.0243834	0.0952451	0.37763
AAEL001355	conserved hypothetical protein	U					ENSANGP00000016748 [Anopheles gambiae str. PEST]													-0.401281	-0.411612	-0.13033		-0.0933885	0.28148	-0.131774	-0.753668
AAEL001356	RNA-binding protein	RTT				GO:0003723,GO:0005515,GO:0005634,GO:0006139,GO:0019538,GO:0043234	ENSANGP00000016046 [Anopheles gambiae str. PEST]	RNA-binding region RNP-1 (RNA recognition motif)	RNA binding;protein binding;nucleus;nucleobase\, nucleoside\, nucleotide and nucleic acid metabolism;protein metabolism;protein complex			0.467709	-0.372992		-0.667105		-0.571832	-0.65486	-0.376033	0.350147	-0.637165	0.499323		0.344284	0.407362	-0.41805
AAEL001357	hypothetical protein	D				GO:0005515,GO:0008270	ENSANGP00000020354 [Anopheles gambiae str. PEST]	Zinc finger, RING-type	protein binding;zinc ion binding				-1.09289	-0.574764	-0.687495	-0.932166	-0.590457	-0.550314	-1.16804	-0.233397	0.21751				-0.303867	-0.542989
AAEL001358	conserved hypothetical protein	U					ENSANGP00000016759 [Anopheles gambiae str. PEST]
AAEL001359	hypothetical protein	U					ENSANGP00000010660 [Anopheles gambiae str. PEST]
AAEL001360	coronin	D				GO:0003779,GO:0003824,GO:0005198,GO:0005856,GO:0007010			actin binding
AAEL001361	Brahma associated protein 170kD, putative	D				GO:0000228,GO:0003676,GO:0003677,GO:0005488,GO:0005515,GO:0005622,GO:0005634,GO:0006350,GO:0030528,GO:0043234,GO:0050789	ENSANGP00000007677 [Anopheles gambiae str. PEST]	ATch interaction region;Prolinech region	nuclear chromosome;nucleic acid binding;DNA binding;binding;protein binding;intracellular;nucleus;transcription;transcription regulator activity;protein complex;regulation of biological process					-0.0989523	0.199473		0.303224	-0.0585812	-0.207277	0.147361	0.314961	0.136969		0.347955	0.15709	0.265706	-0.110926
AAEL001362	hypothetical protein	U										0.352472		0.301054			0.680751	0.68426	0.534301	0.591531	-0.143951		-0.352472	0.343691	0.373753	0.357656	0.306376
AAEL001363	small nuclear ribonucleoprotein Sm D1, putative	RTT				GO:0005634,GO:0005730,GO:0005732,GO:0006139,GO:0006397,GO:0043234,GO:0050789	ENSANGP00000010025 [Anopheles gambiae str. PEST]	Like-Sm ribonucleoprotein, core	nucleus;nucleolus;small nucleolar ribonucleoprotein complex;nucleobase\, nucleoside\, nucleotide and nucleic acid metabolism;mRNA processing;protein complex;regulation of biological process			-0.0940082	0.460586	-0.0576638	-0.134928	-0.257307		-0.181851			0.146552		0.0940082	-0.236499		-0.32	-0.339347
AAEL001364	glucosyl/glucuronosyl transferases	M				GO:0008152,GO:0016758	ENSANGP00000005268 [Anopheles gambiae str. PEST]	Phosphopantetheine attachment site;UDP-glucuronosyl/UDP-glucosyltransferase	metabolism;transferase activity\, transferring hexosyl groups
AAEL001365	glucosyl/glucuronosyl transferases	M				GO:0005975,GO:0006629,GO:0009607,GO:0009628,GO:0016740	ENSANGP00000005268 [Anopheles gambiae str. PEST]	Phosphopantetheine attachment site;UDP-glucuronosyl/UDP-glucosyltransferase	carbohydrate metabolism;lipid metabolism;response to biotic stimulus;response to abiotic stimulus;transferase activity
AAEL001366	conserved hypothetical protein	U					PREDICTED: similar to MIS12 homolog [Apis mellifera]						0.270953	0.432086			0.704518		0.2878	0.306375	0.175885	0.202193		0.238003	0.417309
AAEL001367	type iv inositol 5-phosphatase	TRP				GO:0006810,GO:0007165,GO:0008152,GO:0015031,GO:0016043,GO:0016787	ENSANGP00000010664 [Anopheles gambiae str. PEST]	Endonuclease/exonuclease/phosphatase	transport;signal transduction;metabolism;protein transport;cell organization and biogenesis;hydrolase activity
AAEL001368	kek1	I(LRR)				GO:0000003,GO:0004672,GO:0004872,GO:0005515,GO:0005623,GO:0005886,GO:0006464,GO:0007165,GO:0007267,GO:0007275,GO:0007582,GO:0050789	ENSANGP00000005267 [Anopheles gambiae str. PEST]	Leucinech repeat;Immunoglobulin I-set;Immunoglobulin V-set;Immunoglobulin;Leucinech repeat, typical subtype;Immunoglobulin-like	reproduction;protein kinase activity;receptor activity;protein binding;cell;plasma membrane;protein modification;signal transduction;cell-cell signaling;development;physiological process;regulation of biological process
AAEL001369	conserved hypothetical protein	U																			-0.220109	0.606441		0.0724326			0.297348
AAEL001370	muscle-specific tyrosine kinase receptor	D				GO:0000166,GO:0004672,GO:0004872,GO:0005886,GO:0006464,GO:0007165,GO:0007275	ENSANGP00000007679 [Anopheles gambiae str. PEST]	Kringle;Helix-turn-helix, AraC type;Protein kinase;Tyrosine protein kinase, active site;Tyrosine protein kinase;Frizzled CRD region	nucleotide binding;protein kinase activity;receptor activity;plasma membrane;protein modification;signal transduction;development
AAEL001371	pre-mrna cleavage factor im, 25kD subunit	D				GO:0005654,GO:0006139,GO:0043234			nucleoplasm;nucleobase\, nucleoside\, nucleotide and nucleic acid metabolism;protein complex						-0.0705719			-0.0920371		-0.151653	0.149253	0.281083			0.330458
AAEL001372	sentrin/sumo-specific protease senp7	M				GO:0008233,GO:0019538	ENSANGP00000023666 [Anopheles gambiae str. PEST]	Peptidase C48, SUMO/Sentrin/Ubl1	peptidase activity
AAEL001373	lim homeobox protein	D				GO:0003700,GO:0005488,GO:0005634,GO:0006350,GO:0050789	ENSANGP00000025696 [Anopheles gambiae str. PEST]	Homeobox;LIM, zinc-binding;Helix-turn-helix motif, lambda-like repressor;LIM homeobox	transcription factor activity;binding;nucleus;transcription;regulation of biological process
AAEL001374	flagellar radial spoke protein	D				GO:0005856,GO:0007010,GO:0008092,GO:0043234	ENSANGP00000013556 [Anopheles gambiae str. PEST]	Radial spoke 3	cytoskeleton;cytoskeleton organization and biogenesis;cytoskeletal protein binding;protein complex
AAEL001375	Y-box binding protein	D				GO:0000003,GO:0003676,GO:0003677,GO:0003723,GO:0005634,GO:0006350,GO:0030528,GO:0050789	Y-box protein Ct-p50 [Chironomus tentans]	Cold-shock protein, DNA-binding	reproduction;nucleic acid binding;DNA binding;RNA binding;nucleus;transcription;transcription regulator activity;regulation of biological process			0.47091	0.241318	0.396472	0.10246	-0.180969	0.246349	0.280973	0.0683698		0.118813	-0.255186		-0.119513	-0.224653	-0.175372	-0.317702
AAEL001376	hypothetical protein	U					GA12346-PA [Drosophila pseudoobscura]						-0.202762	-0.37712	-0.185259	-0.308084		-0.165119	-0.473509		-0.0598124	-0.542555		-0.189414	-0.422366	-0.372112	-0.390752
AAEL001377	hypothetical protein	U
AAEL001378	spermine synthase	D				GO:0006519,GO:0009058,GO:0016740	ENSANGP00000029031 [Anopheles gambiae str. PEST]	Spermine synthase;SAM (and some other nucleotide) binding motif	amino acid and derivative metabolism;biosynthesis;transferase activity											0.401393	0.777529	0.635558	0.51471	0.845187	0.645909	0.358933	0.214983
AAEL001379	conserved hypothetical protein	U
AAEL001380	lim homeobox protein	D				GO:0003700,GO:0005488,GO:0005634,GO:0006350,GO:0050789	GA18112-PA [Drosophila pseudoobscura]	LIM, zinc-binding	transcription factor activity;binding;nucleus;transcription;regulation of biological process
AAEL001381	sphingomyelin synthetase	M				GO:0005623,GO:0006629,GO:0009058	ENSANGP00000029645 [Anopheles gambiae str. PEST]	Sterile alpha motif SAM	cell;lipid metabolism;biosynthesis
AAEL001382	small nuclear ribonucleoprotein sm d1	RTT				GO:0003723,GO:0005634,GO:0005730,GO:0006139,GO:0043234			RNA binding;nucleus;nucleolus;nucleobase\, nucleoside\, nucleotide and nucleic acid metabolism;protein complex				-0.162705		-0.130847			-0.233897		0.184082	0.102093	0.285704		0.248072	0.186346		0.263116
AAEL001383	hypothetical protein	U					ENSANGP00000020328 [Anopheles gambiae str. PEST]	Src homology-3
AAEL001384	triple functional domain, trio	D				GO:0005886,GO:0007010,GO:0007165,GO:0007267,GO:0007275,GO:0007582,GO:0009653,GO:0016043,GO:0030154,GO:0030234,GO:0050789	ENSANGP00000020328 [Anopheles gambiae str. PEST]	Spectrin repeat;DH;Pleckstrin-like	plasma membrane;cytoskeleton organization and biogenesis;signal transduction;cell-cell signaling;development;physiological process;morphogenesis;cell organization and biogenesis;cell differentiation;enzyme regulator activity;regulation of biological proce
AAEL001385	conserved hypothetical protein	D				GO:0003676,GO:0004518	ENSANGP00000013507 [Anopheles gambiae str. PEST]	Protein of unknown function DUF292, eukaryotic	nucleic acid binding;nuclease activity			-0.136435	-0.276561	-0.0990041	-0.0824191	-0.257486			-0.153523		0.14707	0.137065	0.136118	0.172297	0.140589
AAEL001386	hypothetical protein	U					ENSANGP00000014458 [Anopheles gambiae str. PEST]
AAEL001387	hypothetical protein	U					GH23617p [Drosophila melanogaster]													0.60128				0.343055	0.531619	0.236733	0.554733
AAEL001388	hypothetical protein	D					ENSANGP00000020391 [Anopheles gambiae str. PEST]	Adenine nucleotide translocator 1;Mitochondrial carrier protein;Mitochondrial brown fat uncoupling protein;Mitochondrial substrate carrier
AAEL001389	conserved hypothetical protein	D				GO:0005488	ENSANGP00000009967 [Anopheles gambiae str. PEST]	Zinc finger, DHHC-type	binding			-0.309896	-0.277017	-0.303569	0.124064	-0.152759	0.135764	-0.311636	-0.379339	0.00786079	-0.0959214	-0.109862	0.309896	0.146301	0.260516	0.259162	-0.270942
AAEL001390	conserved hypothetical protein	D					yxkO [Bacillus subtilis subsp. subtilis str. 168]																				-0.442538
AAEL001391	hypothetical protein	U					ENSANGP00000014168 [Anopheles gambiae str. PEST]
AAEL001392	hypothetical protein	U					hypothetical protein [Yarrowia lipolytica]
AAEL001393	triple functional domain, trio	D				GO:0005886,GO:0007010,GO:0007165,GO:0007267,GO:0007275,GO:0007582,GO:0009653,GO:0016043,GO:0030154,GO:0030234,GO:0050789	ENSANGP00000020328 [Anopheles gambiae str. PEST]	Guanine-nucleotide dissociation stimulator, CDC24;DH;Pleckstrin-like	plasma membrane;cytoskeleton organization and biogenesis;signal transduction;cell-cell signaling;development;physiological process;morphogenesis;cell organization and biogenesis;cell differentiation;enzyme regulator activity;regulation of biological proce					-0.384216
AAEL001394	conserved hypothetical protein	D				GO:0003824,GO:0005488,GO:0005623,GO:0006464,GO:0008152	ENSANGP00000019087 [Anopheles gambiae str. PEST]	Copper type II, ascorbate-dependent monooxygenase;Peptidyl-glycine alpha-amidating monooxygenase	catalytic activity;binding;cell;protein modification;metabolism										0.301068	-0.48469	-1.42168	-1.42912	-0.907304	-1.12297	-0.49841	-0.614847	-0.730785
AAEL001395	suppression of tumorigenicity	D					ENSANGP00000019824 [Anopheles gambiae str. PEST]	ST7
AAEL001396	mandelate racemase	D					ENSANGP00000019149 [Anopheles gambiae str. PEST]
AAEL001397	ribonuclease	RTT				GO:0003723,GO:0004540	CG16940-PB, isoform B [Drosophila melanogaster]	Ribonuclease II and R	RNA binding;ribonuclease activity			-0.111712	0.241356	-0.151703	-0.0791477	-0.196938			-0.185254	-0.510054	-0.646619	-0.22151	0.111712				-0.501731
AAEL001398	guanine nucleotide exchange factor	D					ENSANGP00000009455 [Anopheles gambiae str. PEST]	Src homology-3;Neutrophil cytosol factor 2;DH;Variant SH3				0.408722	-0.0874724	-0.218835			0.433777		0.0431737	0.147912	0.205646		-0.433886	-0.0679407	-0.197978	0.466282	-0.55468
AAEL001399	conserved hypothetical protein	D				GO:0003677	ENSANGP00000019829 [Anopheles gambiae str. PEST]	WD-40 repeat	DNA binding
AAEL001400	DNA-directed RNA polymerases III 12.5 kDa polypeptide, putative	RTT				GO:0003677,GO:0003700,GO:0005654,GO:0006350,GO:0016740,GO:0043234,GO:0050789	ENSANGP00000018390 [Anopheles gambiae str. PEST]	Transcription factor TFIIS;DNA-directed RNA polymerase, M/15 kDa subunit	DNA binding;transcription factor activity;nucleoplasm;transcription;transferase activity;protein complex;regulation of biological process											-0.104959	-0.128366	-0.295682			-0.259224
AAEL001401	conserved hypothetical protein	D					ENSANGP00000019115 [Anopheles gambiae str. PEST]	Leucinech repeat;Nematode reverse transcriptase-like												-0.33523	0.125786	-0.23563		-0.308028	-0.180258	-0.287056	0.742289
AAEL001402	conserved hypothetical protein	D					ENSANGP00000019115 [Anopheles gambiae str. PEST]	Leucinech repeat;Leucinech repeat, typical subtype												-1.23591	-6.22802	-1.07518		-2.09046	-1.87147	-1.02973	-0.564689
AAEL001403	conserved hypothetical protein	U					ENSANGP00000019150 [Anopheles gambiae str. PEST]														-0.220252	0.397907				-0.423961	-0.309698
AAEL001404	conserved hypothetical protein	U					ENSANGP00000026824 [Anopheles gambiae str. PEST]
AAEL001405	clathrin coat assembly protein	TRP				GO:0006810,GO:0006886,GO:0006996,GO:0007267,GO:0007275,GO:0009058,GO:0015031,GO:0016023,GO:0016043,GO:0019748,GO:0030125	ENSANGP00000019053 [Anopheles gambiae str. PEST]	Clathrin adaptor complex, small chain	transport;intracellular protein transport;organelle organization and biogenesis;cell-cell signaling;development;biosynthesis;protein transport;cytoplasmic membrane-bound vesicle;cell organization and biogenesis;secondary metabolism;			-0.0989818	-0.215851	0.312719	0.282052	0.288224		0.227191	0.237307	-0.217444	-0.412993	-0.305101	0.0989818	-0.280876	-0.296953	-0.272953	-0.445686
AAEL001406	conserved hypothetical protein	PROT					ENSANGP00000019141 [Anopheles gambiae str. PEST]	Peptidase M14, carboxypeptidase A					0.63583							-0.298905	0.703867	-0.214234				0.17413	-0.580423
AAEL001407	cdk4/6	D				GO:0000166,GO:0004672,GO:0004871,GO:0005515,GO:0006464,GO:0007005,GO:0007049,GO:0007165,GO:0007275,GO:0008283,GO:0009790,GO:0016049,GO:0050789	ENSANGP00000010338 [Anopheles gambiae str. PEST]	Protein kinase;Serine/threonine protein kinase, active site;Tyrosine protein kinase;JNK MAP kinase	nucleotide binding;protein kinase activity;signal transducer activity;protein binding;protein modification;mitochondrion organization and biogenesis;cell cycle;signal transduction;development;cell proliferation;embryonic development;cell growth;regulation												-0.412501	-0.294483			-0.348492	-0.191466	-0.626428
AAEL001408	hypothetical protein	D					putative polyprotein [Phytophthora infestans]	Immunoglobulin/major histocompatibility complex;Zinc finger, CCHC-type;Integrase, catalytic region
AAEL001409	conserved hypothetical protein	U					ENSANGP00000028319 [Anopheles gambiae str. PEST]						0.525305	0.500878	0.353365	0.38488	-0.238593		0.479826			0.270029
AAEL001410	snf2 histone linker phd ring helicase	D				GO:0000166,GO:0003676,GO:0003677,GO:0003824,GO:0005488,GO:0005622,GO:0006350,GO:0006464,GO:0043234,GO:0050789	ENSANGP00000019059 [Anopheles gambiae str. PEST]	Zinc finger, RING-type;Zinc finger, PHD-type;SNF2lated;Helicase, C-terminal	nucleotide binding;nucleic acid binding;DNA binding;catalytic activity;binding;intracellular;transcription;protein modification;protein complex;regulation of biological process															0.0471216		0.7263
AAEL001411	myosin heavy chain, nonmuscle or smooth muscle	CS				GO:0000003,GO:0000166,GO:0003774,GO:0005198,GO:0005737,GO:0005856,GO:0007049,GO:0007275,GO:0007582,GO:0008092,GO:0008219,GO:0009628,GO:0009653,GO:0009719,GO:0009790,GO:0016043,GO:0016787,GO:0030154,GO:0043234,GO:0050789			reproduction			-0.356537	0.53304	0.142487	0.384373	0.302672	0.142817	-0.275209	0.234616	-0.741909	-0.658132	0.446231		0.300131	0.137211	-0.386812
AAEL001412	conserved hypothetical protein	D				GO:0006412,GO:0045182	ischemia/reperfusion inducible protein [Bombyx mori]		protein biosynthesis;translation regulator activity			0.224212	-0.0782882	0.1598		0.332957			0.561672	0.131517	0.0720497	-0.0722725		0.0986158	-0.0797313
AAEL001413	conserved hypothetical protein	D				GO:0003950,GO:0006471	ENSANGP00000019147 [Anopheles gambiae str. PEST]	Poly(ADPbose) polymerase, catalytic region	NAD+ ADPbosyltransferase activity;protein amino acid ADPbosylation			-0.32052	-0.521971	-0.403751	-0.216041		-0.00864073	-0.172767	0.146968	-0.185824	-0.211841	-0.357199	0.312111	0.124479	0.378947		-0.286016
AAEL001414	conserved hypothetical protein	U												0.105646		0.201186			0.754863	-0.38092	-0.806234	0.354047		0.435499	-0.163927		0.0451713
AAEL001415	hypothetical protein	U
AAEL001416	conserved hypothetical protein	D				GO:0005635	ENSANGP00000009456 [Anopheles gambiae str. PEST]	Regulator of chromosome condensation, RCC1;Lamino-associated polypeptide 2/emerin	nuclear envelope															0.261772		0.544929	-0.226009
AAEL001417	conserved hypothetical protein	D					ENSANGP00000019036 [Anopheles gambiae str. PEST]	Leucinech repeat;Nematode reverse transcriptase-like
AAEL001418	conserved hypothetical protein	D					major allergen Per a 1.0101 [Periplaneta americana]	Insect allergen related
AAEL001419	nocturnin	D				GO:0003676	ENSANGP00000014775 [Anopheles gambiae str. PEST]	Endonuclease/exonuclease/phosphatase	nucleic acid binding			-0.354481	-0.716423	0.176	-0.321598	-0.18511	0.00039292		0.583986	-0.381469	-0.159344	-0.235582	0.350877	-0.309606	-0.0848	-0.240239	-0.324543
AAEL001420	conserved hypothetical protein	D					ENSANGP00000019113 [Anopheles gambiae str. PEST]	Leucinech repeat					-0.613165	-0.369312		-0.556447	-0.553059			-0.890044	-0.919769	-0.800243	-0.692786	-0.483073	-0.231195	-1.43483	-0.359826
AAEL001421	high density lipoprotien binding protein / vigilin	D				GO:0003677,GO:0005634,GO:0005694,GO:0006996,GO:0007582	PREDICTED: similar to GA18708-PA [Apis mellifera]	ATPase, E1-E2 type;KH, type 1	DNA binding;nucleus;chromosome;organelle organization and biogenesis;physiological process			0.0804041	-0.181985	-0.252493	-0.333967	-0.321001	-0.28811	-0.251669	-0.162983	-0.0809395		-0.393867	-0.0804041		-0.201799	-0.242256	-0.338215
AAEL001422	proteasome inhibitor	D				GO:0030234	GA21450-PA [Drosophila pseudoobscura]		enzyme regulator activity			0.383185	0.510479	0.217828	0.578466	0.370095	0.551042		0.536565	0.572019	0.173293	0.238073	0.0492806	0.42098	0.442026	0.325305	0.176073
AAEL001423	acid phosphatase-1	M				GO:0008152,GO:0016787	ENSANGP00000018380 [Anopheles gambiae str. PEST]	Histidine acid phosphatase	metabolism;hydrolase activity			0.61518	0.259257	0.418737	-0.160971		0.259491	0.203915	0.202115				0.381106			-0.0865978
AAEL001424	mitochondrial inner membrane protease subunit	REDOX/STRESS/MIT				GO:0005739,GO:0006464,GO:0008233,GO:0015031,GO:0016043,GO:0019538	ENSANGP00000018428 [Anopheles gambiae str. PEST]	Peptidase S26A, signal peptidase I;Peptidase S24, S26A and S26B	mitochondrion													0.477647		0.526908	0.929626		0.303401
AAEL001425	conserved hypothetical protein	U					ENSANGP00000017919 [Anopheles gambiae str. PEST]					0.675485	0.728179		0.201998	0.199447	0.545712			0.447805	0.257715	-0.0721159		0.185465	0.20935	0.173629	-0.17565
AAEL001426	poly(a)-specific ribonuclease (deadenylation nuclease)	RTT				GO:0005634,GO:0016481,GO:0016564	ENSANGP00000018368 [Anopheles gambiae str. PEST]	Ribonuclease CAF1	nucleus;;
AAEL001427	short-chain dehydrogenase	REDOX/STRESS/MIT				GO:0003824,GO:0005488,GO:0008152	ENSANGP00000016314 [Anopheles gambiae str. PEST]	Glucose/ribitol dehydrogenase;2,3-dihydro-2,3-dihydroxybenzoate dehydrogenase;Short-chain dehydrogenase/reductase SDR;Mercuric reductase	catalytic activity;binding;metabolism
AAEL001428	transcription factor Hairy, putative	RTT				GO:0003700,GO:0005634,GO:0006350,GO:0050789	ENSANGP00000027609 [Anopheles gambiae str. PEST]	Basic helix-loop-helix dimerisation region bHLH;Orange	transcription factor activity;nucleus;transcription;regulation of biological process
AAEL001429	amino acid transporter	TRP				GO:0005215,GO:0005623,GO:0006810	ENSANGP00000014776 [Anopheles gambiae str. PEST]	Amino acid transporter, transmembrane;Amino acid/polyamine transporter II	transporter activity;cell;transport												-0.55116	0.366102		0.528783	0.23257		0.674105
AAEL001430	hypothetical protein	U					secreted protein [Streptomyces avermitilis MA-4680]										-0.111973	-0.244721
AAEL001431	hypothetical protein	D					ENSANGP00000019827 [Anopheles gambiae str. PEST]	Prolinech region				0.635013	-0.375172	-0.242709		-0.302866	-0.0584674				-0.159564	-0.552537	-0.635013	-0.0623213	0.0995737		-0.0707466
AAEL001432	protein disulfide isomerase	D				GO:0003824,GO:0005489,GO:0005783,GO:0006118,GO:0006464,GO:0019538	ENSANGP00000027211 [Anopheles gambiae str. PEST]	Thioredoxinlated;Thioredoxin domain 2	catalytic activity;electron transporter activity;endoplasmic reticulum;electron transport;protein modification;protein metabolism			-0.309668	0.33466	0.280224	0.252786	0.323125			0.332363		0.320126	0.411276	0.309668	0.195112	0.130044	0.0430629	-0.00545296
AAEL001433	fgf receptor activating protein	D				GO:0007165,GO:0008283	ENSANGP00000019385 [Anopheles gambiae str. PEST]		signal transduction;cell proliferation											0.69487						0.438875	0.67801
AAEL001434	coronin	D				GO:0003779,GO:0005198	ENSANGP00000029333 [Anopheles gambiae str. PEST]	Regulator of chromosome condensation, RCC1;WD-40 repeat	actin binding;structural molecule activity
AAEL001435	Sp?tzle 2 (Spz2)	I	SPZ2	SPZ	SPZ		ENSANGP00000029467 [Anopheles gambiae str. PEST]			Aaeg:N23942
AAEL001436	hypothetical protein	U					ENSANGP00000027416 [Anopheles gambiae str. PEST]
AAEL001437	conserved hypothetical protein	D				GO:0005622,GO:0006350,GO:0006355,GO:0050789	ENSANGP00000019058 [Anopheles gambiae str. PEST]	Dwarfin protein	intracellular;transcription;regulation of transcription\, DNA-dependent;regulation of biological process
AAEL001438	hypothetical protein	D					ENSANGP00000014038 [Anopheles gambiae str. PEST]	Ankyrin
AAEL001439	mitochondrial ribosomal protein, L22, putative	REDOX/STRESS/MIT				GO:0005198,GO:0005739,GO:0005840,GO:0006412	mitochondrial ribosomal protein L22 CG4742-PA [Drosophila melanogaster]		structural molecule activity;mitochondrion;ribosome;protein biosynthesis
AAEL001440	E1a binding protein P400	D				GO:0000003,GO:0000166,GO:0000228,GO:0003676,GO:0003677,GO:0003824,GO:0005634,GO:0006139,GO:0006259,GO:0006350,GO:0006950,GO:0006996,GO:0007275,GO:0007582,GO:0008283,GO:0009719,GO:0016787,GO:0030528,GO:0043234,GO:0050789	ENSANGP00000017802 [Anopheles gambiae str. PEST]	Myb, DNA-binding;HSA;SNF2lated;Helicase, C-terminal;DEAD/DEAH box helicase	reproduction;nucleotide binding;nuclear chromosome;nucleic acid binding;DNA binding;catalytic activity;nucleus;nucleobase\, nucleoside\, nucleotide and nucleic acid metabolism;DNA metabolism;transcription;response to stress;organelle organization and biog			0.199491	0.227212	0.308635			0.208033	0.189667	-0.203664	-0.163482	0.0921829	0.196569	-0.199491	0.105679	-0.21246	-0.162334	-0.344788
AAEL001441	protein phosphatase 2c gamma	D				GO:0004721,GO:0006464,GO:0007165	ENSANGP00000028924 [Anopheles gambiae str. PEST]	Protein phosphatase 2C;Protein phosphatase 2C-like	phosphoprotein phosphatase activity;protein modification;signal transduction
AAEL001442	map-kinase activating death domain protein (madd)/denn/aex-3(c.elegans)	D				GO:0005102,GO:0006810,GO:0007267,GO:0016023,GO:0030234	ENSANGP00000001501 [Anopheles gambiae str. PEST]	uDENN;DENN;dDENN	receptor binding;transport;cell-cell signaling;cytoplasmic membrane-bound vesicle;enzyme regulator activity
AAEL001443	hypothetical protein	U
AAEL001444	conserved hypothetical protein	U					ENSANGP00000017052 [Anopheles gambiae str. PEST]
AAEL001445	conserved hypothetical protein	U					ENSANGP00000025544 [Anopheles gambiae str. PEST]
AAEL001446	testis-specific protein pbs13 (t-complex 11 )	D				GO:0000003,GO:0004872,GO:0007275	CG16721-PA [Drosophila melanogaster]	T-complex 11	reproduction;receptor activity;development				1.09943	0.792985		0.602846	0.274386	0.25762	0.921883		-0.0791945			-0.16248	-0.414939	0.0891453	0.0734179
AAEL001447	conserved hypothetical protein	D				GO:0005198,GO:0005623,GO:0005886,GO:0009653,GO:0016043	ENSANGP00000020730 [Anopheles gambiae str. PEST]	Claudin tight junction protein;Voltage-dependent calcium channel gamma	structural molecule activity;cell;plasma membrane;morphogenesis;cell organization and biogenesis
AAEL001448	conserved hypothetical protein	D				GO:0005509,GO:0008152,GO:0016740	ENSANGP00000019152 [Anopheles gambiae str. PEST]	Phospholipid/glycerol acyltransferase	calcium ion binding;metabolism;transferase activity			-0.139223	0.49438	0.141693	-0.479397	0.313746	0.297261		-0.166508	-0.221684	0.257428	0.118513	-0.351361	0.0852781		-0.301854	-0.475868
AAEL001449	conserved hypothetical protein	D				GO:0003676,GO:0005634,GO:0008270	CG13123-PA [Drosophila melanogaster]		nucleic acid binding;nucleus;zinc ion binding
AAEL001450	crossveinless	CS				GO:0005198,GO:0009653	ENSANGP00000017087 [Anopheles gambiae str. PEST]	von Willebrand factor, type C;von Willebrand factor, type D	structural molecule activity;morphogenesis
AAEL001451	DNA repair protein Rad62, putative	RTT					ENSANGP00000019276 [Anopheles gambiae str. PEST]																		0.139443
AAEL001452	conserved hypothetical protein	U					ENSANGP00000026476 [Anopheles gambiae str. PEST]
AAEL001453	conserved hypothetical protein	RTT					60S ribosomal protein L18a [Aedes albopictus]	Ribosomal L18ae protein
AAEL001454	hypothetical protein	U					ENSANGP00000020814 [Anopheles gambiae str. PEST]
AAEL001455	hypothetical protein	D				GO:0003676,GO:0005634,GO:0008270		Zinc finger, C2H2-type;Immunoglobulin/major histocompatibility complex;Zinc finger, C2H2-subtype	nucleic acid binding;nucleus;zinc ion binding
AAEL001456	conserved hypothetical protein	RTT				GO:0005634,GO:0008270	50S ribosomal protein [Tetrahymena thermophila SB210]		nucleus;zinc ion binding
AAEL001457	guanylatte cyclase alpha 1 subunit	D				GO:0003824,GO:0005737,GO:0005941,GO:0006139,GO:0007165,GO:0007582,GO:0009605,GO:0009628,GO:0019725	ENSANGP00000012438 [Anopheles gambiae str. PEST]	Adenylyl cyclase class-3/4/guanylyl cyclase;Heme NO binding associated	catalytic activity;cytoplasm;unlocalized protein complex;nucleobase\, nucleoside\, nucleotide and nucleic acid metabolism;signal transduction;physiological process;response to external stimulus;response to abiotic stimulus;cell homeostasis
AAEL001458	heparan sulfate sulfotransferase	D				GO:0005975,GO:0009607,GO:0016740	PREDICTED: similar to heparan sulfate (glucosamine) 3-O-sulfotransferase 5 [Apis mellifera]	Sulfotransferase	carbohydrate metabolism;response to biotic stimulus;transferase activity
AAEL001459	deltex, putative	D				GO:0003824,GO:0005102,GO:0005215,GO:0005488,GO:0005515,GO:0005622,GO:0005623,GO:0005737,GO:0006464,GO:0006810,GO:0007165,GO:0007275,GO:0043234,GO:0050789	GA17782-PA [Drosophila pseudoobscura]		catalytic activity;receptor binding;transporter activity;binding;protein binding;intracellular;cell;cytoplasm;protein modification;transport;signal transduction;development;protein complex;regulation of biological process
AAEL001460	hypothetical protein	U					GA21884-PA [Drosophila pseudoobscura]
AAEL001461	oxidoreductase	REDOX/STRESS/MIT				GO:0003824,GO:0008152	ENSANGP00000025535 [Anopheles gambiae str. PEST]	Short-chain dehydrogenase/reductase SDR;Glucose/ribitol dehydrogenase;2,3-dihydro-2,3-dihydroxybenzoate dehydrogenase;DNA-directed DNA polymerase X, beta-like;Flavin-containing amine oxidase;Insect alcohol dehydrogenase family;NAD-dependent epimerase/dehy	catalytic activity;metabolism
AAEL001462	protein phosphatase 2c gamma	D				GO:0004721,GO:0006464,GO:0007165	ENSANGP00000028924 [Anopheles gambiae str. PEST]	Protein phosphatase 2C;Protein phosphatase 2C-like	phosphoprotein phosphatase activity;protein modification;signal transduction						-0.0818972			-0.336066	-0.278885	0.799345	0.616122	0.547569		0.676281	0.451548	0.936388	0.121915
AAEL001463	conserved hypothetical protein	U					ENSANGP00000017151 [Anopheles gambiae str. PEST]
AAEL001464	conserved hypothetical protein	D				GO:0016021	ENSANGP00000002001 [Anopheles gambiae str. PEST]	YhhN-like	integral to membrane
AAEL001465	protein-l-isoaspartate o-methyltransferase	D				GO:0005737,GO:0006464,GO:0016740,GO:0019538			cytoplasm;protein modification;transferase activity;protein metabolism
AAEL001466	conserved hypothetical protein	U					CG33968-PA [Drosophila melanogaster]															0.543402
AAEL001467	sdk-P1	D				GO:0005886,GO:0009653,GO:0030154,GO:0050789	ENSANGP00000001527 [Anopheles gambiae str. PEST]	Fibronectin, type III subdomain;Vascular endothelial growth factor receptor, VEGFR;Immunoglobulin I-set;Immunoglobulin V-set;Immunoglobulin;Fibronectin, type III;Immunoglobulin-like	plasma membrane;morphogenesis;cell differentiation;regulation of biological process
AAEL001468	hypothetical protein	U					ENSANGP00000020814 [Anopheles gambiae str. PEST]
AAEL001469	kek1	I(LRR)				GO:0003824,GO:0008152,GO:0009607,GO:0016209	ENSANGP00000007453 [Anopheles gambiae str. PEST]	Leucinech repeat;Interleukin-1 receptor, type I and type II;Immunoglobulin I-set;Immunoglobulin;Leucinech repeat, typical subtype;Immunoglobulin-like	catalytic activity;metabolism;response to biotic stimulus;antioxidant activity
AAEL001470	poly(adpbose) glycohydrolase	RTT				GO:0005975,GO:0006091,GO:0009056,GO:0016787	Poly(ADPbose) glycohydrolase CG2864-PA [Drosophila melanogaster]		carbohydrate metabolism;generation of precursor metabolites and energy;catabolism;hydrolase activity												0.768413	0.411425		0.359484	0.52567		0.888656
AAEL001471	hypothetical protein	D				GO:0008270	ENSANGP00000013315 [Anopheles gambiae str. PEST]	Zinc finger, ZZ-type;Antifreeze protein, type I;Octicosapeptide/Phox/Bem1p;Ubiquitin-associated	zinc ion binding			-0.250415	-0.520999	-0.676102	-0.73688	-0.581539	-0.496458	-0.485077	-0.618491			-0.471817		-0.316801	-0.28204		-0.373977
AAEL001472	phosphatidyltransferase	M				GO:0006629,GO:0009058,GO:0016740	ENSANGP00000013899 [Anopheles gambiae str. PEST]	CDP-alcohol phosphatidyltransferase	lipid metabolism;biosynthesis;transferase activity
AAEL001473	dynamin-associated protein	D				GO:0005509,GO:0005515,GO:0005623,GO:0006810,GO:0007267,GO:0007275,GO:0007582,GO:0015031,GO:0016043,GO:0040007	ENSANGP00000005190 [Anopheles gambiae str. PEST]	Calcium-binding EF-hand;Src homology-3;Neutrophil cytosol factor 2;Variant SH3;EPS15 homology (EH)	calcium ion binding;protein binding;cell;transport;cell-cell signaling;development;physiological process;protein transport;cell organization and biogenesis;growth
AAEL001474	conserved hypothetical protein	D					ENSANGP00000026491 [Anopheles gambiae str. PEST]	Norrie disease protein
AAEL001475	conserved hypothetical protein	D				GO:0005158	ENSANGP00000013150 [Anopheles gambiae str. PEST]	Insulin receptor substrate-1, PTB
AAEL001476	conserved hypothetical protein	D				GO:0003676,GO:0005102,GO:0005515,GO:0005623,GO:0005634,GO:0005737,GO:0007165,GO:0007275,GO:0007582,GO:0007610,GO:0009653,GO:0030154,GO:0050789	ENSANGP00000006150 [Anopheles gambiae str. PEST]	Phosphotyrosine interaction region;NUMB phenylalaninech	nucleic acid binding;receptor binding;protein binding;cell;nucleus;cytoplasm;signal transduction;development;physiological process;behavior;morphogenesis;cell differentiation;regulation of biological process												-0.817485	-0.871674	-0.461064	-0.619968	-0.910982	-0.299505	-1.06084
AAEL001477	laminin alpha-1, 2 chain	CS				GO:0003723,GO:0005102,GO:0005198,GO:0005578,GO:0005623,GO:0007049,GO:0007165,GO:0007275,GO:0007582,GO:0008233,GO:0009653,GO:0009790,GO:0016043,GO:0019538,GO:0030154,GO:0043234,GO:0050789	wing blister CG15288-PB, isoform B [Drosophila melanogaster]	EGF-like region;EGF-like, laminin;Laminin II;Laminin G, subdomain 2;Laminin G, subdomain 1;Laminin B;Laminin I;Laminin G	RNA binding;receptor binding;structural molecule activity;extracellular matrix (sensu Metazoa);cell;cell cycle;signal transduction;development;physiological process;peptidase activity;morphogenesis;embryonic development;cell organization and biogenesis;pr
AAEL001478	bile acid beta-glucosidase, putative	D					ENSANGP00000006376 [Anopheles gambiae str. PEST]	Protein of unknown function DUF608
AAEL001479	protoheme ix farnesyltransferase	D				GO:0005623,GO:0005739,GO:0008152,GO:0009058,GO:0016740,GO:0019748	ENSANGP00000013941 [Anopheles gambiae str. PEST]	UbiA prenyltransferase	cell;mitochondrion;metabolism;biosynthesis;transferase activity;secondary metabolism			1.60022	1.75336	1.51677	1.47069	1.47559	1.50812	1.51024	1.62669	1.66263	1.80234	1.14823	1.74434	1.61523	1.51233	1.38783	1.50154
AAEL001480	phosphoglucomutase	M				GO:0003824,GO:0005975	phosphoglucomutase 2 [Aedes aegypti]	Phosphoglucomutase/phosphomannomutase;Phosphoglucomutase/phosphomannomutase alpha/beta/alpha domain I;Phosphoglucomutase/phosphomannomutase alpha/beta/alpha domain II	catalytic activity;carbohydrate metabolism																-0.420215
AAEL001481	hypothetical protein	U					ENSANGP00000029177 [Anopheles gambiae str. PEST]
AAEL001482	hypothetical protein	U					CG18397-PA [Drosophila melanogaster]													0.276685	0.147248			0.528813	0.231673	0.464596	-0.121361
AAEL001483	conserved hypothetical protein	U					ENSANGP00000018357 [Anopheles gambiae str. PEST]	Lipid-binding START
AAEL001484	chromosome region maintenance protein 1/exportin	D				GO:0004872,GO:0005215,GO:0005515,GO:0005635,GO:0005737,GO:0007275,GO:0015031,GO:0016043,GO:0043234			receptor activity			0.648269	-0.187616	0.593323	-0.162741	0.239915	0.265367	0.921207		0.391405	-0.215606		-0.552503	0.111096	-0.142759	0.597669	-0.339643
AAEL001485	conserved hypothetical protein	D					ENSANGP00000013007 [Anopheles gambiae str. PEST]	Calcium-binding EF-hand;Destabilase
AAEL001486	hypothetical protein	D					Male-specific RNA 84Dd CG17935-PA [Drosophila melanogaster]
AAEL001487	conserved hypothetical protein	CSR					odorant-binding protein OBPjj83c [Anopheles gambiae]	Pheromone/general odorant binding protein, PBP/GOBP
AAEL001488	ribosomal protein L15	RTT				GO:0003735,GO:0005622,GO:0005840,GO:0006412	ENSANGP00000026442 [Anopheles gambiae str. PEST]	Ribosomal protein L15e	structural constituent of ribosome;intracellular;ribosome;protein biosynthesis			-0.090494	-0.179071	-0.513911		-0.21624	-0.283924	-0.378295	-0.509297	-0.270702	-0.133179	-0.512585	-0.0237315		-0.326382		-0.658915
AAEL001489	hypothetical protein	U					ENSANGP00000018228 [Anopheles gambiae str. PEST]
AAEL001490	acylphosphatase, putative	D				GO:0003998	ENSANGP00000018310 [Anopheles gambiae str. PEST]	Acylphosphatase	acylphosphatase activity												-0.146116	0.859093		0.250954	0.19009	-0.276161	0.197621
AAEL001491	conserved hypothetical protein	D					ENSANGP00000012631 [Anopheles gambiae str. PEST]	Ras GTPase
AAEL001492	cgmp-dependent 3,5-cyclic phosphodiesterase	D				GO:0006139,GO:0007165,GO:0016787	ENSANGP00000006713 [Anopheles gambiae str. PEST]	3'5'-cyclic nucleotide phosphodiesterase;Arginase/agmatinase/formiminoglutamase;GAF	nucleobase\, nucleoside\, nucleotide and nucleic acid metabolism;signal transduction;hydrolase activity
AAEL001493	conserved hypothetical protein	D					ENSANGP00000026976 [Anopheles gambiae str. PEST]	EGF-like region;Rieske iron-sulfur protein;EGF-like, laminin;Laminin, N-terminal;Laminin B
AAEL001494	conserved hypothetical protein	D				GO:0007155	ENSANGP00000012360 [Anopheles gambiae str. PEST]	Beta-Ig-H3/fasciclin	cell adhesion
AAEL001495	conserved hypothetical protein	U																		-0.245151	0.29694		0.417115	0.204045	0.120687	0.835319
AAEL001496	transcription elongation factor s-ii	RTT				GO:0003677,GO:0003700,GO:0005634,GO:0006350,GO:0030528,GO:0050789	ENSANGP00000005186 [Anopheles gambiae str. PEST]	Transcription factor TFIIS;Transcription elongation factor S-II, central region	DNA binding;transcription factor activity;nucleus;transcription;transcription regulator activity;regulation of biological process					-0.168188						0.113984						0.1631	-0.213322
AAEL001497	vacuolar protein sorting	D				GO:0000003,GO:0003676,GO:0005215,GO:0005488,GO:0005634,GO:0005739,GO:0005794,GO:0006810,GO:0016043,GO:0019538,GO:0030154	ENSANGP00000019579 [Anopheles gambiae str. PEST]	Vps54-like	reproduction;nucleic acid binding;transporter activity;binding;nucleus;mitochondrion;Golgi apparatus;transport;cell organization and biogenesis;protein metabolism;cell differentiation
AAEL001498	hypothetical protein	U					GA12032-PA [Drosophila pseudoobscura]
AAEL001499	conserved hypothetical protein	U					ENSANGP00000018228 [Anopheles gambiae str. PEST]
AAEL001500	insulinprotein enhancer protein isl	D				GO:0003677,GO:0003700,GO:0005488,GO:0005634,GO:0006350,GO:0007165,GO:0007275,GO:0009653,GO:0009790,GO:0016043,GO:0030154,GO:0030528,GO:0050789	ENSANGP00000006189 [Anopheles gambiae str. PEST]	Homeobox;LIM, zinc-binding;Helix-turn-helix motif, lambda-like repressor;LIM homeobox	DNA binding;transcription factor activity;binding;nucleus;transcription;signal transduction;development;morphogenesis;embryonic development;cell organization and biogenesis;cell differentiation;transcription regulator activity;regulation of biological pro
AAEL001501	anamorsin, putative	D					ENSANGP00000013898 [Anopheles gambiae str. PEST]	Protein of unknown function DUF689						-0.690995	-0.31033			-0.788453	0.16398								-0.366928
AAEL001502	hypothetical protein	U					hypothetical protein AN1476.2 [Aspergillus nidulans FGSC A4]
AAEL001503	sodium/hydrogen exchanger 3 (nhe3)	TRP				GO:0005215,GO:0005623,GO:0006811,GO:0007582		Sodium/hydrogen exchanger subfamily;Na+/H+ exchanger, isoform 3 (NHE3);Sodium/hydrogen exchanger	transporter activity;cell;ion transport;physiological process
AAEL001504	Dual specificity tyrosine-phosphorylationgulated kinase	D				GO:0000166,GO:0004672,GO:0004871,GO:0005829,GO:0006464,GO:0007275,GO:0007610,GO:0008219,GO:0008283,GO:0009628,GO:0016740,GO:0050789	ENSANGP00000018464 [Anopheles gambiae str. PEST]	Protein kinase;Serine/threonine protein kinase, active site	nucleotide binding;protein kinase activity;signal transducer activity;cytosol;protein modification;development;behavior;cell death;cell proliferation;response to abiotic stimulus;transferase activity;regulation of biological process
AAEL001505	conserved hypothetical protein	D					ENSANGP00000018258 [Anopheles gambiae str. PEST]	RabGAP/TBC
AAEL001506	U3 small nucleolar ribonucleoprotein protein mpp10	RTT				GO:0003676,GO:0003723,GO:0006139	ENSANGP00000013883 [Anopheles gambiae str. PEST]	Mpp10 protein	nucleic acid binding;RNA binding;nucleobase\, nucleoside\, nucleotide and nucleic acid metabolism
AAEL001507	conserved hypothetical protein	U					ENSANGP00000004373 [Anopheles gambiae str. PEST]
AAEL001508	conserved hypothetical protein	U					ENSANGP00000021279 [Anopheles gambiae str. PEST]
AAEL001509	conserved hypothetical protein	U											-0.455533	0.387348	-0.434325		-0.516149		0.575417	-0.300773	-0.0973497	-0.121712	0.267877	0.246298	-0.429049	-0.198506
AAEL001510	Odorant receptor 94b, putative	CSR				GO:0004984,GO:0005549,GO:0007608,GO:0016020	ENSANGP00000025126 [Anopheles gambiae str. PEST]	Olfactory receptor, Drosophila	olfactory receptor activity;odorant binding;sensory perception of smell;membrane
AAEL001511	conserved hypothetical protein	U					ENSANGP00000019800 [Anopheles gambiae str. PEST]													0.683434	-0.0801678	-0.365878	-0.285768		0.31908	0.405913	-0.484561
AAEL001512	hypothetical protein	D					Ariadne homolog 2 [Danio rerio]
AAEL001513	wdpeat protein	D				GO:0009653,GO:0016043	ENSANGP00000004397 [Anopheles gambiae str. PEST]	WD-40 repeat;Tetratricopeptide region	morphogenesis;cell organization and biogenesis
AAEL001514	conserved hypothetical protein	CS				GO:0005576,GO:0006030,GO:0008061	LP07759p [Drosophila melanogaster]	Chitin binding Peritrophin-A	extracellular region;chitin metabolism;chitin binding
AAEL001515	Bcl-2 associated protein, putative	I				GO:0005739,GO:0006810,GO:0006950,GO:0007005,GO:0008219,GO:0009719,GO:0042981,GO:0050789	Bcl-2 family protein Anob-1 [Anopheles gambiae]	Apoptosis regulator Bcl-2, BH;BCL2-like apoptosis inhibitor	mitochondrion;transport;response to stress;mitochondrion organization and biogenesis;cell death;response to endogenous stimulus;regulation of apoptosis;regulation of biological process											-0.244239	0.0242927	0.223257	0.305051	0.130028	0.0212927	-0.0535194	0.0731777
AAEL001516	vesicle associated protein, putative	D				GO:0005783,GO:0005794,GO:0006810,GO:0015031,GO:0016023,GO:0016043			endoplasmic reticulum			0.415155		0.343044	-0.114809				0.358103	0.476443	-0.0500397	0.400259		0.694407	0.45142	0.245239	0.182259
AAEL001517	carboxylesterase	REDOX/STRESS/MIT					carboxylesterase [Athalia rosae]	Carboxylesterase, type B;Esterase/lipase/thioesterase												-0.535338	-0.383147			-0.159532	0.233076	-0.336015	0.180314
AAEL001518	zinc finger protein	D				GO:0008270	ENSANGP00000019790 [Anopheles gambiae str. PEST]	Zinc finger, C2H2-type	zinc ion binding
AAEL001519	hypothetical protein	U					ENSANGP00000019795 [Anopheles gambiae str. PEST]	DH
AAEL001520	conserved hypothetical protein	U					ENSANGP00000019803 [Anopheles gambiae str. PEST]
AAEL001521	death executioner Bcl-2, putative	D				GO:0005739,GO:0006810,GO:0006950,GO:0007005,GO:0008219,GO:0009719,GO:0042981,GO:0050789	ENSANGP00000015933 [Anopheles gambiae str. PEST]	Apoptosis regulator Bcl-2, BH;BCL2-like apoptosis inhibitor	mitochondrion;transport;response to stress;mitochondrion organization and biogenesis;cell death;response to endogenous stimulus;regulation of apoptosis;regulation of biological process				0.283116	0.296339	0.11905				0.497695			0.274523		-0.187504	-0.299408		-0.25888
AAEL001522	conserved hypothetical protein	U					ENSANGP00000015999 [Anopheles gambiae str. PEST]	YLP motif;Prolinech region
AAEL001523	secretory Phospholipase A2, putative	M				GO:0004623,GO:0005509,GO:0005576,GO:0006644	ENSANGP00000019797 [Anopheles gambiae str. PEST]	Phospholipase A2, active site;A2 Phospholipase	phospholipase A2 activity;calcium ion binding;extracellular region;				0.84857	0.398917	0.897706		0.460373		-0.726692
AAEL001524	rab23	D				GO:0000166,GO:0006810,GO:0007165,GO:0015031,GO:0016043,GO:0016787	ENSANGP00000019806 [Anopheles gambiae str. PEST]	Ras GTPase;L-lactate/malate dehydrogenase;GTP-binding nuclear protein Ran;TrkA potassium uptake protein	nucleotide binding;transport;signal transduction;protein transport;cell organization and biogenesis;hydrolase activity
AAEL001525	conserved hypothetical protein	D				GO:0005622,GO:0006461,GO:0006886,GO:0030130	ENSANGP00000004381 [Anopheles gambiae str. PEST]	VHS;GAT;Alpha/gamma adaptin, C-terminal;Gamma-adaptin, C-terminal	intracellular;protein complex assembly;intracellular protein transport;																0.571217	0.281843
AAEL001526	zinc finger protein	D				GO:0003700,GO:0005488,GO:0005634,GO:0006350,GO:0008283,GO:0009653,GO:0050789	GA21024-PA [Drosophila pseudoobscura]	Zinc finger, C2H2-type;Zinc finger, C2H2-subtype	transcription factor activity;binding;nucleus;transcription;cell proliferation;morphogenesis;regulation of biological process
AAEL001527	conserved hypothetical protein	D				GO:0003676,GO:0003677,GO:0003723,GO:0005634,GO:0007275,GO:0009790,GO:0030154	ENSANGP00000019799 [Anopheles gambiae str. PEST]		nucleic acid binding;DNA binding;RNA binding;nucleus;development;embryonic development;cell differentiation
AAEL001528	hypothetical protein	D				GO:0004623,GO:0005509,GO:0005576,GO:0006644	ENSANGP00000019797 [Anopheles gambiae str. PEST]	Phospholipase A2, active site;A2 Phospholipase	phospholipase A2 activity;calcium ion binding;extracellular region;			0.395708	0.615407	0.653064	1.0582		0.85482	0.470491	-0.484192
AAEL001529	hypothetical protein	U					ENSANGP00000015071 [Anopheles gambiae str. PEST]
AAEL001530	hypothetical protein	U					ENSANGP00000019802 [Anopheles gambiae str. PEST]	DH				0.26771	-0.125076	-0.122557			-0.190978	0.144092		-0.126398
AAEL001531	conserved hypothetical protein	D					ENSANGP00000029075 [Anopheles gambiae str. PEST]	Zinc finger, CCCH-type
AAEL001532	fad nad binding oxidoreductases	D					ENSANGP00000019801 [Anopheles gambiae str. PEST]	Yippee-like protein
AAEL001533	glucosyl/glucuronosyl transferases	M				GO:0005975,GO:0006629,GO:0009607,GO:0009628,GO:0016740	ENSANGP00000004395 [Anopheles gambiae str. PEST]	UDP-glucuronosyl/UDP-glucosyltransferase	carbohydrate metabolism;lipid metabolism;response to biotic stimulus;response to abiotic stimulus;transferase activity
AAEL001534	hypothetical protein	D				GO:0005515,GO:0006355,GO:0008270			protein binding;regulation of transcription\, DNA-dependent;zinc ion binding
AAEL001535	conserved hypothetical protein	D					ENSANGP00000019793 [Anopheles gambiae str. PEST]	Immunoglobulin-like
AAEL001536	homeobox protein abdominal-A, putative	RTT					PREDICTED: similar to Muscleblind isoform C [Apis mellifera]
AAEL001537	bax inhibitor	I					ENSANGP00000018745 [Anopheles gambiae str. PEST]	Protein of unknown function UPF0005
AAEL001538	conserved hypothetical protein	U											0.267492
AAEL001539	hypothetical protein	U					ENSANGP00000013808 [Anopheles gambiae str. PEST]					0.321695											-0.321695
AAEL001540	ubiquitin specific protease	PROT				GO:0006464,GO:0008233,GO:0009056,GO:0019538	ENSANGP00000009352 [Anopheles gambiae str. PEST]	Peptidase C19, ubiquitin carboxyl-terminal hydrolase 2	protein modification;peptidase activity;catabolism;protein metabolism												-0.360488					0.342514	-0.120683
AAEL001541	component of oligomeric golgi complex	D					ENSANGP00000011010 [Anopheles gambiae str. PEST]	Conserved oligomeric complex COG6				-0.453624	-0.53337		0.253462		0.30823	0.30308	0.435852			-0.309748	0.453624	-0.293391		0.456	-0.232546
AAEL001542	voltage and ligand gated potassium channel	TRP				GO:0005216,GO:0005886,GO:0006811,GO:0043234	ENSANGP00000009272 [Anopheles gambiae str. PEST]	EAG/ELK/ERG potassium channel;Erg channel;ELK potassium channel;EAG potassium channel;Ion transport;Ion transport 2, bacterial;Cyclic nucleotide-binding;K+ channel, pore region;Cation channel, non-ligand gated	ion channel activity;plasma membrane;ion transport;protein complex
AAEL001543	hypothetical protein	RTT					Helicase conserved C-terminal domain containing protein [Tetrahymena thermophila SB210]						0.272332	-0.233301	-0.162298				0.657759						-0.276197
AAEL001544	conserved hypothetical protein	U										0.397189	0.678966	-0.0765987	-0.226419	0.322555	0.512919	-0.246325	-0.119558	0.393914	0.685329		-0.397189	0.495989	0.472213	0.0711807
AAEL001545	conserved hypothetical protein	D				GO:0003676,GO:0005634,GO:0008270	Zfp553 protein [Mus musculus]	Zinc finger, C2H2-type;Peptidase M, neutral zinc metallopeptidases, zinc-binding site;Zinc finger, C2H2-subtype	nucleic acid binding;nucleus;zinc ion binding
AAEL001546	protein phosphatase 1 regulatory inhibitor subunit 16a	D				GO:0004721,GO:0005198,GO:0009653,GO:0016787,GO:0030234	ENSANGP00000015633 [Anopheles gambiae str. PEST]	Ankyrin	phosphoprotein phosphatase activity;structural molecule activity;morphogenesis;hydrolase activity;enzyme regulator activity
AAEL001547	hypothetical protein	RTT					ribosomal protein S27a [Aedes albopictus]	Zinc finger, C2H2-type;Ubiquitin;Ribosomal protein S27a
AAEL001548	glucosyl/glucuronosyl transferases	M				GO:0005975,GO:0006629,GO:0009607,GO:0009628,GO:0016740	ENSANGP00000010828 [Anopheles gambiae str. PEST]	UDP-glucuronosyl/UDP-glucosyltransferase	carbohydrate metabolism;lipid metabolism;response to biotic stimulus;response to abiotic stimulus;transferase activity			-0.768333	0.447891	0.482049	0.455809	0.17535	0.165145		0.258054	-0.639614			0.353718			-0.16634	0.556783
AAEL001549	protein kinase c	D				GO:0000166,GO:0004672,GO:0004871,GO:0004872,GO:0005622,GO:0006464,GO:0007049,GO:0007165,GO:0007267,GO:0007582,GO:0009653,GO:0009790	ENSANGP00000010728 [Anopheles gambiae str. PEST]	Protein kinase;PKN/rhophilin/rhotekin rho-binding repeat;Protein kinase, C-terminal	nucleotide binding;protein kinase activity;signal transducer activity;receptor activity;intracellular;protein modification;cell cycle;signal transduction;cell-cell signaling;physiological process;morphogenesis;embryonic development			-0.232467	-0.482761	-0.697343	-0.541264	-0.722119	-0.48889	-0.408366	-0.487539				0.232467
AAEL001550	hypothetical protein	U					unnamed protein product [Mus musculus]
AAEL001551	conserved hypothetical protein	D				GO:0003676,GO:0005634,GO:0008270	PREDICTED: similar to vav-1 interacting Kruppel-like protein isoform a [Pan troglodytes]		nucleic acid binding
AAEL001552	conserved hypothetical protein	U					ENSANGP00000010794 [Anopheles gambiae str. PEST]
AAEL001553	conserved hypothetical protein	CS				GO:0005576,GO:0006030,GO:0008061	ENSANGP00000010837 [Anopheles gambiae str. PEST]	Chitin binding Peritrophin-A	extracellular region;chitin metabolism;chitin binding
AAEL001554	phd finger protein	D				GO:0003676,GO:0003677,GO:0005488,GO:0005634,GO:0006139,GO:0006350,GO:0030528,GO:0050789	ENSANGP00000010809 [Anopheles gambiae str. PEST]	Zinc finger, PHD-type;Bromodomain	nucleic acid binding;DNA binding;binding;nucleus;nucleobase\, nucleoside\, nucleotide and nucleic acid metabolism;transcription;transcription regulator activity;regulation of biological process				-0.40725	-0.0602558	-0.182649			-0.165901	0.150581	0.204066
AAEL001555	conserved hypothetical protein	U					RE44946p [Drosophila melanogaster]
AAEL001556	conserved hypothetical protein	U					ENSANGP00000011057 [Anopheles gambiae str. PEST]
AAEL001557	mucolipin	D				GO:0005216,GO:0005623,GO:0006629,GO:0006810,GO:0006811	CG8743-PA [Drosophila melanogaster]		ion channel activity;cell;lipid metabolism;transport;ion transport			0.221876	0.353929	0.151726	0.37761	0.34038	0.51413	0.186531	0.589145	-0.28222					0.0894668	-0.236739
AAEL001558	hypothetical protein	U					ENSANGP00000019755 [Anopheles gambiae str. PEST]
AAEL001559	conserved hypothetical protein	D				GO:0004672,GO:0005524,GO:0006468	ENSANGP00000010853 [Anopheles gambiae str. PEST]	Protein kinase;Serine/threonine protein kinase, active site	protein kinase activity;ATP binding;protein amino acid phosphorylation											0.351787	0.505134	0.410433	0.382775	0.396872	0.511303	0.619844	0.371918
AAEL001560	conserved hypothetical protein	U					unnamed protein product [Tetraodon nigroviridis]	EAG/ELK/ERG potassium channel;Erg channel;ELK potassium channel;EAG potassium channel;Ion transport;Ion transport 2, bacterial;Cyclic nucleotide-binding;K+ channel, pore region;Cation channel, non-ligand gated
AAEL001561	conserved hypothetical protein	U
AAEL001562	hypothetical protein	U					ENSANGP00000028870 [Anopheles gambiae str. PEST]						-0.176513		0.0806473	-0.135067			-0.275519		-0.139939	-0.16279				-0.141615	-0.363418
AAEL001563	conserved hypothetical protein	U					ENSANGP00000009356 [Anopheles gambiae str. PEST]										0.283669		0.266253
AAEL001564	taz protein (tafazzin)	M				GO:0008152,GO:0016740	ENSANGP00000010939 [Anopheles gambiae str. PEST]	Tafazzin;Phospholipid/glycerol acyltransferase	metabolism;transferase activity
AAEL001565	peptidyl-glycine alpha-amidating monooxygenase	M				GO:0003824,GO:0005488,GO:0005623,GO:0006464,GO:0008152	GA11425-PA [Drosophila pseudoobscura]	Peptidyl-glycine alpha-amidating monooxygenase;NHL repeat	catalytic activity;binding;cell;protein modification;metabolism			-0.527026	-0.54413	-0.420447	-0.718975	-0.270568	-0.483191	-0.256138	-0.350794		-0.221089	-0.12947	0.527026	-0.259955	-0.541336		-0.12204
AAEL001566	bone morphogenetic protein	D				GO:0005488,GO:0005509,GO:0007275,GO:0008233,GO:0019538	ENSANGP00000021251 [Anopheles gambiae str. PEST]	Aspartic acid and asparagine hydroxylation site;Peptidase M, neutral zinc metallopeptidases, zinc-binding site;EGF-like region;EGF-like calcium-binding;Peptidase M12A, astacin;CUB;EGF calcium-binding;EGF-like;EGF-like, type 3	binding;calcium ion binding;development;peptidase activity;protein metabolism												-0.364294	-0.367956			-0.426884	-0.145593
AAEL001567	myocyte-specific enhancer factor 2d	RTT				GO:0000003,GO:0003700,GO:0005509,GO:0005634,GO:0006350,GO:0007275,GO:0008283,GO:0009653,GO:0030528,GO:0050789	Myocyte enhancing factor 2 CG1429-PB, isoform B [Drosophila melanogaster]	Transcription factor, MADS-box	reproduction;transcription factor activity;calcium ion binding;nucleus;transcription;development;cell proliferation;morphogenesis;transcription regulator activity;regulation of biological process
[truncated: 15,783 more rows]
